# Supplementary material for: Identification of Differentially Expressed Genes Particularly Associated with Immunity in Uremia Patients by Bioinformatic Analysis
Source: Hindawi journal article supplement (doi:10.1155/2022/5437560), 2022-12-29
Supplement: f1 [file 5437560.f1.pdf]

## Differentially expressed genes

| Gene ID       | Log <sub>2</sub> (Fold Change) | Average Expression | P.Value  | adjust P.Value | Benjamini  |
|---------------|--------------------------------|--------------------|----------|----------------|------------|
| PIGL          | -1.491955546                   | 3.892655688        | 1.83E-66 | 3.95E-62       | 141.222208 |
| DCLRE1A       | -1.966083899                   | 4.545018107        | 9.12E-66 | 9.88E-62       | 139.640398 |
| ZFP30         | -2.395371558                   | 3.321088347        | 7.18E-64 | 5.19E-60       | 135.340517 |
| TRADD         | -1.296522309                   | 7.193819784        | 1.13E-63 | 6.13E-60       | 134.891461 |
| CALU          | -1.141605685                   | 4.961123052        | 2.25E-63 | 9.76E-60       | 134.212644 |
| TAF1          | -1.432216339                   | 4.904520278        | 2.91E-63 | 1.05E-59       | 133.962308 |
| YRDC          | -1.673056925                   | 5.384928036        | 1.01E-62 | 3.14E-59       | 132.728485 |
| ZNF213-AS1    | -1.787303352                   | 3.282177997        | 1.33E-62 | 3.59E-59       | 132.463579 |
| SLC39A13      | -1.665456812                   | 5.310808605        | 6.95E-62 | 1.67E-58       | 130.828594 |
| UQCC1         | -1.311684792                   | 4.774210987        | 1.23E-61 | 2.67E-58       | 130.262207 |
| RP11-61L19.3  | -2.023988072                   | 3.449154531        | 4.01E-58 | 7.24E-55       | 122.257809 |
| PARG          | -2.382012188                   | 4.438969804        | 6.30E-58 | 1.05E-54       | 121.810208 |
| ENTPD7        | -1.320760213                   | 4.414523487        | 8.18E-58 | 1.27E-54       | 121.551188 |
| PIGW          | -2.278412246                   | 3.192312168        | 2.66E-57 | 3.84E-54       | 120.381875 |
| ZNF419        | -1.548640323                   | 5.546434358        | 9.98E-57 | 1.35E-53       | 119.069972 |
| ZNF626        | -1.300204755                   | 3.727575735        | 6.90E-56 | 8.79E-53       | 117.150883 |
| OTUD3         | -2.167153797                   | 3.868900616        | 1.08E-55 | 1.30E-52       | 116.706165 |
| FAM219B       | -1.033461442                   | 5.392349589        | 4.00E-55 | 4.33E-52       | 115.404434 |
| NRF1          | -1.10871798                    | 4.913572685        | 5.97E-55 | 6.16E-52       | 115.006666 |
| RP11-140I16.3 | -1.926054848                   | 3.542831623        | 9.29E-55 | 9.14E-52       | 114.568057 |
| BHMT          | -1.78511677                    | 4.122986819        | 1.16E-54 | 1.10E-51       | 114.343583 |
| ACTR3B        | -1.412197505                   | 4.766670919        | 2.43E-54 | 2.19E-51       | 113.612444 |
| GTF3C4        | -1.210480012                   | 4.532651495        | 4.81E-54 | 4.17E-51       | 112.932649 |
| EXTL3-AS1     | -1.449904193                   | 2.792068865        | 5.76E-54 | 4.62E-51       | 112.753975 |
| KIF3A         | -2.041730081                   | 3.761908054        | 5.87E-54 | 4.62E-51       | 112.734781 |
| BC047484      | -2.24910512                    | 3.581283495        | 5.97E-54 | 4.62E-51       | 112.718726 |
| ZNF789        | -1.126723982                   | 3.871701841        | 6.77E-54 | 5.06E-51       | 112.593257 |
| AIG1          | -1.305247316                   | 3.499670151        | 7.89E-54 | 5.70E-51       | 112.440588 |
| RP11-29H23.4  | -2.158769987                   | 3.578391595        | 1.61E-53 | 1.12E-50       | 111.730202 |
| KIAA0391      | -1.516866381                   | 3.579127035        | 1.66E-53 | 1.12E-50       | 111.701924 |
| PIGN          | -1.467052472                   | 4.000823018        | 2.83E-53 | 1.86E-50       | 111.168912 |
| RP11-5C23.2   | -1.899904852                   | 4.111746175        | 4.48E-53 | 2.85E-50       | 110.713617 |
| NBPF20        | -1.648725333                   | 3.755663589        | 5.71E-53 | 3.53E-50       | 110.471981 |
| LINC00667     | -1.294406189                   | 4.305317251        | 7.31E-53 | 4.40E-50       | 110.226078 |
| CDK2          | -1.193928632                   | 3.909854354        | 8.03E-53 | 4.70E-50       | 110.133407 |
| SNORA72       | -1.373636799                   | 2.666057178        | 9.00E-53 | 5.13E-50       | 110.019614 |
| BMF           | -1.671995565                   | 4.938634808        | 9.91E-53 | 5.50E-50       | 109.923604 |
| ABCB1         | -1.564389189                   | 3.619348808        | 1.24E-52 | 6.70E-50       | 109.702273 |
| PCGF6         | -1.764627375                   | 3.706667565        | 1.84E-52 | 9.71E-50       | 109.309008 |
| ANKLE2        | -1.364628649                   | 4.450573436        | 1.92E-52 | 9.88E-50       | 109.267568 |
| SMURF1        | -1.033516379                   | 4.282476009        | 3.23E-52 | 1.63E-49       | 108.747992 |
| LIX1L         | -1.976889257                   | 5.60847267         | 4.85E-52 | 2.33E-49       | 108.343507 |
| SLC25A15      | -1.579863867                   | 4.405526674        | 5.44E-52 | 2.56E-49       | 108.229084 |
| UTP15         | -1.09229198                    | 3.06589816         | 5.69E-52 | 2.62E-49       | 108.184188 |
| ZNF75D        | -1.469568046                   | 3.67774556         | 7.85E-52 | 3.54E-49       | 107.863444 |
| UEVLD         | -1.500748097                   | 4.92085537         | 9.40E-52 | 4.15E-49       | 107.684671 |
| LOC100129198  | -1.689641406                   | 3.535256428        | 9.89E-52 | 4.24E-49       | 107.63355  |
| SCML2         | -1.849324505                   | 4.413730109        | 1.80E-51 | 7.37E-49       | 107.034572 |
| CWF19L1       | -1.232606433                   | 5.64526445         | 2.93E-51 | 1.18E-48       | 106.551466 |
| E2F5          | -2.170400453                   | 3.341950065        | 3.14E-51 | 1.24E-48       | 106.481562 |
| SNHG22        | -1.602603192                   | 3.804606354        | 3.28E-51 | 1.27E-48       | 106.441035 |
| GCFC2         | -1.472474117                   | 3.162769039        | 3.58E-51 | 1.36E-48       | 106.352831 |
| SH3BP2        | -1.168588751                   | 5.456261184        | 3.74E-51 | 1.40E-48       | 106.307688 |
| FAM188A       | -1.517482019                   | 3.076504265        | 4.67E-51 | 1.71E-48       | 106.087869 |
| HMGCS1        | -1.174174729                   | 3.396134393        | 6.20E-51 | 2.24E-48       | 105.805125 |
| NUP205        | -1.768381981                   | 4.561485245        | 6.42E-51 | 2.27E-48       | 105.770708 |

|               |              |             |          |          |            |
|---------------|--------------|-------------|----------|----------|------------|
| CXorf24       | -2.290713472 | 3.887161302 | 6.50E-51 | 2.27E-48 | 105.758569 |
| NDUFAF7       | -1.36337104  | 3.640821853 | 7.58E-51 | 2.61E-48 | 105.604703 |
| LOC100996251  | -1.304857301 | 3.029624862 | 7.92E-51 | 2.68E-48 | 105.561266 |
| ERCC4         | -1.389360232 | 4.121700901 | 9.78E-51 | 3.26E-48 | 105.351305 |
| FRMD8         | -1.347549674 | 5.613445107 | 1.14E-50 | 3.73E-48 | 105.200687 |
| ZNF43         | -2.114387205 | 3.960416503 | 1.18E-50 | 3.82E-48 | 105.163663 |
| LSR           | -2.291188301 | 4.772256075 | 1.26E-50 | 4.01E-48 | 105.09944  |
| MUS81         | -1.421901776 | 5.522765301 | 1.35E-50 | 4.25E-48 | 105.028056 |
| HHAT          | -1.615153587 | 3.481836933 | 3.56E-50 | 1.10E-47 | 104.064855 |
| MEAF6         | -1.406968929 | 5.098547229 | 3.83E-50 | 1.17E-47 | 103.990579 |
| AL109706      | -1.385506094 | 3.344345208 | 4.19E-50 | 1.26E-47 | 103.901021 |
| PTPRM         | -1.467878173 | 3.373004858 | 4.78E-50 | 1.42E-47 | 103.769674 |
| POLR2D        | -1.712713158 | 3.984945205 | 5.65E-50 | 1.65E-47 | 103.603609 |
| PARP15        | -1.481447848 | 3.42764617  | 6.74E-50 | 1.95E-47 | 103.427312 |
| CTC-338M12.4  | -1.187540348 | 4.017747948 | 7.15E-50 | 2.04E-47 | 103.36909  |
| SLC30A6       | -1.461758228 | 5.005905041 | 8.86E-50 | 2.49E-47 | 103.15572  |
| ZCCHC18       | -1.898690216 | 4.411669431 | 9.54E-50 | 2.62E-47 | 103.081477 |
| FUT8          | -1.158125224 | 4.172631088 | 1.01E-49 | 2.74E-47 | 103.023384 |
| LOC101928708  | -1.602159402 | 3.718919033 | 1.17E-49 | 3.09E-47 | 102.87866  |
| DNAJC14       | -1.542273163 | 5.15283157  | 1.49E-49 | 3.89E-47 | 102.636961 |
| ZNF85         | -1.067872088 | 3.493776097 | 1.58E-49 | 4.07E-47 | 102.579326 |
| RP11-45M22.3  | -1.331639483 | 5.199004182 | 1.65E-49 | 4.21E-47 | 102.533424 |
| ZNF717        | -1.166478746 | 4.137398811 | 1.67E-49 | 4.21E-47 | 102.523325 |
| FAM149B1      | -1.007765413 | 3.517306324 | 1.93E-49 | 4.81E-47 | 102.378708 |
| WEE1          | -1.5395708   | 4.281599297 | 1.96E-49 | 4.82E-47 | 102.363692 |
| RP5-1085F17.3 | -1.246645751 | 5.279127743 | 2.22E-49 | 5.39E-47 | 102.240804 |
| ADAT2         | -1.13465494  | 3.95714032  | 2.48E-49 | 5.96E-47 | 102.130955 |
| EXOSC6        | -1.364352639 | 4.660633623 | 3.29E-49 | 7.82E-47 | 101.847997 |
| RP11-454F8.2  | -1.446596892 | 4.010690134 | 3.86E-49 | 9.08E-47 | 101.68864  |
| SEC22C        | -1.084914282 | 4.853189607 | 4.77E-49 | 1.11E-46 | 101.476408 |
| ZNF329        | -1.998724229 | 3.859262108 | 5.38E-49 | 1.24E-46 | 101.357602 |
| LIN52         | -1.34650126  | 4.668805168 | 7.15E-49 | 1.60E-46 | 101.072969 |
| ZBED4         | -1.695341213 | 3.802254524 | 1.06E-48 | 2.28E-46 | 100.685201 |
| RP4-714D9.5   | -1.663105518 | 3.52004857  | 1.56E-48 | 3.34E-46 | 100.297485 |
| MTA3          | -1.16992634  | 4.564782374 | 1.62E-48 | 3.45E-46 | 100.254649 |
| ZNF30         | -1.590245907 | 3.397216346 | 1.70E-48 | 3.54E-46 | 100.209451 |
| HIGD2A        | -1.4470604   | 6.240600424 | 1.93E-48 | 3.97E-46 | 100.084438 |
| ZBED6CL       | -1.594292737 | 5.669429282 | 2.57E-48 | 5.25E-46 | 99.7977292 |
| TDRD3         | -1.320750343 | 3.595441477 | 3.19E-48 | 6.45E-46 | 99.58253   |
| SEC24B-AS1    | -1.870214573 | 4.105530855 | 3.41E-48 | 6.84E-46 | 99.514667  |
| APEX2         | -1.241730451 | 5.609551429 | 3.57E-48 | 7.09E-46 | 99.4697674 |
| MRPL44        | -1.962016834 | 4.106334863 | 3.74E-48 | 7.36E-46 | 99.423686  |
| DNAJC27       | -1.13109129  | 3.859249073 | 4.08E-48 | 7.90E-46 | 99.335228  |
| RAB9B         | -1.389349324 | 3.756591557 | 4.70E-48 | 9.00E-46 | 99.1957533 |
| UCKL1         | -1.101324255 | 5.651294747 | 5.31E-48 | 1.01E-45 | 99.0724918 |
| GRAMD4        | -1.242082481 | 5.2491389   | 6.01E-48 | 1.13E-45 | 98.9495069 |
| LINC01278     | -1.471016044 | 4.479961532 | 6.27E-48 | 1.17E-45 | 98.90771   |
| TMEM169       | -1.36036616  | 3.872289076 | 9.34E-48 | 1.73E-45 | 98.5100929 |
| RXRB          | -1.231277604 | 5.65923959  | 9.93E-48 | 1.81E-45 | 98.4482533 |
| DNAAF2        | -2.179677485 | 3.023420874 | 9.93E-48 | 1.81E-45 | 98.4482229 |
| ZSCAN25       | -1.194431976 | 5.271632678 | 1.19E-47 | 2.15E-45 | 98.2653322 |
| NAF1          | -1.832060537 | 2.927884206 | 1.21E-47 | 2.16E-45 | 98.2530129 |
| LOC101929787  | -1.99890882  | 3.466325543 | 1.35E-47 | 2.40E-45 | 98.1392231 |
| MBIP          | -1.559926256 | 3.070088837 | 1.51E-47 | 2.66E-45 | 98.029402  |
| AC114730.11   | 1.172833623  | 3.840967236 | 2.05E-47 | 3.55E-45 | 97.7246869 |
| USP21         | -1.489220511 | 6.106421485 | 2.35E-47 | 4.04E-45 | 97.5880812 |
| SPATA2        | -1.471267413 | 4.966947876 | 2.37E-47 | 4.04E-45 | 97.5804526 |
| LINC00928     | -1.374452221 | 3.726719063 | 2.48E-47 | 4.19E-45 | 97.5371265 |

|               |              |             |          |          |            |
|---------------|--------------|-------------|----------|----------|------------|
| PPP1R14D      | 1.640621679  | 5.083354495 | 2.82E-47 | 4.73E-45 | 97.4088068 |
| FKRP          | -1.207868027 | 5.060583406 | 3.03E-47 | 5.01E-45 | 97.3349633 |
| DUSP10        | -1.295710616 | 4.853437019 | 4.11E-47 | 6.70E-45 | 97.0319604 |
| HELQ          | -1.329168634 | 3.973829511 | 4.11E-47 | 6.70E-45 | 97.0300972 |
| SLC9B2        | -1.433052192 | 4.144693821 | 4.30E-47 | 6.94E-45 | 96.9871399 |
| ZSCAN22       | -1.539202905 | 4.026478734 | 4.75E-47 | 7.62E-45 | 96.887227  |
| GTF2I         | -1.529871542 | 3.466802383 | 5.57E-47 | 8.87E-45 | 96.7274353 |
| ING1          | -1.553582    | 5.113461611 | 6.15E-47 | 9.72E-45 | 96.6294482 |
| GLTSCR1       | -1.297653302 | 5.768496582 | 6.82E-47 | 1.06E-44 | 96.5263476 |
| BRD1          | -2.479110065 | 4.75329296  | 9.60E-47 | 1.48E-44 | 96.1844792 |
| ZNF440        | -1.164795303 | 3.23109322  | 1.19E-46 | 1.83E-44 | 95.9659817 |
| TMCO4         | -1.221011225 | 5.476924421 | 1.25E-46 | 1.91E-44 | 95.9182309 |
| SCAI          | -1.091741905 | 3.350404902 | 1.30E-46 | 1.96E-44 | 95.8842629 |
| DDX52         | -1.264131461 | 4.376038983 | 1.57E-46 | 2.36E-44 | 95.6952208 |
| TRIM32        | -1.180148392 | 4.096906894 | 1.66E-46 | 2.47E-44 | 95.6399073 |
| ATE1          | -1.113540778 | 4.11312206  | 1.67E-46 | 2.48E-44 | 95.6298505 |
| LOC101928954  | -1.443804859 | 4.358590329 | 1.69E-46 | 2.49E-44 | 95.619922  |
| TIMM10B       | -1.60555357  | 5.181057573 | 1.88E-46 | 2.74E-44 | 95.5121518 |
| CDC23         | -1.702734094 | 3.670652047 | 2.01E-46 | 2.91E-44 | 95.4454221 |
| RP11-111M22.4 | -1.421132373 | 3.870152938 | 2.13E-46 | 3.05E-44 | 95.3895276 |
| CMTM4         | -1.042040905 | 4.447753133 | 2.32E-46 | 3.29E-44 | 95.3017945 |
| DNA2          | -1.858533005 | 3.303306305 | 2.64E-46 | 3.71E-44 | 95.1755994 |
| RALGAPA1      | -1.108409625 | 3.908983617 | 2.73E-46 | 3.81E-44 | 95.1413021 |
| C8orf37       | -1.213333359 | 2.922502901 | 2.78E-46 | 3.86E-44 | 95.123108  |
| ZBTB25        | -1.347738811 | 4.760207805 | 2.83E-46 | 3.90E-44 | 95.1057897 |
| GALNT12       | -1.650395884 | 3.885572686 | 2.87E-46 | 3.93E-44 | 95.0920709 |
| ABHD17C       | -1.518051978 | 3.739745403 | 3.89E-46 | 5.27E-44 | 94.7873238 |
| FAM73A        | -1.875611939 | 3.103493772 | 3.99E-46 | 5.37E-44 | 94.7609308 |
| WDR91         | -1.043284173 | 4.651145267 | 4.65E-46 | 6.17E-44 | 94.6100138 |
| NUBPL         | -1.795778314 | 3.311975442 | 5.14E-46 | 6.78E-44 | 94.5100697 |
| CNOT4         | -1.072485791 | 4.159295454 | 5.40E-46 | 7.09E-44 | 94.4599438 |
| RNH1          | -1.012314881 | 6.135293258 | 5.65E-46 | 7.37E-44 | 94.4146163 |
| LPAR5         | -1.639086024 | 4.761289699 | 6.64E-46 | 8.61E-44 | 94.2535765 |
| N4BP2L2-IT2   | -1.812378292 | 4.221038727 | 7.00E-46 | 9.03E-44 | 94.2001642 |
| FAM168A       | -1.621345891 | 4.988997833 | 7.57E-46 | 9.65E-44 | 94.1222756 |
| LSM11         | -1.024008898 | 3.79427263  | 8.28E-46 | 1.05E-43 | 94.0328264 |
| IL18          | -1.771099308 | 3.270724366 | 8.88E-46 | 1.12E-43 | 93.9628137 |
| STT3A         | -1.698031774 | 5.081178901 | 8.92E-46 | 1.12E-43 | 93.9586032 |
| NOM1          | -1.494546134 | 4.112157172 | 1.66E-45 | 2.01E-43 | 93.3411899 |
| CHD6          | -1.144007501 | 3.765949225 | 2.69E-45 | 3.26E-43 | 92.8547082 |
| WDR20         | -1.762504964 | 3.812879175 | 2.72E-45 | 3.27E-43 | 92.8464776 |
| ZNF792        | -1.279772014 | 2.742676553 | 3.12E-45 | 3.74E-43 | 92.7073376 |
| ERCC6L2       | -1.191732615 | 3.721951668 | 3.35E-45 | 3.96E-43 | 92.6382914 |
| ZNF548        | -1.082052001 | 4.357412847 | 3.41E-45 | 4.01E-43 | 92.620298  |
| LOC100506603  | -1.369102698 | 4.375347517 | 3.55E-45 | 4.16E-43 | 92.5784075 |
| SPRTN         | -1.600086981 | 2.821339039 | 4.33E-45 | 5.04E-43 | 92.3798525 |
| RP11-379F4.6  | -2.281170416 | 4.176369341 | 4.35E-45 | 5.04E-43 | 92.3760671 |
| YWHAE         | -1.763461462 | 6.165295131 | 4.86E-45 | 5.60E-43 | 92.2646481 |
| RP11-53O19.3  | -1.707293124 | 3.441395356 | 5.40E-45 | 6.19E-43 | 92.1594199 |
| KDEL2         | -1.743905239 | 3.977500206 | 5.58E-45 | 6.36E-43 | 92.1265893 |
| FW340027      | -2.366760472 | 4.253216847 | 6.00E-45 | 6.80E-43 | 92.0548554 |
| CYP2R1        | -1.251612272 | 3.750881346 | 6.90E-45 | 7.78E-43 | 91.9152911 |
| SMKR1         | -1.245789483 | 2.824664587 | 7.86E-45 | 8.82E-43 | 91.7851757 |
| ZNF382        | -1.029513448 | 2.765204932 | 8.37E-45 | 9.32E-43 | 91.7223735 |
| LINC00865     | -1.165141561 | 3.736261378 | 8.39E-45 | 9.32E-43 | 91.7194021 |
| DDX19B        | -1.532079928 | 4.735331523 | 9.66E-45 | 1.07E-42 | 91.5788316 |
| MAPKAPK2      | -1.138391507 | 6.208804841 | 9.98E-45 | 1.09E-42 | 91.5469292 |
| USP54         | -1.130552022 | 4.242449454 | 1.04E-44 | 1.13E-42 | 91.5027868 |

|              |              |             |          |          |            |
|--------------|--------------|-------------|----------|----------|------------|
| MRPS25       | -1.050250462 | 5.243548315 | 1.14E-44 | 1.23E-42 | 91.4099309 |
| GOPC         | -1.296998774 | 4.223324317 | 1.32E-44 | 1.41E-42 | 91.26976   |
| ZNF507       | -1.102512748 | 3.890802642 | 1.39E-44 | 1.47E-42 | 91.2170318 |
| MCM3AP-AS1   | -1.223911399 | 3.17306646  | 1.44E-44 | 1.52E-42 | 91.1783751 |
| RP11-410C4.5 | -1.419369887 | 4.664321823 | 1.49E-44 | 1.57E-42 | 91.1444354 |
| IPPK         | -1.229073406 | 5.170494756 | 1.52E-44 | 1.59E-42 | 91.1278355 |
| LEAP2        | -1.696173615 | 4.9767518   | 1.62E-44 | 1.69E-42 | 91.0629192 |
| CCDC66       | -1.594972536 | 3.396659563 | 1.74E-44 | 1.80E-42 | 90.9896226 |
| DKFZp564H213 | -1.36587367  | 3.658834792 | 1.75E-44 | 1.80E-42 | 90.9838592 |
| DHCR7        | -1.116466662 | 4.568657872 | 1.96E-44 | 2.00E-42 | 90.8718112 |
| SLC35F2      | -1.266231125 | 4.130804153 | 2.27E-44 | 2.29E-42 | 90.7250834 |
| TBC1D24      | -1.452547108 | 3.890774997 | 3.53E-44 | 3.52E-42 | 90.2838758 |
| LINC00342    | -1.671681253 | 4.654371312 | 4.02E-44 | 3.99E-42 | 90.1547935 |
| FMO5         | -1.13567492  | 3.718407423 | 4.38E-44 | 4.33E-42 | 90.0685013 |
| RP11-121C2.2 | -1.742799793 | 3.956897538 | 4.56E-44 | 4.49E-42 | 90.0288584 |
| SIGMAR1      | -1.28415658  | 5.491016148 | 4.78E-44 | 4.69E-42 | 89.9805121 |
| TMEM14A      | -2.422154881 | 4.526964405 | 6.39E-44 | 6.18E-42 | 89.6906852 |
| POLG2        | -1.26177455  | 5.52813604  | 9.25E-44 | 8.90E-42 | 89.322034  |
| SPDL1        | -1.305158025 | 3.380445253 | 1.05E-43 | 1.00E-41 | 89.1967499 |
| PITPNM2      | -1.039059687 | 4.87159549  | 1.09E-43 | 1.04E-41 | 89.1549082 |
| ERLIN2       | -1.551736491 | 3.826311937 | 1.18E-43 | 1.12E-41 | 89.0815139 |
| POLR1B       | -1.531953903 | 5.004697308 | 1.38E-43 | 1.29E-41 | 88.9220499 |
| ITGA10       | -1.092152306 | 4.959412845 | 1.66E-43 | 1.54E-41 | 88.7360399 |
| ZSCAN9       | -1.106327765 | 4.093349715 | 1.73E-43 | 1.60E-41 | 88.6974563 |
| ZNF284       | -1.009568409 | 5.226661748 | 1.79E-43 | 1.65E-41 | 88.6592386 |
| TNFRSF10D    | -1.015116221 | 3.87029131  | 1.96E-43 | 1.80E-41 | 88.5727403 |
| CHIC1        | -1.045788095 | 3.427464515 | 1.98E-43 | 1.81E-41 | 88.5604376 |
| ARHGEF9      | -1.416310713 | 4.002472293 | 1.99E-43 | 1.81E-41 | 88.5552521 |
| VPS13A       | -1.583674055 | 3.867003499 | 2.07E-43 | 1.88E-41 | 88.5147624 |
| WDYHV1       | -1.889905259 | 3.643406975 | 2.35E-43 | 2.11E-41 | 88.3886751 |
| MSANTD3      | -1.154952768 | 5.079516624 | 2.89E-43 | 2.54E-41 | 88.183587  |
| RNF8         | -1.027613194 | 4.516675845 | 2.94E-43 | 2.58E-41 | 88.1662959 |
| POLR3F       | -1.435064041 | 3.808560707 | 3.25E-43 | 2.84E-41 | 88.0642548 |
| ACTR5        | -1.284983084 | 5.346830801 | 3.43E-43 | 2.97E-41 | 88.0129997 |
| SS18         | -1.160183538 | 3.936206834 | 3.43E-43 | 2.97E-41 | 88.0112625 |
| YIPF4        | -1.613945965 | 3.728111569 | 3.46E-43 | 2.98E-41 | 88.0041488 |
| USP30        | -1.512477073 | 4.19710164  | 4.41E-43 | 3.77E-41 | 87.7612481 |
| FBXL12       | -1.032606355 | 5.581195389 | 4.63E-43 | 3.95E-41 | 87.7109001 |
| IQCE         | -1.227627718 | 4.60952685  | 4.72E-43 | 4.00E-41 | 87.6934073 |
| UBTD2        | -1.993247381 | 4.124970382 | 5.10E-43 | 4.29E-41 | 87.6159511 |
| CDK13        | -1.196638704 | 5.586428545 | 5.69E-43 | 4.77E-41 | 87.5064635 |
| PEX1         | -1.841017378 | 3.538952976 | 5.83E-43 | 4.86E-41 | 87.4814243 |
| MED14        | -1.094806381 | 3.876264281 | 6.29E-43 | 5.22E-41 | 87.4058944 |
| BAP1         | -1.389174796 | 6.064936001 | 6.56E-43 | 5.42E-41 | 87.3633731 |
| ALDH18A1     | -1.512630024 | 4.938138778 | 7.06E-43 | 5.81E-41 | 87.290383  |
| APIP         | -1.487912921 | 3.230929431 | 7.24E-43 | 5.93E-41 | 87.2655523 |
| NASP         | -1.271332936 | 5.909882349 | 7.34E-43 | 5.98E-41 | 87.2505131 |
| NHLRC3       | -1.618543243 | 3.506885776 | 7.35E-43 | 5.98E-41 | 87.2499153 |
| TADA1        | -1.436340534 | 3.567028661 | 7.50E-43 | 6.08E-41 | 87.229843  |
| ACTR1B       | -1.184009693 | 7.108416182 | 7.92E-43 | 6.40E-41 | 87.1755913 |
| IPMK         | -1.335145239 | 3.218511048 | 9.12E-43 | 7.34E-41 | 87.0342644 |
| RAD51D       | -1.359892308 | 4.459931456 | 9.15E-43 | 7.34E-41 | 87.0307859 |
| GGCX         | -1.061886537 | 4.561848463 | 9.58E-43 | 7.63E-41 | 86.9848096 |
| CTPS2        | -1.065611025 | 3.653080554 | 1.05E-42 | 8.30E-41 | 86.8929773 |
| RAB30        | -1.40357588  | 4.071559743 | 1.14E-42 | 9.02E-41 | 86.8067314 |
| RSPH3        | -1.238602599 | 5.388636593 | 1.17E-42 | 9.15E-41 | 86.7878663 |
| ODF2         | -1.373571413 | 4.4023336   | 1.19E-42 | 9.27E-41 | 86.7677889 |
| CCP110       | -1.493766899 | 4.369038266 | 1.32E-42 | 1.02E-40 | 86.6676494 |

|               |              |             |          |          |            |
|---------------|--------------|-------------|----------|----------|------------|
| FAM173B       | -1.223742907 | 4.143949257 | 1.33E-42 | 1.03E-40 | 86.6592412 |
| TIMM23B       | -2.008782446 | 4.087490673 | 1.68E-42 | 1.29E-40 | 86.4215023 |
| SEC24D        | -1.487482673 | 3.699958919 | 1.93E-42 | 1.47E-40 | 86.286464  |
| ABCC1         | -1.509110297 | 5.627044079 | 1.99E-42 | 1.51E-40 | 86.2545995 |
| CWC22         | -1.870889326 | 4.010821082 | 2.32E-42 | 1.75E-40 | 86.1011229 |
| GAB3          | -1.181095297 | 5.610391261 | 2.34E-42 | 1.76E-40 | 86.0917017 |
| CSRNP2        | -1.326948827 | 4.921889002 | 2.41E-42 | 1.81E-40 | 86.0627969 |
| METTL21B      | -1.364360717 | 3.929145962 | 2.67E-42 | 1.99E-40 | 85.9604446 |
| SDF4          | -1.331455287 | 7.570098249 | 2.82E-42 | 2.10E-40 | 85.9058602 |
| CHORDC1       | -1.869212532 | 3.637271297 | 2.93E-42 | 2.16E-40 | 85.8678889 |
| ZNF701        | -1.261409571 | 4.213815072 | 3.02E-42 | 2.21E-40 | 85.8383172 |
| PDSS1         | -1.422969263 | 4.890154371 | 3.19E-42 | 2.33E-40 | 85.7836003 |
| ZNF623        | -1.792534809 | 3.43973131  | 3.24E-42 | 2.36E-40 | 85.7673664 |
| SETBP1        | -1.375390122 | 4.678449581 | 3.28E-42 | 2.38E-40 | 85.7538514 |
| RP11-252E.1   | -1.185769222 | 4.351390926 | 3.50E-42 | 2.53E-40 | 85.6880608 |
| UBASH3B       | -1.142975034 | 4.454253008 | 3.51E-42 | 2.53E-40 | 85.6870723 |
| THUMPD2       | -1.442743133 | 3.818879406 | 4.00E-42 | 2.86E-40 | 85.5554144 |
| NFS1          | -1.128107159 | 4.446631177 | 4.11E-42 | 2.92E-40 | 85.5298635 |
| ARMCX1        | -1.196513367 | 2.649682328 | 4.15E-42 | 2.94E-40 | 85.5182975 |
| LOC100505564  | -1.488245494 | 3.58067903  | 4.17E-42 | 2.94E-40 | 85.5150658 |
| FDXACB1       | -1.292436803 | 4.268826247 | 4.28E-42 | 3.00E-40 | 85.4885084 |
| CCDC64        | -1.111001496 | 4.542709881 | 4.48E-42 | 3.13E-40 | 85.4414683 |
| LOC101928963  | -1.589804302 | 3.006297396 | 5.13E-42 | 3.57E-40 | 85.3066551 |
| CYP27B1       | -1.485716419 | 4.290348782 | 5.31E-42 | 3.68E-40 | 85.2731094 |
| FAM84B        | -1.297110852 | 4.839086177 | 5.52E-42 | 3.81E-40 | 85.2330364 |
| C1orf216      | -1.691947372 | 5.412186734 | 5.99E-42 | 4.10E-40 | 85.1522169 |
| CARNS1        | -1.450465238 | 5.322029617 | 6.46E-42 | 4.41E-40 | 85.0765035 |
| TMEM206       | -1.257223135 | 3.922746928 | 6.55E-42 | 4.46E-40 | 85.0630282 |
| KCTD13        | -1.301988308 | 5.363902442 | 7.30E-42 | 4.96E-40 | 84.9537231 |
| MTM1          | -1.635502823 | 3.056927632 | 9.08E-42 | 6.01E-40 | 84.7359653 |
| NNT           | -1.397304785 | 4.332426338 | 9.93E-42 | 6.56E-40 | 84.6466736 |
| FAM208B       | -1.511317147 | 4.418332912 | 9.99E-42 | 6.57E-40 | 84.6410162 |
| LOC221272     | -1.193231055 | 3.155686428 | 1.08E-41 | 7.09E-40 | 84.5621585 |
| DBP           | -1.130723008 | 5.53725404  | 1.22E-41 | 7.99E-40 | 84.4390758 |
| PIAS3         | -1.474225652 | 4.735615402 | 1.35E-41 | 8.77E-40 | 84.3409899 |
| LOC101927416  | -1.055834346 | 3.46190763  | 1.37E-41 | 8.89E-40 | 84.3242885 |
| LOC100130428  | -1.217243702 | 3.183161987 | 1.39E-41 | 9.01E-40 | 84.3077064 |
| EIF1AD        | -1.145622588 | 5.599161016 | 1.45E-41 | 9.34E-40 | 84.2689679 |
| CCDC77        | -1.332993297 | 3.525517859 | 1.58E-41 | 1.01E-39 | 84.1846384 |
| KLC2          | -1.672680651 | 5.184477713 | 1.60E-41 | 1.02E-39 | 84.1708561 |
| LMAN1         | -1.321684956 | 4.524663892 | 1.70E-41 | 1.08E-39 | 84.1102497 |
| NCL           | -1.246459411 | 6.108296113 | 1.78E-41 | 1.13E-39 | 84.0604767 |
| C6orf203      | -1.690353521 | 3.643898609 | 2.05E-41 | 1.28E-39 | 83.9238397 |
| AKAP8         | -1.158988658 | 5.829870023 | 2.07E-41 | 1.29E-39 | 83.9119481 |
| CPSF2         | -1.891600079 | 4.47984068  | 2.61E-41 | 1.61E-39 | 83.6818912 |
| GDI1          | -1.548870805 | 8.170110232 | 2.71E-41 | 1.67E-39 | 83.6431382 |
| TMTC2         | -1.130659825 | 3.70878514  | 2.74E-41 | 1.68E-39 | 83.6319435 |
| BTBD17        | 1.423864987  | 5.046577906 | 2.79E-41 | 1.71E-39 | 83.6122038 |
| RP11-157B13.7 | -1.173225419 | 4.050997389 | 2.91E-41 | 1.77E-39 | 83.5728978 |
| VPS45         | -1.039744324 | 5.619822997 | 3.09E-41 | 1.88E-39 | 83.5105408 |
| PRR3          | -1.463360462 | 4.892611113 | 3.21E-41 | 1.94E-39 | 83.472749  |
| ZNF230        | -1.313093465 | 3.841970341 | 3.24E-41 | 1.96E-39 | 83.4626392 |
| COQ10A        | -1.423333877 | 5.891678328 | 3.45E-41 | 2.08E-39 | 83.4004006 |
| KIAA1407      | -1.416001952 | 3.980174322 | 3.60E-41 | 2.15E-39 | 83.3585717 |
| ARMC2         | -1.259847106 | 3.200390138 | 3.94E-41 | 2.35E-39 | 83.268395  |
| SASS6         | -1.296520037 | 2.932208815 | 3.95E-41 | 2.35E-39 | 83.2646218 |
| CHKA          | -1.010111898 | 4.833028462 | 4.06E-41 | 2.41E-39 | 83.2373319 |
| CIAO1         | -1.323612531 | 5.480389975 | 4.08E-41 | 2.42E-39 | 83.2320744 |

|               |              |             |          |          |            |
|---------------|--------------|-------------|----------|----------|------------|
| FAM178A       | -1.212392676 | 4.625011535 | 4.27E-41 | 2.52E-39 | 83.1879316 |
| MRPL42        | -1.652487345 | 4.078591809 | 4.61E-41 | 2.70E-39 | 83.1108577 |
| RELA          | -1.350728478 | 6.776522164 | 4.64E-41 | 2.71E-39 | 83.103836  |
| ZCCHC9        | -2.120691344 | 5.043248703 | 4.66E-41 | 2.72E-39 | 83.0993996 |
| CYP26A1       | 1.252620272  | 4.448143641 | 4.97E-41 | 2.89E-39 | 83.0355531 |
| PHAX          | -1.809245539 | 4.5202657   | 5.08E-41 | 2.93E-39 | 83.0136433 |
| USP53         | -1.330395901 | 3.020412158 | 5.17E-41 | 2.98E-39 | 82.9961002 |
| LOC101928483  | -1.311810557 | 4.22980574  | 5.44E-41 | 3.13E-39 | 82.9451553 |
| HOMER1        | -1.127859056 | 3.777475728 | 5.52E-41 | 3.16E-39 | 82.9309341 |
| MTMR2         | -1.107534231 | 4.337672467 | 5.61E-41 | 3.20E-39 | 82.9153775 |
| PSRC1         | -1.326699676 | 5.189358563 | 5.64E-41 | 3.21E-39 | 82.9092708 |
| RPE           | -1.245644062 | 3.60071558  | 5.76E-41 | 3.27E-39 | 82.8891506 |
| UBAP2L        | -1.035382143 | 6.06976449  | 6.15E-41 | 3.48E-39 | 82.823357  |
| ELP4          | -1.345225651 | 5.322212815 | 6.19E-41 | 3.49E-39 | 82.8166909 |
| TTC8          | -1.0642592   | 3.163202051 | 6.39E-41 | 3.59E-39 | 82.784395  |
| ZNF512B       | -1.215301764 | 3.662319606 | 6.86E-41 | 3.85E-39 | 82.714108  |
| TRAF1         | -1.096910495 | 4.732428003 | 7.08E-41 | 3.96E-39 | 82.6817819 |
| RP11-5C23.1   | -1.76296299  | 4.863308528 | 7.35E-41 | 4.08E-39 | 82.6440704 |
| LCT           | -1.141342287 | 3.960888731 | 7.40E-41 | 4.10E-39 | 82.6372562 |
| LOC101930097  | -1.290396004 | 5.274461586 | 7.83E-41 | 4.33E-39 | 82.5809402 |
| DOCK9         | -1.02274113  | 4.10671154  | 8.78E-41 | 4.82E-39 | 82.4671623 |
| FAM63B        | -1.787900982 | 4.099237496 | 9.68E-41 | 5.29E-39 | 82.3691507 |
| AX747405      | -1.224294891 | 3.63789129  | 1.02E-40 | 5.56E-39 | 82.3177453 |
| COX17         | -1.839282855 | 3.872109097 | 1.23E-40 | 6.67E-39 | 82.1307711 |
| NDRG3         | -1.463800331 | 5.82019739  | 1.49E-40 | 8.02E-39 | 81.9407915 |
| CCDC134       | -1.079740698 | 4.579534763 | 1.51E-40 | 8.14E-39 | 81.9230518 |
| PEX14         | -1.190821343 | 4.825936052 | 1.55E-40 | 8.33E-39 | 81.8973646 |
| WDR5B         | -1.204442531 | 3.710704282 | 1.57E-40 | 8.44E-39 | 81.8826225 |
| RP11-326I11.5 | -1.351710242 | 3.268315722 | 1.68E-40 | 8.97E-39 | 81.8190926 |
| LOC101927620  | -1.539304161 | 4.306675963 | 2.84E-40 | 1.49E-38 | 81.292152  |
| FAM86C1       | -1.325846375 | 3.615333297 | 2.93E-40 | 1.53E-38 | 81.2608759 |
| FKSG29        | -1.093894219 | 3.448032604 | 2.95E-40 | 1.54E-38 | 81.2552569 |
| ATP10B        | -1.204789092 | 4.243016706 | 3.17E-40 | 1.65E-38 | 81.1816264 |
| ZNF827        | -1.248986567 | 4.579456448 | 3.35E-40 | 1.74E-38 | 81.1267918 |
| C1QTNF3       | -1.042210783 | 4.141706198 | 4.49E-40 | 2.31E-38 | 80.8349698 |
| STK36         | -1.052099514 | 5.125466277 | 5.67E-40 | 2.91E-38 | 80.6008573 |
| VAPB          | -1.290737292 | 5.196934298 | 5.96E-40 | 3.05E-38 | 80.5513323 |
| STRIP1        | -1.604295469 | 6.203787786 | 6.09E-40 | 3.11E-38 | 80.5284587 |
| NUP160        | -1.666418175 | 3.678292255 | 6.51E-40 | 3.31E-38 | 80.462693  |
| FDX1          | -1.679463324 | 4.120103212 | 6.77E-40 | 3.43E-38 | 80.422674  |
| ZNF486        | -1.089691576 | 3.59907827  | 6.93E-40 | 3.50E-38 | 80.3996818 |
| CTD-2528L19.6 | -1.583176659 | 2.86626152  | 7.38E-40 | 3.70E-38 | 80.3362283 |
| ZNF25         | -1.132430666 | 3.64661965  | 7.42E-40 | 3.70E-38 | 80.3306351 |
| NCAPD3        | -1.407454126 | 5.354008883 | 7.43E-40 | 3.70E-38 | 80.3304397 |
| CMSS1         | -1.607142403 | 4.428720515 | 7.49E-40 | 3.72E-38 | 80.3216733 |
| RP5-935K16.1  | -1.879544142 | 5.101951385 | 7.58E-40 | 3.75E-38 | 80.3102278 |
| ZNF831        | -1.595320143 | 4.08997235  | 7.96E-40 | 3.93E-38 | 80.2608149 |
| DSTYK         | -1.100916214 | 4.920833903 | 8.22E-40 | 4.05E-38 | 80.2289696 |
| FCRL1         | -2.02309561  | 4.183971396 | 8.38E-40 | 4.12E-38 | 80.2091234 |
| SPINT2        | -1.514986127 | 6.786777817 | 8.47E-40 | 4.15E-38 | 80.1985907 |
| DCAF17        | -1.251447806 | 3.014908341 | 8.49E-40 | 4.15E-38 | 80.1966442 |
| NELFB         | -1.814820736 | 5.288437307 | 9.07E-40 | 4.42E-38 | 80.1303838 |
| ZNF879        | -1.401884485 | 3.891643448 | 9.09E-40 | 4.42E-38 | 80.1279228 |
| ZNF490        | -1.337951291 | 4.518756882 | 9.38E-40 | 4.55E-38 | 80.0969767 |
| ZNF510        | -1.3511926   | 4.481488753 | 9.57E-40 | 4.64E-38 | 80.0768314 |
| RRN3P1        | -1.290036656 | 5.226010986 | 9.69E-40 | 4.69E-38 | 80.063851  |
| SRFBP1        | -2.046969267 | 3.545248904 | 9.98E-40 | 4.81E-38 | 80.0351429 |
| EGF           | -1.584091448 | 3.13264796  | 1.02E-39 | 4.88E-38 | 80.0159055 |

|              |              |             |          |          |            |
|--------------|--------------|-------------|----------|----------|------------|
| ING3         | -1.397334116 | 4.389200219 | 1.06E-39 | 5.07E-38 | 79.9751508 |
| MYBBP1A      | -1.077762253 | 4.876951828 | 1.12E-39 | 5.34E-38 | 79.9212578 |
| MREG         | -1.192236206 | 3.669902298 | 1.27E-39 | 6.00E-38 | 79.7936284 |
| SPTY2D1      | -1.942039672 | 4.621466084 | 1.35E-39 | 6.34E-38 | 79.7353978 |
| TMEM18       | -1.167434271 | 4.937754843 | 1.41E-39 | 6.61E-38 | 79.6911318 |
| MAPKAPK5-AS1 | -1.091124778 | 5.153216763 | 1.41E-39 | 6.61E-38 | 79.6886975 |
| C5orf30      | -1.270715359 | 3.847354768 | 1.45E-39 | 6.77E-38 | 79.6619137 |
| PRMT9        | -1.701752663 | 4.144341896 | 1.50E-39 | 7.00E-38 | 79.6254932 |
| TSEN54       | -1.237675767 | 6.583143648 | 1.61E-39 | 7.46E-38 | 79.5589368 |
| TRAF6        | -1.446513451 | 5.604118061 | 1.66E-39 | 7.69E-38 | 79.5268908 |
| AGGF1        | -1.760585362 | 4.555530197 | 1.69E-39 | 7.82E-38 | 79.5072844 |
| FNDC3B       | -1.957545545 | 3.322340716 | 1.70E-39 | 7.85E-38 | 79.5013453 |
| APCDD1L      | 1.379697198  | 5.836515626 | 1.74E-39 | 7.96E-38 | 79.4807142 |
| LOC338620    | -1.324531902 | 3.75711707  | 1.75E-39 | 8.03E-38 | 79.4705257 |
| ZSCAN26      | -1.983243917 | 4.491798299 | 1.84E-39 | 8.37E-38 | 79.4243068 |
| ZC3H14       | -1.250656669 | 4.706184994 | 1.94E-39 | 8.78E-38 | 79.3701019 |
| RNGTT        | -1.162501769 | 4.591749258 | 1.94E-39 | 8.79E-38 | 79.3670227 |
| TMEM64       | -1.688353142 | 3.67804888  | 2.11E-39 | 9.51E-38 | 79.2839757 |
| LINC00526    | -1.315163355 | 3.546554087 | 2.16E-39 | 9.70E-38 | 79.2622241 |
| PLXDC1       | -1.038452477 | 4.870389089 | 2.44E-39 | 1.09E-37 | 79.1392208 |
| CHAD         | -1.029604959 | 4.665721221 | 2.52E-39 | 1.12E-37 | 79.107386  |
| ZNF33B       | -1.193208742 | 3.625260725 | 2.60E-39 | 1.15E-37 | 79.075043  |
| DDX46        | -1.749859954 | 5.92095485  | 2.62E-39 | 1.16E-37 | 79.0693857 |
| SEC23IP      | -1.385513737 | 4.381307778 | 2.63E-39 | 1.16E-37 | 79.0633006 |
| KIAA1654     | -1.16288908  | 4.035815247 | 2.77E-39 | 1.22E-37 | 79.0127244 |
| DHFR         | -1.102104552 | 4.264795386 | 3.24E-39 | 1.42E-37 | 78.8573906 |
| PPHLN1       | -1.155959718 | 4.766346458 | 3.41E-39 | 1.49E-37 | 78.8058939 |
| HIVEP1       | -1.05541918  | 3.710864226 | 3.90E-39 | 1.70E-37 | 78.6700018 |
| IQCF5-AS1    | -1.240728864 | 3.881327456 | 3.94E-39 | 1.70E-37 | 78.6611026 |
| RP11-391M1.4 | -1.702707736 | 4.087821936 | 3.94E-39 | 1.70E-37 | 78.6602878 |
| GMPS         | -1.042540262 | 4.702935748 | 4.13E-39 | 1.78E-37 | 78.6131044 |
| ZNF765       | -1.547439279 | 4.205417593 | 4.36E-39 | 1.87E-37 | 78.5588732 |
| DSN1         | -1.857681568 | 4.133054479 | 4.55E-39 | 1.95E-37 | 78.5168755 |
| ZNF502       | -1.17267051  | 4.302167926 | 4.56E-39 | 1.95E-37 | 78.51325   |
| KLHL36       | -1.128906382 | 6.533105588 | 4.79E-39 | 2.04E-37 | 78.4646499 |
| LOC101929465 | -1.069882468 | 4.179024503 | 5.13E-39 | 2.18E-37 | 78.3970846 |
| LGMN         | -1.256492548 | 3.498008925 | 5.38E-39 | 2.28E-37 | 78.3495006 |
| CYB5B        | -1.007699397 | 4.276212797 | 6.27E-39 | 2.66E-37 | 78.1955102 |
| ZNF585A      | -1.061933503 | 3.974274673 | 6.72E-39 | 2.84E-37 | 78.1257018 |
| ALKBH1       | -1.146870562 | 4.81576248  | 7.20E-39 | 3.03E-37 | 78.0577776 |
| KRIT1        | -1.562787223 | 4.801984167 | 7.46E-39 | 3.14E-37 | 78.0211401 |
| FXN          | -1.126016009 | 4.296439067 | 7.93E-39 | 3.33E-37 | 77.9605949 |
| PIGS         | -1.108249221 | 7.085001958 | 8.00E-39 | 3.35E-37 | 77.9516293 |
| NR2C1        | -1.134286612 | 3.283771736 | 8.21E-39 | 3.43E-37 | 77.9263459 |
| ZNF251       | -1.076875918 | 4.035782697 | 8.42E-39 | 3.51E-37 | 77.899938  |
| ZNF542P      | -1.607050577 | 3.852468574 | 8.82E-39 | 3.67E-37 | 77.8535794 |
| LOC100128108 | -1.470868716 | 3.302706589 | 8.93E-39 | 3.70E-37 | 77.8419387 |
| ZNF778       | -1.034741311 | 3.359858392 | 9.77E-39 | 4.02E-37 | 77.7521056 |
| MSS51        | -1.580303842 | 3.516196351 | 9.81E-39 | 4.03E-37 | 77.7473256 |
| ZFX          | -1.354802263 | 3.641951668 | 1.06E-38 | 4.32E-37 | 77.6710486 |
| KDM5C        | -1.269086187 | 5.354577626 | 1.07E-38 | 4.37E-37 | 77.6563731 |
| KIF16B       | -1.074053976 | 3.251713204 | 1.11E-38 | 4.53E-37 | 77.6199772 |
| MOCS2        | -1.170523824 | 3.20562772  | 1.18E-38 | 4.78E-37 | 77.5642721 |
| RP11-416I2.1 | -1.154411501 | 3.371284365 | 1.49E-38 | 6.02E-37 | 77.3277326 |
| HMBOX1       | -1.024450771 | 5.787037329 | 1.65E-38 | 6.65E-37 | 77.2245246 |
| INPP5E       | -1.332979183 | 5.938737092 | 1.77E-38 | 7.09E-37 | 77.1565574 |
| PLGLB2       | -2.149836551 | 3.345046691 | 1.86E-38 | 7.39E-37 | 77.109411  |
| EFTUD2       | -1.029647799 | 6.173611169 | 1.91E-38 | 7.58E-37 | 77.0815714 |

|              |              |             |          |          |            |
|--------------|--------------|-------------|----------|----------|------------|
| KLHL18       | -1.018690594 | 5.484426998 | 2.09E-38 | 8.29E-37 | 76.9907386 |
| NAP1L2       | -1.394269546 | 2.852825618 | 2.26E-38 | 8.90E-37 | 76.9138349 |
| GOLGA1       | -1.333564206 | 5.563826397 | 2.28E-38 | 8.96E-37 | 76.9051006 |
| MFS6L        | -1.082588664 | 5.830627952 | 2.51E-38 | 9.86E-37 | 76.8074468 |
| ETV3         | -1.421352206 | 5.139307907 | 2.64E-38 | 1.04E-36 | 76.7570568 |
| NUDCD2       | -1.191410345 | 4.076312339 | 2.69E-38 | 1.05E-36 | 76.7369188 |
| TMEM53       | -1.121198134 | 5.029930607 | 2.69E-38 | 1.05E-36 | 76.7365022 |
| C5orf51      | -1.110424407 | 4.529722973 | 2.74E-38 | 1.07E-36 | 76.7193613 |
| XKRX         | -1.150785835 | 3.530420702 | 2.83E-38 | 1.10E-36 | 76.6871693 |
| LOC284513    | -1.438828885 | 3.958106021 | 2.86E-38 | 1.11E-36 | 76.6759523 |
| WHAMM        | -1.622969135 | 5.238905894 | 3.00E-38 | 1.16E-36 | 76.6277966 |
| ARF5         | -1.340650779 | 7.680710386 | 3.15E-38 | 1.22E-36 | 76.5803476 |
| LOC100293211 | -1.0077484   | 3.487104793 | 3.39E-38 | 1.30E-36 | 76.5076782 |
| EXTL2        | -1.32696451  | 3.99787373  | 3.39E-38 | 1.30E-36 | 76.507399  |
| SHQ1         | -1.717687872 | 4.640454359 | 3.79E-38 | 1.45E-36 | 76.394183  |
| USP44        | -1.236414982 | 2.970832139 | 3.81E-38 | 1.45E-36 | 76.3906228 |
| SOCS2        | -1.184844448 | 3.632786819 | 4.23E-38 | 1.61E-36 | 76.2836463 |
| RP5-1092A3.4 | -1.521544513 | 3.123517548 | 4.29E-38 | 1.63E-36 | 76.2697203 |
| RBM26        | -1.20352531  | 4.359567642 | 4.36E-38 | 1.65E-36 | 76.2533996 |
| PRUNE        | -1.308550905 | 5.088043279 | 4.41E-38 | 1.67E-36 | 76.2427211 |
| UBE2NL       | -1.171393018 | 7.044432714 | 5.11E-38 | 1.92E-36 | 76.0947609 |
| C10orf85     | -1.435573888 | 4.247049266 | 5.30E-38 | 1.98E-36 | 76.0585144 |
| LOC102723479 | -1.046386366 | 3.315992043 | 5.46E-38 | 2.03E-36 | 76.0301961 |
| LOC101930114 | -1.131865851 | 3.899961358 | 5.54E-38 | 2.06E-36 | 76.0152244 |
| CCDC104      | -1.238533275 | 3.549327347 | 5.57E-38 | 2.06E-36 | 76.0095994 |
| ZNF468       | -2.48983419  | 3.774732544 | 5.63E-38 | 2.08E-36 | 75.9986944 |
| RFC3         | -1.034735999 | 3.304512721 | 5.74E-38 | 2.12E-36 | 75.9786957 |
| RNASEH1      | -1.302893781 | 5.761008918 | 6.13E-38 | 2.26E-36 | 75.9127514 |
| PLCXD2       | -1.136477727 | 4.122074786 | 6.18E-38 | 2.27E-36 | 75.9059155 |
| FCF1         | -1.279400725 | 3.806703401 | 6.24E-38 | 2.29E-36 | 75.896233  |
| AKTIP        | -1.366818185 | 5.647463111 | 6.44E-38 | 2.36E-36 | 75.8636792 |
| MRPL30       | -1.110092503 | 5.09224937  | 6.55E-38 | 2.40E-36 | 75.8466268 |
| TBCCD1       | -1.593795725 | 3.794471044 | 6.69E-38 | 2.44E-36 | 75.8264575 |
| ANKRD33      | -1.209902776 | 3.7306681   | 6.73E-38 | 2.45E-36 | 75.8196028 |
| LINC00674    | -1.146485916 | 4.840077022 | 6.79E-38 | 2.47E-36 | 75.8105242 |
| TPT1-AS1     | -1.024962378 | 4.313439691 | 7.07E-38 | 2.57E-36 | 75.7710111 |
| USP24        | -1.585720803 | 5.475157979 | 7.18E-38 | 2.60E-36 | 75.7553936 |
| GPR19        | -1.448726658 | 3.922199787 | 7.65E-38 | 2.77E-36 | 75.6914091 |
| ZIC5         | 1.38691783   | 3.806607098 | 8.15E-38 | 2.93E-36 | 75.6277929 |
| FAM122A      | -1.19192369  | 5.174572382 | 8.25E-38 | 2.96E-36 | 75.6165714 |
| SFXN1        | -1.632574305 | 4.821450613 | 8.57E-38 | 3.06E-36 | 75.5780259 |
| ATP6V0A2     | -1.112135299 | 4.519681776 | 9.33E-38 | 3.31E-36 | 75.4926309 |
| RNF167       | -1.197028691 | 7.390265597 | 9.38E-38 | 3.33E-36 | 75.4872122 |
| SMPDL3A      | -1.174070053 | 3.504184541 | 9.51E-38 | 3.35E-36 | 75.4741105 |
| PLEKHA8P1    | -1.268817452 | 5.016233957 | 1.06E-37 | 3.71E-36 | 75.3670578 |
| CENPH        | -1.435684403 | 3.081599255 | 1.13E-37 | 3.95E-36 | 75.2984352 |
| PRICKLE3     | -1.373540929 | 4.39505611  | 1.25E-37 | 4.35E-36 | 75.197466  |
| LOC101929684 | -1.2248585   | 3.65899998  | 1.30E-37 | 4.51E-36 | 75.1590684 |
| SCAPER       | -1.332953497 | 4.424682367 | 1.42E-37 | 4.91E-36 | 75.0702346 |
| LACTB2       | -1.693838233 | 3.658179731 | 1.42E-37 | 4.91E-36 | 75.0689548 |
| RFXAP        | -1.336024541 | 3.830549879 | 1.43E-37 | 4.91E-36 | 75.068104  |
| MPHOSPH9     | -1.653310658 | 3.916280217 | 1.45E-37 | 4.95E-36 | 75.0542835 |
| MYO9B        | -1.075668389 | 6.697832919 | 1.46E-37 | 5.00E-36 | 75.044204  |
| TAF4B        | -1.268437229 | 3.751003793 | 1.47E-37 | 5.03E-36 | 75.0360124 |
| SGMS2        | -1.452670095 | 3.689520475 | 1.50E-37 | 5.10E-36 | 75.0189984 |
| CBLN2        | -1.145518211 | 3.761004645 | 1.50E-37 | 5.10E-36 | 75.0188647 |
| AP1B1        | 1.141013031  | 6.541551123 | 1.50E-37 | 5.10E-36 | 75.0158349 |
| IL1RAP       | -1.732589274 | 4.620055411 | 1.53E-37 | 5.20E-36 | 74.9949902 |



|               |              |             |          |          |            |
|---------------|--------------|-------------|----------|----------|------------|
| MYZAP         | -1.562514293 | 4.517246305 | 1.59E-37 | 5.39E-36 | 74.9562258 |
| FAM124B       | -1.172897044 | 3.660271204 | 1.61E-37 | 5.43E-36 | 74.946393  |
| TRPS1         | -1.00181525  | 4.952558469 | 1.67E-37 | 5.63E-36 | 74.9097815 |
| EP300         | -2.486411628 | 5.333328378 | 1.69E-37 | 5.69E-36 | 74.8968042 |
| TRRAP         | -1.76419314  | 5.097815919 | 1.88E-37 | 6.28E-36 | 74.7908241 |
| INPP5B        | -1.222924945 | 4.632915352 | 1.90E-37 | 6.33E-36 | 74.7813824 |
| LOC285147     | -1.818059662 | 3.664489975 | 1.92E-37 | 6.40E-36 | 74.7684666 |
| RP11-109G23.3 | -1.179193383 | 4.297204161 | 1.96E-37 | 6.51E-36 | 74.7478653 |
| WDR53         | -1.409743174 | 3.784607074 | 2.03E-37 | 6.72E-36 | 74.7146827 |
| RIC8B         | -1.013297105 | 4.862891483 | 2.16E-37 | 7.13E-36 | 74.6547175 |
| RNF170        | -1.35200183  | 4.68888035  | 2.18E-37 | 7.19E-36 | 74.6421602 |
| STRN          | -1.283550171 | 4.85524012  | 2.42E-37 | 7.95E-36 | 74.5386231 |
| NAPEPLD       | -1.148894321 | 4.291845831 | 2.44E-37 | 8.01E-36 | 74.5302264 |
| C15orf54      | -1.295565262 | 3.032588362 | 2.47E-37 | 8.10E-36 | 74.5173054 |
| FUT11         | -1.514539676 | 5.431420444 | 2.55E-37 | 8.35E-36 | 74.4858604 |
| SLC35B4       | -1.111097299 | 4.739318645 | 2.59E-37 | 8.45E-36 | 74.4714055 |
| PAICS         | -1.162333244 | 4.200830183 | 2.85E-37 | 9.27E-36 | 74.3751437 |
| PAN3-AS1      | -1.726891933 | 4.385930737 | 2.93E-37 | 9.51E-36 | 74.3462573 |
| C20orf194     | -1.074833982 | 5.743525855 | 2.96E-37 | 9.59E-36 | 74.3362982 |
| MRPS11        | -1.308855167 | 5.657212702 | 2.98E-37 | 9.64E-36 | 74.3293564 |
| PROSER1       | -2.089529848 | 4.518139295 | 3.15E-37 | 1.02E-35 | 74.2760457 |
| PPP2R2B       | -1.097300024 | 3.493716147 | 3.16E-37 | 1.02E-35 | 74.2728685 |
| TNRC6A        | -1.077674146 | 5.615936068 | 3.42E-37 | 1.10E-35 | 74.1913369 |
| ZMAT4         | -1.134194486 | 5.011375169 | 3.62E-37 | 1.15E-35 | 74.1353087 |
| PPP3CB-AS1    | -1.213047235 | 4.885991181 | 3.69E-37 | 1.17E-35 | 74.1171013 |
| REST          | -1.4256304   | 5.791704841 | 3.73E-37 | 1.18E-35 | 74.1054702 |
| GK5           | -1.111241211 | 2.743685456 | 3.77E-37 | 1.19E-35 | 74.0958072 |
| PATL1         | -1.042588651 | 5.367659851 | 3.89E-37 | 1.23E-35 | 74.0640625 |
| INPP5A        | -1.283483621 | 5.757581782 | 3.91E-37 | 1.23E-35 | 74.0588176 |
| ZNF57         | -1.32587314  | 3.573030449 | 3.92E-37 | 1.23E-35 | 74.0566439 |
| VPS41         | -1.38842716  | 4.735232874 | 3.92E-37 | 1.24E-35 | 74.0548819 |
| RP11-73M18.8  | -1.348474286 | 6.808531107 | 3.98E-37 | 1.25E-35 | 74.041612  |
| ZW10          | -1.44315096  | 5.321358995 | 4.00E-37 | 1.25E-35 | 74.0364136 |
| TPD52         | -1.822252092 | 3.777205247 | 4.15E-37 | 1.30E-35 | 73.9976072 |
| CTBP1         | -1.465976402 | 7.008781573 | 4.19E-37 | 1.31E-35 | 73.9882341 |
| RMDN1         | -1.448354549 | 4.252727313 | 4.22E-37 | 1.32E-35 | 73.9817523 |
| C12orf66      | -1.488488553 | 3.642947612 | 4.29E-37 | 1.34E-35 | 73.9655506 |
| MOGAT1        | -1.159740674 | 4.209931217 | 4.29E-37 | 1.34E-35 | 73.9651319 |
| OSGEPL1       | -1.71220642  | 4.596429371 | 4.38E-37 | 1.36E-35 | 73.9439021 |
| SMS           | -2.653231056 | 4.463611066 | 4.39E-37 | 1.36E-35 | 73.9434698 |
| NUP133        | -1.376944113 | 5.295979305 | 4.41E-37 | 1.37E-35 | 73.9383554 |
| HSF2          | -1.430854151 | 2.877671154 | 4.55E-37 | 1.41E-35 | 73.9056159 |
| SYTL2         | -2.05805143  | 4.933476765 | 4.64E-37 | 1.43E-35 | 73.8867392 |
| ESYT2         | -1.847115515 | 4.766086166 | 4.69E-37 | 1.44E-35 | 73.8766587 |
| C2orf43       | -1.319278145 | 4.969377728 | 4.80E-37 | 1.47E-35 | 73.8529782 |
| PEX12         | -1.353264954 | 5.172954888 | 5.40E-37 | 1.65E-35 | 73.7351013 |
| ADPGK         | -1.545184383 | 6.581428952 | 5.43E-37 | 1.66E-35 | 73.7290399 |
| SNAPC3        | -1.474822874 | 3.921798216 | 5.59E-37 | 1.70E-35 | 73.7003843 |
| RP11-355B11.2 | -1.434662414 | 3.638667594 | 5.80E-37 | 1.77E-35 | 73.6628096 |
| PCYT1A        | -1.094007505 | 5.64041857  | 5.97E-37 | 1.81E-35 | 73.6343715 |
| RP1-178F10.1  | -1.263064528 | 3.739489145 | 6.10E-37 | 1.85E-35 | 73.6128668 |
| C6orf57       | -1.23407946  | 3.438762971 | 6.17E-37 | 1.87E-35 | 73.6014811 |
| RP11-804H8.6  | -1.102042522 | 4.855998397 | 7.20E-37 | 2.16E-35 | 73.4468784 |
| MBTD1         | -2.033596426 | 5.054903496 | 7.34E-37 | 2.20E-35 | 73.4278055 |
| ZNF253        | -1.195874497 | 3.997277498 | 7.36E-37 | 2.20E-35 | 73.4256278 |
| ZNF189        | -1.927979841 | 5.138421536 | 7.74E-37 | 2.31E-35 | 73.3750522 |
| AGPAT4        | -1.096332639 | 4.156562479 | 8.18E-37 | 2.44E-35 | 73.3194415 |
| ITCH          | -1.331436941 | 4.447100499 | 8.76E-37 | 2.60E-35 | 73.2509128 |

|              |              |             |          |          |            |
|--------------|--------------|-------------|----------|----------|------------|
| CCDC127      | -1.126473398 | 4.844360125 | 8.77E-37 | 2.60E-35 | 73.2496459 |
| TTC13        | -1.914083846 | 6.194315304 | 8.82E-37 | 2.62E-35 | 73.2437499 |
| TARBP1       | -1.234595464 | 6.562687902 | 9.44E-37 | 2.80E-35 | 73.1760826 |
| TMEM68       | -1.028333284 | 3.233704521 | 1.09E-36 | 3.21E-35 | 73.0332443 |
| MRPL19       | -1.247697025 | 2.919953489 | 1.14E-36 | 3.36E-35 | 72.9862138 |
| ASUN         | -2.844363868 | 4.188514619 | 1.19E-36 | 3.49E-35 | 72.9452004 |
| MAZ          | -1.078727025 | 6.359393864 | 1.21E-36 | 3.56E-35 | 72.9246679 |
| DIDO1        | -1.14119777  | 5.714076636 | 1.23E-36 | 3.61E-35 | 72.9094883 |
| STAT5A       | -1.272122924 | 7.719538925 | 1.29E-36 | 3.75E-35 | 72.8661547 |
| DUSP14       | -1.089037953 | 4.286203432 | 1.30E-36 | 3.78E-35 | 72.8576795 |
| DLAT         | -1.735463129 | 3.881425135 | 1.32E-36 | 3.84E-35 | 72.8385222 |
| CDCA7        | -1.213786232 | 3.471851114 | 1.32E-36 | 3.84E-35 | 72.8382147 |
| LOC151657    | -1.47249218  | 5.478767089 | 1.52E-36 | 4.39E-35 | 72.6986957 |
| ZNF26        | -1.152719074 | 3.724776229 | 1.61E-36 | 4.64E-35 | 72.641109  |
| LOC100129361 | -1.121271109 | 4.220191931 | 1.72E-36 | 4.92E-35 | 72.5775339 |
| FAM64A       | -1.139023647 | 4.423841218 | 1.75E-36 | 5.01E-35 | 72.5575887 |
| CRKL         | -1.161536439 | 5.895435953 | 1.75E-36 | 5.01E-35 | 72.5571836 |
| SH2B3        | -2.021480064 | 6.77096542  | 1.83E-36 | 5.23E-35 | 72.5122929 |
| TTC27        | -1.132172308 | 5.119276381 | 1.83E-36 | 5.23E-35 | 72.5117787 |
| PDCD2L       | -1.194490891 | 4.572102024 | 1.92E-36 | 5.46E-35 | 72.4647486 |
| LOC101928370 | -1.432406352 | 3.392570081 | 2.15E-36 | 6.06E-35 | 72.3538227 |
| MYPN         | -1.12367438  | 4.153331224 | 2.15E-36 | 6.06E-35 | 72.3519137 |
| STAM2        | -1.375571266 | 4.426733337 | 2.21E-36 | 6.21E-35 | 72.325624  |
| ADAD2        | 1.538688697  | 5.757645104 | 2.25E-36 | 6.33E-35 | 72.306361  |
| MC4R         | -1.025627372 | 3.227251611 | 2.30E-36 | 6.44E-35 | 72.28532   |
| ZNF814       | -1.554988055 | 3.788610579 | 2.31E-36 | 6.48E-35 | 72.2783866 |
| SMCR8        | -1.058484531 | 5.513096688 | 2.33E-36 | 6.52E-35 | 72.2712653 |
| FAM213A      | -1.176049755 | 4.949000274 | 2.40E-36 | 6.71E-35 | 72.2405727 |
| RNFT1        | -2.162912144 | 4.124352859 | 2.49E-36 | 6.94E-35 | 72.2052458 |
| SEC14L1P1    | -1.229342271 | 3.368657945 | 2.63E-36 | 7.33E-35 | 72.1492343 |
| TCEAL1       | -1.4017831   | 3.6247124   | 2.65E-36 | 7.38E-35 | 72.1423596 |
| BOLA1        | -1.250120121 | 3.929695766 | 2.78E-36 | 7.70E-35 | 72.0960185 |
| MEST         | -1.8463567   | 3.575806897 | 2.95E-36 | 8.16E-35 | 72.0347749 |
| GTF3C3       | -1.301388259 | 3.669254555 | 3.07E-36 | 8.47E-35 | 71.9965218 |
| AGPAT5       | -1.886288432 | 4.026051151 | 3.26E-36 | 8.99E-35 | 71.9344058 |
| LRRC57       | -1.40763294  | 4.201746334 | 3.28E-36 | 9.03E-35 | 71.9277764 |
| KLHL20       | -1.099406421 | 4.326595927 | 3.30E-36 | 9.07E-35 | 71.9221129 |
| PRMT6        | -1.638694753 | 3.255183285 | 3.44E-36 | 9.43E-35 | 71.8813862 |
| LIMS1        | -1.441587483 | 4.245645009 | 3.46E-36 | 9.47E-35 | 71.8758915 |
| RBM28        | -1.531039012 | 5.36956043  | 3.58E-36 | 9.78E-35 | 71.8419254 |
| CCT6B        | -1.030907142 | 3.585046883 | 3.74E-36 | 1.02E-34 | 71.7974306 |
| DCUN1D4      | -1.424196186 | 3.7610798   | 4.30E-36 | 1.17E-34 | 71.6583311 |
| GLUD1        | -1.943656014 | 5.689223964 | 4.31E-36 | 1.17E-34 | 71.6557117 |
| C1orf204     | -1.063250908 | 4.610571222 | 4.67E-36 | 1.26E-34 | 71.5748551 |
| PRKCI        | -1.201947338 | 4.296399085 | 4.95E-36 | 1.34E-34 | 71.517538  |
| STK25        | -1.600679007 | 5.791593251 | 5.10E-36 | 1.37E-34 | 71.4872089 |
| RACGAP1      | -2.091305842 | 4.034123829 | 5.19E-36 | 1.40E-34 | 71.4701387 |
| ARL13B       | -1.233403695 | 2.643703267 | 5.34E-36 | 1.44E-34 | 71.441397  |
| UBE2Q1       | -1.02817917  | 5.239185772 | 5.60E-36 | 1.50E-34 | 71.3932847 |
| ZNF320       | -1.512709623 | 3.613615258 | 5.80E-36 | 1.55E-34 | 71.3582706 |
| HIST1H4E     | -1.381384746 | 4.346194369 | 5.87E-36 | 1.57E-34 | 71.3457307 |
| ZCCHC11      | -1.485539444 | 4.643080456 | 6.10E-36 | 1.62E-34 | 71.3075042 |
| SREK1        | -1.159878556 | 3.90571058  | 6.17E-36 | 1.64E-34 | 71.2964298 |
| ASXL2        | -1.084730727 | 5.645214733 | 6.52E-36 | 1.73E-34 | 71.2413439 |
| FAM89B       | -1.124093991 | 7.756153873 | 6.60E-36 | 1.75E-34 | 71.2292785 |
| CPT2         | -1.353798877 | 5.062733448 | 6.68E-36 | 1.77E-34 | 71.2169892 |
| C15orf57     | -1.190451213 | 4.927738619 | 6.85E-36 | 1.81E-34 | 71.1912418 |
| MUC13        | 1.039025141  | 4.564794838 | 7.24E-36 | 1.91E-34 | 71.1354179 |

|               |              |             |          |          |            |
|---------------|--------------|-------------|----------|----------|------------|
| F2R           | -1.480666208 | 5.250823981 | 7.63E-36 | 2.01E-34 | 71.0828132 |
| ARSG          | -1.296257832 | 5.166708538 | 7.66E-36 | 2.01E-34 | 71.0797046 |
| CLASP2        | -1.21792016  | 4.360122519 | 8.37E-36 | 2.19E-34 | 70.9909134 |
| CHN2          | -1.003252255 | 3.884687803 | 8.64E-36 | 2.26E-34 | 70.9587858 |
| TCF12         | -2.053550916 | 4.281270742 | 8.70E-36 | 2.27E-34 | 70.9521243 |
| KRTAP1-1      | -1.064862533 | 3.535555116 | 8.84E-36 | 2.31E-34 | 70.9357838 |
| DLG1          | -1.283108517 | 4.306067743 | 8.86E-36 | 2.31E-34 | 70.9338364 |
| ARL6IP6       | -1.641549112 | 4.587813475 | 8.88E-36 | 2.31E-34 | 70.930962  |
| PTBP2         | -1.239603803 | 2.767480207 | 9.25E-36 | 2.40E-34 | 70.8907558 |
| TXLNG         | -1.336026868 | 4.453350814 | 9.34E-36 | 2.43E-34 | 70.8803128 |
| GLCE          | -1.164555733 | 2.881171543 | 9.50E-36 | 2.46E-34 | 70.8633488 |
| TMEM44-AS1    | -1.066822696 | 4.284397997 | 9.51E-36 | 2.46E-34 | 70.8629366 |
| FAM204A       | -1.131549649 | 4.375880064 | 1.00E-35 | 2.60E-34 | 70.8078309 |
| CTPS1         | -1.2417256   | 4.47745555  | 1.04E-35 | 2.70E-34 | 70.7685661 |
| MARS2         | -1.181670949 | 4.336640591 | 1.08E-35 | 2.78E-34 | 70.7359578 |
| LOC101929668  | -1.372810779 | 5.806663464 | 1.13E-35 | 2.91E-34 | 70.6874847 |
| GMIP          | -1.246532193 | 6.531442052 | 1.14E-35 | 2.92E-34 | 70.683368  |
| LOC102606465  | -1.873503298 | 3.855165897 | 1.15E-35 | 2.94E-34 | 70.6741452 |
| KIAA1324L     | -1.049803795 | 3.827698338 | 1.20E-35 | 3.06E-34 | 70.6332693 |
| TMEM209       | -1.436506871 | 3.666698677 | 1.34E-35 | 3.42E-34 | 70.516529  |
| PXN           | -1.387686618 | 6.747614716 | 1.47E-35 | 3.74E-34 | 70.4232477 |
| DZIP3         | -1.107826398 | 4.306767653 | 1.49E-35 | 3.78E-34 | 70.4122116 |
| ZNF526        | -1.378017028 | 4.73484775  | 1.52E-35 | 3.84E-34 | 70.3928704 |
| FCHSD1        | -1.342908616 | 5.395570324 | 1.53E-35 | 3.87E-34 | 70.3852515 |
| SEMA4B        | -1.348748806 | 7.828562049 | 1.58E-35 | 3.99E-34 | 70.3517545 |
| RP11-416N2.4  | -1.044641863 | 3.674473251 | 1.59E-35 | 4.01E-34 | 70.3471206 |
| NEK4          | -1.351072737 | 3.698710506 | 1.65E-35 | 4.15E-34 | 70.3081398 |
| C2orf44       | -1.06327618  | 3.624706701 | 1.67E-35 | 4.19E-34 | 70.2970446 |
| ZNF84         | -1.442037461 | 4.60831097  | 1.74E-35 | 4.33E-34 | 70.2594705 |
| RCN1          | -1.27128433  | 3.39298474  | 1.74E-35 | 4.34E-34 | 70.2550963 |
| TTC39B        | -1.035541138 | 3.40615252  | 1.79E-35 | 4.45E-34 | 70.2292715 |
| LOC283861     | -1.122289438 | 3.655843452 | 2.01E-35 | 4.96E-34 | 70.1142782 |
| GABPB1        | -1.372788224 | 4.497131069 | 2.08E-35 | 5.13E-34 | 70.0795232 |
| ENO1-AS1      | -1.196853075 | 3.957018856 | 2.09E-35 | 5.15E-34 | 70.0723296 |
| PDSS2         | -1.164254098 | 4.776568762 | 2.14E-35 | 5.25E-34 | 70.0514503 |
| PER2          | -1.12893211  | 4.555068905 | 2.18E-35 | 5.34E-34 | 70.0340527 |
| HDDC2         | -1.868224931 | 4.594118312 | 2.29E-35 | 5.60E-34 | 69.9827213 |
| ABCG8         | -1.209289398 | 4.013832743 | 2.31E-35 | 5.65E-34 | 69.9729291 |
| RP11-470M17.2 | -1.03896422  | 3.776433799 | 2.39E-35 | 5.82E-34 | 69.9414752 |
| DEFA5         | -1.118328757 | 3.42484318  | 2.40E-35 | 5.85E-34 | 69.9337892 |
| DPY19L4       | -1.087020855 | 2.678451386 | 2.50E-35 | 6.08E-34 | 69.8931407 |
| COX5A         | -1.202010822 | 6.315125248 | 2.60E-35 | 6.31E-34 | 69.8539296 |
| ZNF738        | -1.00057062  | 2.805242138 | 2.61E-35 | 6.31E-34 | 69.8517064 |
| TAF1L         | -1.229652577 | 4.918515798 | 2.61E-35 | 6.31E-34 | 69.85127   |
| ARRDC1        | -1.093885689 | 5.78747353  | 2.72E-35 | 6.56E-34 | 69.8110154 |
| STARD9        | -1.144075456 | 3.63365033  | 2.81E-35 | 6.79E-34 | 69.7761216 |
| SGSH          | -1.07976664  | 6.436250474 | 2.84E-35 | 6.83E-34 | 69.7672441 |
| SLFNL1        | -1.038307535 | 4.187433269 | 2.85E-35 | 6.84E-34 | 69.7647915 |
| ARFGEF2       | -1.337247536 | 4.547148098 | 2.93E-35 | 7.03E-34 | 69.7359093 |
| CALB2         | 1.144421232  | 5.448086552 | 3.01E-35 | 7.22E-34 | 69.7091847 |
| TSPYL2        | -1.145787385 | 7.27459118  | 3.03E-35 | 7.25E-34 | 69.7031666 |
| ZNF512        | -1.468071898 | 7.010931424 | 3.10E-35 | 7.40E-34 | 69.6801106 |
| ZNF317        | -1.208661453 | 4.85872491  | 3.12E-35 | 7.44E-34 | 69.6724772 |
| GFM1          | -1.501906003 | 4.096028099 | 3.14E-35 | 7.47E-34 | 69.66614   |
| AP1G1         | -1.434129422 | 6.179932448 | 3.25E-35 | 7.71E-34 | 69.6322772 |
| LOC101929027  | -1.18696754  | 3.587441317 | 3.35E-35 | 7.93E-34 | 69.602     |
| DDX20         | -1.38702158  | 4.108770186 | 3.50E-35 | 8.27E-34 | 69.5571093 |
| C1orf159      | -1.432233002 | 5.474987434 | 3.64E-35 | 8.60E-34 | 69.5172054 |

|               |              |             |          |          |            |
|---------------|--------------|-------------|----------|----------|------------|
| BHLHB9        | -1.111668463 | 3.129004518 | 3.77E-35 | 8.88E-34 | 69.4829779 |
| EAF1          | -2.311077743 | 4.395739096 | 3.86E-35 | 9.07E-34 | 69.4593473 |
| CCDC50        | -1.245802783 | 4.087843607 | 4.05E-35 | 9.50E-34 | 69.4107992 |
| UPF3A         | -1.512535891 | 4.872535978 | 4.12E-35 | 9.65E-34 | 69.3941837 |
| FBXO3         | -1.075411082 | 3.164193066 | 4.55E-35 | 1.06E-33 | 69.2943016 |
| ONECUT1       | -1.134997172 | 3.64067389  | 4.77E-35 | 1.11E-33 | 69.2478072 |
| TESK2         | -1.15731821  | 6.400622728 | 5.21E-35 | 1.21E-33 | 69.1586365 |
| MYSM1         | -1.872152427 | 3.649713619 | 5.31E-35 | 1.23E-33 | 69.140235  |
| RAB26         | -1.051495193 | 4.617793264 | 5.35E-35 | 1.24E-33 | 69.1323913 |
| TAF5          | -1.861594528 | 4.120879589 | 5.49E-35 | 1.27E-33 | 69.1062087 |
| TFCP2         | -1.302916018 | 5.49915892  | 5.99E-35 | 1.38E-33 | 69.0194122 |
| IFFO1         | -1.286039795 | 6.96139793  | 6.31E-35 | 1.45E-33 | 68.9680667 |
| CWC25         | -1.114723184 | 6.018210928 | 6.54E-35 | 1.50E-33 | 68.931565  |
| SLC7A6        | -1.340353023 | 5.23623318  | 6.56E-35 | 1.50E-33 | 68.9281455 |
| SAE1          | -1.204948977 | 5.456743859 | 6.82E-35 | 1.56E-33 | 68.8892182 |
| PHTF1         | -1.103148065 | 4.060822307 | 7.10E-35 | 1.61E-33 | 68.8500137 |
| NFX1          | -1.213145111 | 5.024995236 | 7.14E-35 | 1.62E-33 | 68.8432371 |
| ZWINT         | -1.643365056 | 3.969474981 | 8.37E-35 | 1.90E-33 | 68.684179  |
| RINT1         | -2.323448737 | 3.652551214 | 8.58E-35 | 1.94E-33 | 68.6593566 |
| HCG18         | -1.00301433  | 5.33553579  | 8.66E-35 | 1.95E-33 | 68.6504797 |
| DDX59         | -1.037806351 | 5.174367851 | 9.27E-35 | 2.07E-33 | 68.5820062 |
| RAD17         | -1.387238605 | 5.279132424 | 9.61E-35 | 2.14E-33 | 68.5457118 |
| PEX19         | -1.045394427 | 5.826675262 | 9.87E-35 | 2.20E-33 | 68.5191297 |
| LINC00909     | -2.360662864 | 4.83750149  | 9.98E-35 | 2.22E-33 | 68.5083753 |
| PPRC1         | -1.550574076 | 5.25243495  | 1.02E-34 | 2.26E-33 | 68.4882454 |
| AAR2          | -1.163009695 | 6.513341768 | 1.03E-34 | 2.29E-33 | 68.4741364 |
| PHF23         | -1.241614444 | 6.898592249 | 1.04E-34 | 2.30E-33 | 68.4692457 |
| TRIT1         | -1.570871037 | 5.01424511  | 1.20E-34 | 2.65E-33 | 68.3227461 |
| ATP6V1G2      | -1.178145138 | 4.225237677 | 1.21E-34 | 2.66E-33 | 68.3191979 |
| BCL7B         | -1.074825959 | 6.034476204 | 1.21E-34 | 2.68E-33 | 68.3118276 |
| ICOS          | -1.407111183 | 4.191205427 | 1.24E-34 | 2.73E-33 | 68.2904372 |
| AIFM1         | -1.337837929 | 5.73928099  | 1.34E-34 | 2.94E-33 | 68.2146485 |
| MIRLET7D      | -1.603564685 | 4.81787672  | 1.35E-34 | 2.96E-33 | 68.2080469 |
| COPB2         | -1.118827844 | 5.011458266 | 1.37E-34 | 3.01E-33 | 68.1912106 |
| HCFC2         | -1.287294817 | 3.522260777 | 1.38E-34 | 3.02E-33 | 68.1862405 |
| ADD1          | -1.058036714 | 7.072337636 | 1.43E-34 | 3.12E-33 | 68.1495221 |
| PAFAH2        | -1.22344046  | 5.197467102 | 1.46E-34 | 3.18E-33 | 68.129455  |
| CERS6         | -1.126668817 | 4.07339195  | 1.56E-34 | 3.40E-33 | 68.0596068 |
| SPINK5        | -1.171420555 | 3.571120692 | 1.61E-34 | 3.50E-33 | 68.0318103 |
| FNBP4         | -1.443724446 | 5.606138838 | 1.66E-34 | 3.60E-33 | 68.0002791 |
| RP4-773N10.4  | -1.625430144 | 4.468898408 | 1.68E-34 | 3.65E-33 | 67.9857744 |
| AKIRIN2       | -1.566394414 | 5.934018002 | 1.73E-34 | 3.75E-33 | 67.9562095 |
| CD28          | -1.448996055 | 4.297997697 | 1.79E-34 | 3.88E-33 | 67.9214426 |
| IL21R         | -1.200700275 | 5.416619939 | 1.83E-34 | 3.96E-33 | 67.9000799 |
| RP11-315F22.1 | 1.03635424   | 4.355736793 | 1.83E-34 | 3.96E-33 | 67.8987523 |
| LCMT2         | -1.251875974 | 4.439582943 | 1.84E-34 | 3.98E-33 | 67.8932771 |
| RP11-285J16.1 | -1.306971558 | 5.149443367 | 1.90E-34 | 4.09E-33 | 67.8638526 |
| FAM86A        | -1.355093066 | 5.026364344 | 1.90E-34 | 4.09E-33 | 67.8624432 |
| SNRK-AS1      | -1.010197795 | 3.899117031 | 1.91E-34 | 4.11E-33 | 67.85873   |
| SSR3          | -1.279698234 | 4.547161371 | 1.92E-34 | 4.13E-33 | 67.8509324 |
| G3BP1         | -1.115459006 | 5.47488742  | 1.95E-34 | 4.19E-33 | 67.835858  |
| CLIP4         | -1.739463075 | 4.079601383 | 2.20E-34 | 4.68E-33 | 67.7150996 |
| UBA5          | -1.312111582 | 3.986993207 | 2.22E-34 | 4.71E-33 | 67.7079758 |
| ZSWIM5        | -1.033612637 | 3.604627002 | 2.30E-34 | 4.87E-33 | 67.6717981 |
| GOSR1         | -1.111928319 | 5.123836598 | 2.32E-34 | 4.90E-33 | 67.663682  |
| PRKG2         | -1.131048745 | 3.891779006 | 2.34E-34 | 4.95E-33 | 67.6532068 |
| PSME3         | -1.218513658 | 6.39534866  | 2.50E-34 | 5.27E-33 | 67.5871793 |
| C11orf21      | -1.225797194 | 6.249988553 | 2.63E-34 | 5.52E-33 | 67.5383674 |

|               |              |             |          |          |            |
|---------------|--------------|-------------|----------|----------|------------|
| CACNG7        | -1.018547439 | 3.959964754 | 2.69E-34 | 5.63E-33 | 67.5147666 |
| PURA          | -1.421126276 | 4.898223982 | 2.72E-34 | 5.68E-33 | 67.5032229 |
| AK055981      | -1.410727075 | 4.777020921 | 2.76E-34 | 5.76E-33 | 67.4893453 |
| BHLHE40       | -1.566511067 | 5.566967665 | 2.81E-34 | 5.85E-33 | 67.4715299 |
| LILRA1        | -1.380196957 | 6.506080465 | 2.81E-34 | 5.85E-33 | 67.471422  |
| TPM4          | -1.044542489 | 5.394433251 | 2.86E-34 | 5.93E-33 | 67.4545289 |
| ACPP          | -1.021827246 | 4.09906814  | 3.11E-34 | 6.43E-33 | 67.3705818 |
| RP1-39G22.7   | -1.062736174 | 4.266283581 | 3.24E-34 | 6.68E-33 | 67.3299911 |
| DGKQ          | -1.311042099 | 5.869371226 | 3.29E-34 | 6.78E-33 | 67.3140647 |
| GPC3          | -1.01375063  | 3.704340576 | 3.48E-34 | 7.16E-33 | 67.2562732 |
| TMEM19        | -1.310996079 | 4.680102903 | 3.61E-34 | 7.42E-33 | 67.2197549 |
| PHF2          | -1.216179324 | 4.815119067 | 3.64E-34 | 7.46E-33 | 67.2126567 |
| ZNF439        | -1.577842809 | 3.065057344 | 3.82E-34 | 7.82E-33 | 67.164483  |
| FIRRE         | -1.167983414 | 4.352701926 | 3.89E-34 | 7.97E-33 | 67.1451824 |
| CEP76         | -1.175846086 | 3.034184171 | 3.97E-34 | 8.12E-33 | 67.1256486 |
| ZNF304        | -1.723377319 | 3.075497061 | 4.00E-34 | 8.17E-33 | 67.1184316 |
| MEF2A         | -1.934167507 | 4.696206766 | 4.14E-34 | 8.42E-33 | 67.0844898 |
| POLE          | -1.084315178 | 5.602639192 | 4.14E-34 | 8.43E-33 | 67.0822793 |
| SLC44A1       | -1.071305935 | 4.404906269 | 4.51E-34 | 9.17E-33 | 66.9966732 |
| REPS1         | -1.288891599 | 4.876493994 | 4.65E-34 | 9.43E-33 | 66.9679359 |
| APH1A         | -1.057529583 | 5.407302142 | 5.02E-34 | 1.02E-32 | 66.8900029 |
| PIK3IP1       | -1.56567622  | 7.136529754 | 5.04E-34 | 1.02E-32 | 66.8858746 |
| CANT1         | -1.240974011 | 7.319198691 | 5.16E-34 | 1.04E-32 | 66.8627494 |
| ARHGDI1       | -1.131609741 | 6.222095244 | 5.19E-34 | 1.05E-32 | 66.8565686 |
| TBC1D19       | -1.057948479 | 3.990140157 | 5.24E-34 | 1.05E-32 | 66.8482026 |
| MORC4         | -1.346294389 | 3.673333505 | 5.24E-34 | 1.05E-32 | 66.8472749 |
| RMND1         | -1.137817864 | 4.414190474 | 5.38E-34 | 1.08E-32 | 66.821013  |
| OS9           | -1.295437372 | 8.469558326 | 5.40E-34 | 1.08E-32 | 66.8178823 |
| TAAR8         | -1.042694239 | 3.871761334 | 5.96E-34 | 1.19E-32 | 66.7190189 |
| ZMYM5         | -1.062515587 | 3.540028721 | 6.88E-34 | 1.37E-32 | 66.5750389 |
| GPALPP1       | -1.703208263 | 4.387193097 | 7.16E-34 | 1.42E-32 | 66.5347425 |
| C6orf136      | -1.446162917 | 5.747715968 | 7.35E-34 | 1.46E-32 | 66.5087461 |
| FUBP3         | -2.147032993 | 5.15618527  | 7.77E-34 | 1.53E-32 | 66.4529866 |
| MYO9A         | -1.142096037 | 4.92339607  | 7.83E-34 | 1.55E-32 | 66.4443473 |
| BUB1B         | -1.05208508  | 2.996136344 | 8.13E-34 | 1.60E-32 | 66.4074415 |
| CKAP5         | -1.094298092 | 5.924186861 | 8.46E-34 | 1.67E-32 | 66.3673292 |
| CIPC          | -1.725610094 | 3.558574256 | 8.69E-34 | 1.71E-32 | 66.3408384 |
| KLF11         | -1.163370071 | 4.431091252 | 8.90E-34 | 1.74E-32 | 66.3168361 |
| SMC2          | -1.117722485 | 3.041564262 | 9.01E-34 | 1.76E-32 | 66.3042449 |
| SAAL1         | -1.200531111 | 5.057395018 | 9.28E-34 | 1.80E-32 | 66.2743322 |
| CD226         | -1.406391274 | 3.702036576 | 9.33E-34 | 1.81E-32 | 66.269034  |
| RP11-127B20.2 | -1.936558554 | 3.697948209 | 9.46E-34 | 1.83E-32 | 66.2550298 |
| ZNF567        | -1.108533854 | 3.695055339 | 9.48E-34 | 1.84E-32 | 66.2531274 |
| ZNF529        | -1.407340853 | 4.222154524 | 9.57E-34 | 1.85E-32 | 66.2438585 |
| ZNHIT6        | -1.759647161 | 3.693961908 | 9.73E-34 | 1.88E-32 | 66.2274938 |
| TUBGCP3       | -1.563279676 | 4.410803206 | 9.92E-34 | 1.91E-32 | 66.2084358 |
| C3orf17       | -1.43902456  | 5.221861518 | 1.03E-33 | 1.98E-32 | 66.1712478 |
| RFC1          | -1.630721329 | 5.183983369 | 1.03E-33 | 1.98E-32 | 66.1697678 |
| STYX          | -1.848942944 | 4.295618426 | 1.07E-33 | 2.06E-32 | 66.1297667 |
| CCT5          | -1.281329853 | 6.036567583 | 1.09E-33 | 2.09E-32 | 66.1108095 |
| CKMT2-AS1     | -1.392758882 | 4.277398176 | 1.23E-33 | 2.35E-32 | 65.9906352 |
| AK2           | -1.071941772 | 5.966601358 | 1.25E-33 | 2.37E-32 | 65.980273  |
| ARPC4         | -1.036250237 | 7.774826367 | 1.26E-33 | 2.41E-32 | 65.9653573 |
| METTL13       | -1.080745361 | 5.98411069  | 1.28E-33 | 2.44E-32 | 65.9493355 |
| PMS2P3        | -1.084894492 | 5.526592895 | 1.35E-33 | 2.56E-32 | 65.901583  |
| LEF1-AS1      | -1.448998356 | 3.705997478 | 1.35E-33 | 2.57E-32 | 65.8967704 |
| ABCB4         | -1.120261176 | 3.511446997 | 1.46E-33 | 2.77E-32 | 65.8210324 |
| IRF2          | -2.212624336 | 7.496206923 | 1.50E-33 | 2.83E-32 | 65.7969057 |

|               |              |             |          |          |            |
|---------------|--------------|-------------|----------|----------|------------|
| TRIM68        | -1.568226367 | 5.422406467 | 1.62E-33 | 3.06E-32 | 65.7151525 |
| SLC17A5       | -1.326753683 | 5.889846596 | 1.77E-33 | 3.32E-32 | 65.6287113 |
| CTD-2035E11.5 | -1.356805174 | 3.258691349 | 1.79E-33 | 3.35E-32 | 65.6172941 |
| ZC3H13        | -1.248861926 | 5.52579815  | 1.79E-33 | 3.36E-32 | 65.6149968 |
| FLJ45513      | -1.338753927 | 5.204839665 | 1.86E-33 | 3.47E-32 | 65.5799261 |
| KDELR1        | -1.125509041 | 6.90905325  | 1.88E-33 | 3.50E-32 | 65.5695229 |
| SUMF2         | -1.336949744 | 6.197268997 | 1.95E-33 | 3.62E-32 | 65.5306459 |
| FAM159A       | -1.144496388 | 5.229119005 | 1.97E-33 | 3.65E-32 | 65.5210847 |
| ERMN          | -1.603847742 | 3.318939684 | 1.98E-33 | 3.67E-32 | 65.5154115 |
| GTPBP4        | -1.340220363 | 5.204820216 | 2.00E-33 | 3.70E-32 | 65.5062641 |
| RCHY1         | -1.632382848 | 3.668585807 | 2.01E-33 | 3.72E-32 | 65.4991652 |
| TNFRSF10B     | -1.06246541  | 5.552091944 | 2.05E-33 | 3.79E-32 | 65.4785849 |
| TMEM161B      | -1.234022283 | 4.539132948 | 2.06E-33 | 3.80E-32 | 65.4753796 |
| STRN3         | -1.529565759 | 3.789017469 | 2.09E-33 | 3.85E-32 | 65.4604506 |
| NPC1          | -1.09109028  | 4.478989465 | 2.10E-33 | 3.86E-32 | 65.4565694 |
| ZNF763        | -2.049267987 | 4.154623903 | 2.16E-33 | 3.98E-32 | 65.4266376 |
| ATP2C1        | -1.146635282 | 4.46568307  | 2.28E-33 | 4.17E-32 | 65.376081  |
| KCTD6         | -1.387495713 | 4.28477198  | 2.30E-33 | 4.20E-32 | 65.3677489 |
| NCSTN         | -1.234693809 | 5.624303278 | 2.34E-33 | 4.28E-32 | 65.3465341 |
| DQ570835      | -2.095833474 | 3.925039825 | 2.37E-33 | 4.32E-32 | 65.3368493 |
| CUL2          | -1.332382024 | 4.049954274 | 2.44E-33 | 4.45E-32 | 65.3057926 |
| DDX19A        | -1.095993348 | 4.789468621 | 2.45E-33 | 4.47E-32 | 65.3004792 |
| MED15         | -1.170084275 | 7.461758036 | 2.73E-33 | 4.96E-32 | 65.1938974 |
| NDUFAF4       | -1.171886105 | 4.402546267 | 2.88E-33 | 5.22E-32 | 65.1389683 |
| KLHL12        | -1.658117055 | 5.263780474 | 2.92E-33 | 5.27E-32 | 65.1275669 |
| CD44          | -1.132597358 | 6.335833919 | 3.32E-33 | 5.98E-32 | 64.9992501 |
| CALCOCO1      | -1.073504407 | 7.774171534 | 3.32E-33 | 5.99E-32 | 64.9969071 |
| CERS2         | -1.481941069 | 8.214535192 | 3.51E-33 | 6.31E-32 | 64.9417977 |
| FAM193B       | -1.05237363  | 5.894955349 | 3.53E-33 | 6.33E-32 | 64.9377557 |
| POLK          | -1.947516562 | 4.625128971 | 3.56E-33 | 6.38E-32 | 64.9286492 |
| ADNP2         | -1.089020222 | 6.255442151 | 3.58E-33 | 6.40E-32 | 64.923517  |
| BRCC3         | -1.456582869 | 3.926186564 | 3.62E-33 | 6.48E-32 | 64.9117179 |
| ABHD15        | -1.238251858 | 4.524961129 | 3.65E-33 | 6.53E-32 | 64.9030256 |
| EPB41L4A-AS1  | -1.35286741  | 5.084340303 | 3.81E-33 | 6.80E-32 | 64.8589865 |
| GLIDR         | -1.004659018 | 5.555481128 | 3.92E-33 | 6.99E-32 | 64.830759  |
| MFSD8         | -1.671321569 | 3.893024516 | 4.00E-33 | 7.12E-32 | 64.8107316 |
| DDHD1         | -1.283237248 | 4.382134391 | 4.09E-33 | 7.26E-32 | 64.7883921 |
| LOC389199     | 1.13885588   | 6.433670398 | 4.21E-33 | 7.47E-32 | 64.7590641 |
| ZNF2          | -1.095163674 | 4.414848619 | 4.24E-33 | 7.50E-32 | 64.7536147 |
| MESDC1        | -1.238510114 | 6.441209603 | 4.24E-33 | 7.50E-32 | 64.7531555 |
| MTFMT         | -1.332264448 | 3.702139417 | 4.25E-33 | 7.51E-32 | 64.7502883 |
| METTL14       | -1.336120913 | 4.589235619 | 4.75E-33 | 8.36E-32 | 64.6386827 |
| CCDC88C       | -1.567079656 | 6.003000928 | 4.80E-33 | 8.43E-32 | 64.6289997 |
| PNRC1         | -2.005321484 | 8.74551689  | 4.86E-33 | 8.54E-32 | 64.6152491 |
| LOC100505920  | -1.126558595 | 3.501428721 | 5.04E-33 | 8.85E-32 | 64.5788002 |
| BAG5          | -1.284191613 | 5.244061121 | 5.13E-33 | 8.98E-32 | 64.5626694 |
| GIMAP8        | -1.433544092 | 5.592058375 | 5.14E-33 | 8.99E-32 | 64.5604403 |
| GPATCH2L      | -1.169591036 | 4.97255507  | 5.14E-33 | 8.99E-32 | 64.5596169 |
| PPP2R1A       | -1.008093677 | 6.977077241 | 5.22E-33 | 9.12E-32 | 64.543735  |
| C22orf39      | -1.467504306 | 4.927165676 | 5.35E-33 | 9.33E-32 | 64.5206041 |
| C1orf131      | -2.282631436 | 5.065346549 | 5.51E-33 | 9.61E-32 | 64.4900501 |
| C2orf54       | -1.139761827 | 4.911824571 | 5.59E-33 | 9.74E-32 | 64.4762427 |
| SCIMP         | -1.132614886 | 3.817367621 | 5.64E-33 | 9.82E-32 | 64.4668718 |
| C9orf69       | -1.389852594 | 6.82618186  | 5.75E-33 | 9.99E-32 | 64.4484818 |
| CCDC117       | -1.517198695 | 4.802343456 | 5.86E-33 | 1.02E-31 | 64.4294552 |
| THOC2         | -1.514692585 | 5.071172029 | 5.86E-33 | 1.02E-31 | 64.4288414 |
| SMC6          | -1.27830568  | 3.720888163 | 5.88E-33 | 1.02E-31 | 64.4250544 |
| DFFB          | -1.593520915 | 3.700609416 | 5.91E-33 | 1.02E-31 | 64.4209711 |

|                |              |             |          |          |            |
|----------------|--------------|-------------|----------|----------|------------|
| LHX5           | 1.199939033  | 5.295665003 | 6.07E-33 | 1.05E-31 | 64.3929662 |
| RP3-327A19.5   | -1.34518322  | 3.689594737 | 6.08E-33 | 1.05E-31 | 64.391671  |
| TRNT1          | -1.718882348 | 3.916884081 | 6.18E-33 | 1.06E-31 | 64.375153  |
| PHF6           | -1.395788427 | 3.72824376  | 6.22E-33 | 1.07E-31 | 64.3693779 |
| DGKZ           | -1.400347027 | 6.834532866 | 6.36E-33 | 1.09E-31 | 64.34679   |
| HTR1D          | -1.113088202 | 3.512570467 | 6.65E-33 | 1.14E-31 | 64.3026329 |
| RP11-199F11.2  | -1.59339793  | 4.488166941 | 6.66E-33 | 1.14E-31 | 64.3007858 |
| MCOLN2         | -1.269732094 | 4.895942653 | 6.69E-33 | 1.15E-31 | 64.296352  |
| SGPP1          | -2.950245478 | 3.665807503 | 6.69E-33 | 1.15E-31 | 64.2953552 |
| TSPAN14        | -1.135335558 | 7.481455143 | 6.84E-33 | 1.17E-31 | 64.2735169 |
| DDX50          | -1.123133739 | 5.569484088 | 6.92E-33 | 1.18E-31 | 64.2624469 |
| GUF1           | -1.177195246 | 3.499767089 | 6.99E-33 | 1.19E-31 | 64.252636  |
| HNRNPU         | -1.085296198 | 5.75445759  | 7.01E-33 | 1.20E-31 | 64.2493145 |
| IMPACT         | -1.344135974 | 2.87482128  | 7.12E-33 | 1.21E-31 | 64.233609  |
| OGFOD1         | -1.095229451 | 5.463576353 | 7.32E-33 | 1.25E-31 | 64.2053986 |
| DBR1           | -1.965042206 | 3.957747439 | 7.39E-33 | 1.26E-31 | 64.1968719 |
| PJA1           | -1.423907553 | 6.863588009 | 7.78E-33 | 1.32E-31 | 64.1442464 |
| SOWAHC         | -1.151636101 | 3.823739012 | 7.86E-33 | 1.33E-31 | 64.1350546 |
| RBM4B          | -1.394643943 | 6.046534874 | 8.06E-33 | 1.36E-31 | 64.1094713 |
| LOC101927420   | -1.005202426 | 4.591638695 | 8.20E-33 | 1.39E-31 | 64.0921719 |
| TSPYL5         | -1.008173595 | 3.600786016 | 8.31E-33 | 1.40E-31 | 64.079311  |
| ALDH1A1        | -2.081713112 | 4.424307084 | 8.35E-33 | 1.41E-31 | 64.0745474 |
| UBXN8          | -1.246482357 | 3.351609635 | 8.40E-33 | 1.42E-31 | 64.0681013 |
| ZC3HC1         | -1.066471511 | 5.93390253  | 8.56E-33 | 1.44E-31 | 64.0492922 |
| TMCO6          | -1.44499413  | 5.724507308 | 8.70E-33 | 1.46E-31 | 64.0326293 |
| THAP11         | -1.410029157 | 5.549190285 | 8.96E-33 | 1.50E-31 | 64.0029298 |
| B3GNT2         | -1.554506803 | 3.711877017 | 8.96E-33 | 1.50E-31 | 64.0028301 |
| TUBD1          | -1.145284463 | 4.522732046 | 8.97E-33 | 1.50E-31 | 64.0025287 |
| EDEM2          | -1.147407235 | 6.068487474 | 8.97E-33 | 1.50E-31 | 64.002182  |
| ITGA6          | -1.966311972 | 4.807491378 | 8.98E-33 | 1.50E-31 | 64.0013645 |
| SNHG4          | -1.038170374 | 2.911706644 | 9.02E-33 | 1.51E-31 | 63.9970899 |
| CCDC58         | -1.446090902 | 3.727692846 | 9.02E-33 | 1.51E-31 | 63.9960887 |
| CD300LB        | -1.061479681 | 6.577662351 | 9.32E-33 | 1.56E-31 | 63.9637355 |
| LINC01165      | 1.000234504  | 3.89210556  | 9.53E-33 | 1.59E-31 | 63.9415384 |
| ZBTB18         | -1.996619607 | 5.580915283 | 9.74E-33 | 1.62E-31 | 63.919881  |
| VCPIP1         | -1.136598841 | 4.356616021 | 9.85E-33 | 1.64E-31 | 63.9082674 |
| HDAC2          | -1.416725938 | 4.702848529 | 1.06E-32 | 1.76E-31 | 63.8345489 |
| RIOK2          | -1.345223877 | 3.595539105 | 1.08E-32 | 1.79E-31 | 63.8164679 |
| IREB2          | -1.582379005 | 4.413808379 | 1.10E-32 | 1.82E-31 | 63.8012062 |
| GXYLT1         | -1.322959874 | 3.711002366 | 1.10E-32 | 1.82E-31 | 63.796514  |
| CD81           | -2.055276844 | 8.114371887 | 1.10E-32 | 1.82E-31 | 63.7953206 |
| S1PR5          | -1.228372045 | 5.538466266 | 1.10E-32 | 1.82E-31 | 63.7946467 |
| ZXDC           | -1.220808514 | 5.458642095 | 1.13E-32 | 1.86E-31 | 63.775219  |
| RP11-1024P17.1 | -1.140141352 | 3.166503317 | 1.17E-32 | 1.93E-31 | 63.7324353 |
| AKAP1          | -1.108946802 | 5.213099751 | 1.23E-32 | 2.02E-31 | 63.6852538 |
| LOC157562      | -1.193514847 | 5.160587805 | 1.26E-32 | 2.06E-31 | 63.6652912 |
| SUPT16H        | -1.368193085 | 6.579071582 | 1.33E-32 | 2.19E-31 | 63.6044965 |
| FCRL3          | -1.827408183 | 5.70562596  | 1.34E-32 | 2.19E-31 | 63.5993445 |
| HCCAT5         | -1.119984905 | 4.357182231 | 1.44E-32 | 2.36E-31 | 63.5261482 |
| USP37          | -1.101382355 | 4.011348882 | 1.45E-32 | 2.38E-31 | 63.518853  |
| TRPM6          | -1.243654164 | 4.713654436 | 1.45E-32 | 2.38E-31 | 63.5179238 |
| CMAS           | -1.009249137 | 5.037556349 | 1.46E-32 | 2.38E-31 | 63.5155524 |
| DAPK1          | -1.013944675 | 4.481946159 | 1.49E-32 | 2.43E-31 | 63.4925089 |
| DAPK1          | -1.427702899 | 4.968254549 | 1.50E-32 | 2.43E-31 | 63.4895566 |
| TCERG1         | -1.805526563 | 3.939542391 | 1.50E-32 | 2.44E-31 | 63.4862793 |
| ZNF100         | -1.150921663 | 3.17604759  | 1.54E-32 | 2.50E-31 | 63.4619014 |
| TOX            | -1.358758342 | 3.274093789 | 1.55E-32 | 2.51E-31 | 63.4570984 |
| ITPR2          | -1.235710879 | 4.527452345 | 1.72E-32 | 2.79E-31 | 63.3489362 |

5-Mar

|              |              |             |          |          |            |
|--------------|--------------|-------------|----------|----------|------------|
| METTL3       | -1.301921117 | 6.10315396  | 1.73E-32 | 2.79E-31 | 63.3459735 |
| LINC00202-1  | 1.332173516  | 5.696526247 | 1.77E-32 | 2.85E-31 | 63.3237844 |
| LOC100289230 | -1.485552172 | 4.725406182 | 1.90E-32 | 3.06E-31 | 63.2486943 |
| LOC644794    | -1.014650074 | 4.562393802 | 1.96E-32 | 3.16E-31 | 63.218099  |
| ACLY         | -1.035441702 | 6.290991735 | 2.08E-32 | 3.35E-31 | 63.1573427 |
| ZNF516       | -1.905035962 | 5.473641016 | 2.20E-32 | 3.53E-31 | 63.1043208 |
| UBE2E2       | -1.65855039  | 5.145598246 | 2.34E-32 | 3.74E-31 | 63.0421253 |
| ALKBH2       | -1.138771407 | 4.319639157 | 2.46E-32 | 3.93E-31 | 62.9920826 |
| RRP36        | -1.032412087 | 5.250569213 | 2.53E-32 | 4.04E-31 | 62.9630416 |
| MIF4GD       | -1.164490625 | 6.741331346 | 2.55E-32 | 4.07E-31 | 62.9564188 |
| SUV39H1      | -1.0632824   | 5.373410606 | 2.60E-32 | 4.15E-31 | 62.934348  |
| FKTN         | -1.665458801 | 4.306479398 | 2.61E-32 | 4.15E-31 | 62.9325559 |
| APPBP2       | -1.465761653 | 4.364909189 | 2.63E-32 | 4.19E-31 | 62.9242886 |
| ZNF645       | -1.082834859 | 3.702630275 | 2.67E-32 | 4.25E-31 | 62.9085009 |
| ADK          | -1.19718034  | 4.53282439  | 2.68E-32 | 4.25E-31 | 62.9074922 |
| INTS6-AS1    | -1.089509829 | 3.869453537 | 2.69E-32 | 4.27E-31 | 62.9028684 |
| OSBPL3       | -1.743477476 | 4.504362013 | 2.84E-32 | 4.50E-31 | 62.8482496 |
| ANKRD10      | -1.190169713 | 4.404658813 | 2.89E-32 | 4.57E-31 | 62.8311436 |
| ZEB1-AS1     | -1.344807626 | 3.110858381 | 2.94E-32 | 4.64E-31 | 62.8144821 |
| ZNF639       | -1.562705527 | 3.691629692 | 2.96E-32 | 4.68E-31 | 62.8047072 |
| TRAPPC11     | -1.612848973 | 3.995656814 | 3.01E-32 | 4.75E-31 | 62.7885994 |
| UPF1         | -1.206637542 | 6.266507297 | 3.18E-32 | 5.00E-31 | 62.7354909 |
| C2orf49      | -1.398401717 | 4.160012971 | 3.25E-32 | 5.10E-31 | 62.7119554 |
| VPS37A       | -1.87511278  | 4.17168315  | 3.52E-32 | 5.51E-31 | 62.6328856 |
| AF090939     | -1.313949725 | 4.57513702  | 3.61E-32 | 5.63E-31 | 62.6069548 |
| JDP2         | -1.01782455  | 5.041233053 | 3.72E-32 | 5.79E-31 | 62.5782592 |
| ANGEL2       | -1.661536837 | 4.187635283 | 3.79E-32 | 5.90E-31 | 62.5583089 |
| C5orf24      | -1.071272866 | 4.163785757 | 3.97E-32 | 6.16E-31 | 62.5127036 |
| API5         | -1.352653857 | 4.607887815 | 4.47E-32 | 6.92E-31 | 62.3934784 |
| HPS3         | -1.091339986 | 4.500967648 | 4.56E-32 | 7.06E-31 | 62.3721403 |
| TRIM59       | -1.632073695 | 3.135630625 | 4.65E-32 | 7.18E-31 | 62.3541873 |
| PARN         | -1.306430041 | 6.559136365 | 4.78E-32 | 7.36E-31 | 62.3261209 |
| SUPT7L       | -1.160176183 | 4.778205683 | 4.80E-32 | 7.38E-31 | 62.3223028 |
| ZXDA         | -1.083761362 | 3.521408943 | 4.97E-32 | 7.64E-31 | 62.2869699 |
| TNIK         | -1.022821934 | 5.07155739  | 5.11E-32 | 7.85E-31 | 62.2596243 |
| MSH2         | -1.795433635 | 3.730549582 | 5.17E-32 | 7.94E-31 | 62.2473631 |
| R3HDM2       | -1.133054646 | 6.883637918 | 5.28E-32 | 8.09E-31 | 62.2267085 |
| PEX3         | -1.27016937  | 4.176819146 | 5.35E-32 | 8.18E-31 | 62.2130719 |
| AKAP17A      | -1.237076566 | 6.110364755 | 5.35E-32 | 8.18E-31 | 62.2130699 |
| METTL25      | -1.439804431 | 5.420099782 | 5.44E-32 | 8.31E-31 | 62.1965839 |
| RP11-33O4.1  | -1.145494652 | 4.915958752 | 5.46E-32 | 8.33E-31 | 62.1935801 |
| FNIP2        | -1.559543099 | 5.227508894 | 5.51E-32 | 8.40E-31 | 62.1841867 |
| PROSER3      | -1.133027589 | 4.966301074 | 5.91E-32 | 9.00E-31 | 62.113059  |
| LPIN1        | -1.291369914 | 5.640843587 | 6.32E-32 | 9.59E-31 | 62.0455871 |
| MTMR1        | -1.431475598 | 5.652348321 | 6.34E-32 | 9.61E-31 | 62.0422545 |
| FAM46A       | -1.154593132 | 5.26387744  | 6.46E-32 | 9.77E-31 | 62.0238999 |
| TCEAL8       | -2.125780802 | 4.167005391 | 6.60E-32 | 9.95E-31 | 62.0031413 |
| MAPKAPK5     | -1.313187895 | 4.070939715 | 6.84E-32 | 1.03E-30 | 61.9667105 |
| RP11-4M23.7  | 1.280707661  | 4.852415756 | 6.96E-32 | 1.04E-30 | 61.9502413 |
| C1orf109     | -1.929098333 | 3.1376422   | 7.08E-32 | 1.06E-30 | 61.9324081 |
| NUP85        | -1.486262355 | 5.856158342 | 7.12E-32 | 1.07E-30 | 61.92671   |
| PALB2        | -1.548368854 | 4.652708116 | 7.27E-32 | 1.09E-30 | 61.905833  |
| KIZ          | -1.328478204 | 5.147312444 | 7.29E-32 | 1.09E-30 | 61.9036923 |
| TMEM39B      | -1.161454212 | 5.470903625 | 7.30E-32 | 1.09E-30 | 61.9016218 |
| SLC30A5      | -1.507400798 | 4.157533805 | 7.36E-32 | 1.10E-30 | 61.8932272 |
| PLEKHG1      | -1.002848446 | 3.074453903 | 7.59E-32 | 1.13E-30 | 61.8628293 |
| KLHL42       | -1.157477042 | 4.652944441 | 7.62E-32 | 1.13E-30 | 61.8587832 |
| SPRY4        | -1.093633431 | 5.156624795 | 7.80E-32 | 1.16E-30 | 61.8353052 |



|            |              |             |          |          |            |
|------------|--------------|-------------|----------|----------|------------|
| TMEM87A    | -1.207088151 | 5.026915809 | 8.24E-32 | 1.22E-30 | 61.7802897 |
| LDOC1      | -1.340866068 | 5.014367379 | 8.51E-32 | 1.25E-30 | 61.7484497 |
| S1PR1      | -2.202375701 | 5.4746144   | 8.60E-32 | 1.27E-30 | 61.7378251 |
| ATP6       | -1.128527785 | 8.483743447 | 8.65E-32 | 1.27E-30 | 61.7316863 |
| SIN3B      | -1.042410812 | 5.97046024  | 8.79E-32 | 1.29E-30 | 61.715426  |
| PANK4      | -1.173301307 | 6.306783983 | 8.82E-32 | 1.30E-30 | 61.7128206 |
| LOC286367  | -1.024379098 | 3.474872639 | 8.96E-32 | 1.32E-30 | 61.6966674 |
| SMARCC1    | -1.2061216   | 6.012403514 | 9.36E-32 | 1.37E-30 | 61.6525924 |
| ATF2       | -1.503280678 | 3.407996766 | 9.86E-32 | 1.44E-30 | 61.6009016 |
| BACH1      | -1.381197079 | 5.211775596 | 9.95E-32 | 1.45E-30 | 61.591644  |
| G2E3       | -1.633602751 | 4.091230219 | 1.01E-31 | 1.47E-30 | 61.5794816 |
| TFIP11     | -1.00745478  | 5.662453113 | 1.02E-31 | 1.49E-30 | 61.5668499 |
| ATAD2B     | -1.448298821 | 3.882835637 | 1.02E-31 | 1.49E-30 | 61.5655756 |
| CAND1      | -1.389614352 | 4.553851032 | 1.06E-31 | 1.54E-30 | 61.530437  |
| RFX5       | -1.032838752 | 6.826701956 | 1.13E-31 | 1.65E-30 | 61.4604507 |
| EXOC2      | -1.458390028 | 4.889228996 | 1.14E-31 | 1.65E-30 | 61.4568946 |
| SNX20      | -1.204627708 | 5.890788041 | 1.21E-31 | 1.76E-30 | 61.3923811 |
| MIR3682    | -1.334443096 | 3.05002542  | 1.24E-31 | 1.80E-30 | 61.3696506 |
| TC2N       | -1.658924575 | 3.509008415 | 1.26E-31 | 1.82E-30 | 61.3581261 |
| GLCCI1     | -1.507511366 | 4.658446259 | 1.26E-31 | 1.83E-30 | 61.3526232 |
| SRPRB      | -1.025992406 | 5.538960349 | 1.29E-31 | 1.87E-30 | 61.3285472 |
| CCNT2      | -1.86892788  | 3.555929163 | 1.29E-31 | 1.87E-30 | 61.327806  |
| AKNA       | -1.258290629 | 6.038933559 | 1.30E-31 | 1.87E-30 | 61.3259841 |
| C7orf49    | -1.091799219 | 6.33624489  | 1.31E-31 | 1.89E-30 | 61.3164224 |
| C11orf80   | -1.284604819 | 4.562158546 | 1.47E-31 | 2.11E-30 | 61.2003922 |
| NDUFS4     | -1.173960712 | 4.664419388 | 1.58E-31 | 2.27E-30 | 61.1259238 |
| LARS2      | -1.061634212 | 4.746320995 | 1.62E-31 | 2.31E-30 | 61.1061413 |
| RASSF1     | -1.093978098 | 6.733909599 | 1.63E-31 | 2.32E-30 | 61.0992106 |
| C19orf12   | -1.354798507 | 5.818097577 | 1.65E-31 | 2.36E-30 | 61.0844661 |
| ZNF75A     | -1.072164069 | 5.701566061 | 1.68E-31 | 2.40E-30 | 61.065381  |
| MFAP3      | -1.089038297 | 4.650325934 | 1.71E-31 | 2.43E-30 | 61.0502883 |
| VPS26A     | -1.489391978 | 5.201579424 | 1.73E-31 | 2.46E-30 | 61.0397393 |
| MAPK9      | -1.259952421 | 4.900463299 | 1.79E-31 | 2.54E-30 | 61.0050781 |
| SRSF1      | -1.251268268 | 5.57440342  | 1.83E-31 | 2.60E-30 | 60.9810066 |
| URI1       | -1.209497785 | 4.26988465  | 1.88E-31 | 2.67E-30 | 60.9521748 |
| HLA-J      | -1.400859767 | 9.551544459 | 1.89E-31 | 2.68E-30 | 60.9467342 |
| RHNO1      | -1.246024439 | 4.000300118 | 1.90E-31 | 2.68E-30 | 60.944803  |
| SLC25A33   | -1.601074634 | 4.291451925 | 1.92E-31 | 2.71E-30 | 60.9338808 |
| DNMBP      | -1.069145433 | 5.263774226 | 1.92E-31 | 2.71E-30 | 60.9336294 |
| LOC285957  | -1.531297328 | 3.759682842 | 1.98E-31 | 2.80E-30 | 60.8997937 |
| IRX3       | -1.127722965 | 2.70735553  | 2.03E-31 | 2.86E-30 | 60.8788593 |
| PRKAA1     | -1.280941999 | 4.100589142 | 2.04E-31 | 2.88E-30 | 60.8700125 |
| NAA40      | -1.853133018 | 5.382509972 | 2.05E-31 | 2.88E-30 | 60.8689307 |
| RALGAPB    | -1.156043551 | 5.304321567 | 2.13E-31 | 2.99E-30 | 60.8296153 |
| RGS14      | -1.137883549 | 6.286046202 | 2.13E-31 | 2.99E-30 | 60.8286395 |
| PRPF40B    | -1.078825099 | 4.667670412 | 2.15E-31 | 3.02E-30 | 60.8180989 |
| XAGE2      | 1.203106476  | 5.751648904 | 2.18E-31 | 3.06E-30 | 60.8053596 |
| KANSL1L    | -1.006519373 | 3.827883964 | 2.19E-31 | 3.07E-30 | 60.7995743 |
| DDX55      | -1.08247883  | 3.961704008 | 2.28E-31 | 3.19E-30 | 60.7592386 |
| NSRP1      | -1.523642571 | 4.919490793 | 2.34E-31 | 3.27E-30 | 60.7361548 |
| SCAP       | -1.252039433 | 7.562637981 | 2.35E-31 | 3.28E-30 | 60.7293813 |
| ETAA1      | -1.169007094 | 2.888338978 | 2.38E-31 | 3.32E-30 | 60.7163313 |
| BC022047   | -1.422948499 | 5.911436423 | 2.39E-31 | 3.33E-30 | 60.714876  |
| AP000347.2 | -1.512715156 | 4.300735102 | 2.52E-31 | 3.50E-30 | 60.659152  |
| SYNRG      | -1.287993938 | 6.172438736 | 2.66E-31 | 3.68E-30 | 60.6058863 |
| PTPN18     | -1.425147822 | 6.158804326 | 2.87E-31 | 3.97E-30 | 60.5290285 |
| GCLM       | -1.40766914  | 4.342830309 | 2.92E-31 | 4.03E-30 | 60.5115176 |
| THTPA      | -1.201139118 | 6.552409856 | 2.98E-31 | 4.10E-30 | 60.4935619 |

|               |              |             |          |          |            |
|---------------|--------------|-------------|----------|----------|------------|
| SMYD4         | -1.141017989 | 5.841630665 | 2.98E-31 | 4.10E-30 | 60.4917441 |
| LOC93622      | -2.430996212 | 5.113669428 | 3.03E-31 | 4.16E-30 | 60.4764397 |
| RUSC1         | -1.274740608 | 6.193855765 | 3.06E-31 | 4.19E-30 | 60.467058  |
| FAM193A       | -1.583706621 | 6.317326861 | 3.11E-31 | 4.26E-30 | 60.450533  |
| BC079832      | -1.129658238 | 3.816930524 | 3.12E-31 | 4.27E-30 | 60.4467817 |
| MED23         | -1.362037963 | 4.835352005 | 3.14E-31 | 4.30E-30 | 60.4402799 |
| ZADH2         | -1.339116254 | 4.704889469 | 3.15E-31 | 4.31E-30 | 60.4358259 |
| CRYL1         | -1.036070801 | 5.879082193 | 3.20E-31 | 4.37E-30 | 60.419847  |
| MSL3          | -1.079705369 | 5.224380834 | 3.20E-31 | 4.37E-30 | 60.4197057 |
| RB1           | -1.959657051 | 4.202231227 | 3.28E-31 | 4.47E-30 | 60.3953081 |
| AC100830.4    | -1.099771713 | 4.238524527 | 3.36E-31 | 4.57E-30 | 60.37319   |
| HNRNPAB       | -1.464600123 | 7.311257158 | 3.38E-31 | 4.59E-30 | 60.3665375 |
| RP11-394I13.2 | -1.489880251 | 3.626239689 | 3.42E-31 | 4.64E-30 | 60.355125  |
| GFPT1         | -1.096665626 | 3.935560869 | 3.43E-31 | 4.65E-30 | 60.3513406 |
| PLEKHA3       | -1.144240461 | 4.488359354 | 3.49E-31 | 4.72E-30 | 60.335598  |
| VAMP4         | -1.346429312 | 4.065033754 | 3.49E-31 | 4.73E-30 | 60.3341518 |
| METTL4        | -1.552543247 | 4.249366769 | 3.61E-31 | 4.88E-30 | 60.3008265 |
| PSMG1         | -1.692086659 | 3.785990932 | 3.68E-31 | 4.98E-30 | 60.2800531 |
| CHTOP         | -1.091211381 | 6.866076425 | 3.69E-31 | 4.98E-30 | 60.2790359 |
| LOC283588     | -2.141141826 | 3.943306985 | 3.78E-31 | 5.10E-30 | 60.2548737 |
| EIF4E         | -1.088186853 | 4.087418887 | 3.80E-31 | 5.13E-30 | 60.2481198 |
| ZNF665        | -1.646471669 | 4.622004284 | 3.92E-31 | 5.28E-30 | 60.2180157 |
| PAXBP1        | -1.534355929 | 4.592584206 | 4.00E-31 | 5.38E-30 | 60.1983863 |
| SLAIN1        | -1.505801105 | 3.014102282 | 4.09E-31 | 5.49E-30 | 60.174894  |
| CTDSPL2       | -1.60980562  | 4.149504233 | 4.19E-31 | 5.62E-30 | 60.1520382 |
| TRIM5         | -1.369925051 | 4.259461398 | 4.46E-31 | 5.96E-30 | 60.089074  |
| TM2D1         | -1.560452772 | 4.756217771 | 4.48E-31 | 5.99E-30 | 60.0842287 |
| PARP11        | -1.08349258  | 4.129831436 | 4.63E-31 | 6.18E-30 | 60.0508493 |
| TNF           | -1.184772808 | 5.08549117  | 4.69E-31 | 6.26E-30 | 60.0373168 |
| C14orf93      | -1.154825485 | 4.14763276  | 4.72E-31 | 6.29E-30 | 60.0322188 |
| PRDX3         | -1.383318663 | 5.474635664 | 4.79E-31 | 6.37E-30 | 60.0177938 |
| LOC102723692  | -1.067636869 | 4.190320637 | 4.87E-31 | 6.48E-30 | 60.0007669 |
| PAPOLG        | -1.162453597 | 4.843663938 | 4.92E-31 | 6.54E-30 | 59.9895419 |
| TWSG1         | -1.136499199 | 3.192256561 | 4.93E-31 | 6.55E-30 | 59.9880811 |
| EPHA5-AS1     | 1.254488683  | 5.348778841 | 5.13E-31 | 6.82E-30 | 59.9476588 |
| TGDS          | -1.188477466 | 4.389723836 | 5.18E-31 | 6.87E-30 | 59.9386104 |
| FAM127A       | -1.096945183 | 7.932051107 | 5.40E-31 | 7.14E-30 | 59.8976853 |
| CIAPIN1       | -1.176737115 | 5.437722226 | 5.70E-31 | 7.54E-30 | 59.84205   |
| DUSP5         | -1.505339367 | 4.349905297 | 5.78E-31 | 7.63E-30 | 59.8284494 |
| C18orf21      | -1.050774589 | 4.269939206 | 5.80E-31 | 7.65E-30 | 59.8256784 |
| CLN5          | -1.487086942 | 4.400078906 | 5.96E-31 | 7.86E-30 | 59.797835  |
| TMEM184C      | -1.129456385 | 6.491401013 | 5.98E-31 | 7.88E-30 | 59.7938873 |
| BCORP1        | -1.003346469 | 3.057936336 | 6.02E-31 | 7.93E-30 | 59.7873619 |
| ACVR2A        | -1.081892733 | 4.163168763 | 6.27E-31 | 8.24E-30 | 59.7477217 |
| GATAD2B       | -1.325209559 | 6.798326528 | 6.31E-31 | 8.29E-30 | 59.7411519 |
| AGK           | -1.013976505 | 4.068712872 | 6.42E-31 | 8.43E-30 | 59.723856  |
| SYT11         | -1.025285723 | 4.757024156 | 6.50E-31 | 8.52E-30 | 59.71171   |
| NIP7          | -1.464689949 | 5.242742747 | 6.56E-31 | 8.59E-30 | 59.7022974 |
| CBLL1         | -2.259969284 | 3.809905908 | 6.68E-31 | 8.74E-30 | 59.6836717 |
| PEF1          | -1.182425416 | 7.086990914 | 6.74E-31 | 8.81E-30 | 59.6750985 |
| LINC-PINT     | -1.081641209 | 4.713156938 | 7.41E-31 | 9.67E-30 | 59.5803479 |
| FANCF         | -1.25561511  | 4.954062089 | 7.51E-31 | 9.80E-30 | 59.5665976 |
| WDR83OS       | -1.093980753 | 8.420754081 | 7.59E-31 | 9.90E-30 | 59.5556962 |
| RRS1          | -1.519747221 | 6.080735618 | 7.70E-31 | 1.00E-29 | 59.5419384 |
| PDE3B         | -1.73909201  | 5.263661538 | 7.76E-31 | 1.01E-29 | 59.5333554 |
| PM20D1        | -1.047838189 | 3.353627199 | 7.79E-31 | 1.01E-29 | 59.5298714 |
| FAM102B       | -2.611017468 | 3.924479311 | 8.31E-31 | 1.08E-29 | 59.4652752 |
| QDPR          | -1.023097479 | 5.334743419 | 8.49E-31 | 1.10E-29 | 59.4439996 |

|               |              |             |          |          |            |
|---------------|--------------|-------------|----------|----------|------------|
| MCRS1         | -1.112791295 | 6.862232986 | 8.58E-31 | 1.11E-29 | 59.4325159 |
| ASB16-AS1     | -1.111282613 | 4.826557236 | 8.81E-31 | 1.14E-29 | 59.4064071 |
| PPP2CA        | -1.626745294 | 5.184187914 | 8.90E-31 | 1.15E-29 | 59.3963022 |
| TCEB1         | -1.582894618 | 4.191804453 | 9.12E-31 | 1.18E-29 | 59.3719534 |
| CXCL5         | -1.288511517 | 2.953245351 | 9.27E-31 | 1.20E-29 | 59.3555243 |
| KDM1B         | -1.316582529 | 4.041399547 | 9.34E-31 | 1.21E-29 | 59.3480667 |
| PREPL         | -1.216948996 | 3.606315949 | 9.68E-31 | 1.24E-29 | 59.3125897 |
| CELF6         | -1.124856961 | 3.69006115  | 9.79E-31 | 1.26E-29 | 59.301038  |
| LPPR2         | -1.039353125 | 7.299692708 | 9.82E-31 | 1.26E-29 | 59.2980862 |
| SLC35B3       | -1.866794463 | 4.098619749 | 1.01E-30 | 1.29E-29 | 59.271128  |
| LINC00266-1   | -1.630638771 | 3.792674519 | 1.03E-30 | 1.32E-29 | 59.2524289 |
| WBP11         | -1.374643115 | 5.466420801 | 1.07E-30 | 1.37E-29 | 59.2079054 |
| MAP3K14       | -1.152852922 | 5.950618429 | 1.08E-30 | 1.38E-29 | 59.2003413 |
| SLC41A1       | -1.230979769 | 5.640744418 | 1.27E-30 | 1.62E-29 | 59.0403198 |
| ATG2B         | -1.143169197 | 4.176018715 | 1.28E-30 | 1.62E-29 | 59.0348936 |
| ATP13A3       | -1.627598133 | 4.4284366   | 1.30E-30 | 1.65E-29 | 59.0190909 |
| RNF44         | -2.043899144 | 7.958928052 | 1.35E-30 | 1.71E-29 | 58.9809583 |
| CACYBP        | -1.417372424 | 5.17979798  | 1.35E-30 | 1.72E-29 | 58.9759407 |
| HACE1         | -1.503772943 | 3.550661834 | 1.36E-30 | 1.72E-29 | 58.9723315 |
| STX16         | -1.208258662 | 6.944845864 | 1.37E-30 | 1.74E-29 | 58.9605735 |
| SRSF5         | -1.542915749 | 6.828943795 | 1.41E-30 | 1.78E-29 | 58.9386898 |
| FAM199X       | -1.590129459 | 4.551826446 | 1.53E-30 | 1.93E-29 | 58.8551635 |
| C9orf64       | -1.276162187 | 6.398518307 | 1.58E-30 | 1.99E-29 | 58.8203552 |
| PSMA5         | -1.21320626  | 5.303504702 | 1.61E-30 | 2.03E-29 | 58.8031573 |
| TANGO6        | -1.033277571 | 5.269686788 | 1.73E-30 | 2.17E-29 | 58.7298154 |
| IDS           | -1.020178472 | 5.705386188 | 1.75E-30 | 2.20E-29 | 58.7177056 |
| CHMP1B        | -1.523124361 | 6.490409268 | 1.77E-30 | 2.22E-29 | 58.7082171 |
| HOOK3         | -1.185798979 | 4.086207416 | 1.78E-30 | 2.23E-29 | 58.7025653 |
| KLF7          | -1.188219355 | 5.797872517 | 1.78E-30 | 2.23E-29 | 58.7006563 |
| SCYL3         | -1.716993859 | 4.353787138 | 1.81E-30 | 2.26E-29 | 58.6856087 |
| MASTL         | -1.14099665  | 2.889797055 | 1.94E-30 | 2.42E-29 | 58.6146803 |
| RDH11         | -1.064293713 | 5.173284572 | 1.96E-30 | 2.45E-29 | 58.6046063 |
| HSPA14        | -1.162758873 | 4.575933237 | 1.99E-30 | 2.49E-29 | 58.5888706 |
| BTBD3         | -1.290990322 | 3.265274396 | 2.03E-30 | 2.53E-29 | 58.5688151 |
| RP11-112J3.16 | -1.379747748 | 3.276803491 | 2.05E-30 | 2.55E-29 | 58.561409  |
| ZNF556        | -1.091529743 | 3.912894045 | 2.05E-30 | 2.55E-29 | 58.5601741 |
| MON2          | -1.502339042 | 4.440773659 | 2.10E-30 | 2.61E-29 | 58.5376534 |
| GRAMD1C       | -1.822217649 | 2.998732123 | 2.12E-30 | 2.63E-29 | 58.5258309 |
| MCM3          | -1.082400505 | 6.290417188 | 2.39E-30 | 2.95E-29 | 58.4076821 |
| RFNG          | -1.201865721 | 5.863261395 | 2.48E-30 | 3.06E-29 | 58.3686356 |
| SETD1B        | -1.219343741 | 8.305651513 | 2.56E-30 | 3.15E-29 | 58.3395314 |
| WASF3         | -1.431299481 | 3.187002853 | 2.69E-30 | 3.31E-29 | 58.2874817 |
| DET1          | -1.115674264 | 5.307523822 | 2.77E-30 | 3.41E-29 | 58.2570472 |
| EML4          | -1.168843813 | 6.102174208 | 2.99E-30 | 3.67E-29 | 58.1836774 |
| RAB39B        | -1.377429162 | 3.178366826 | 3.05E-30 | 3.74E-29 | 58.1631265 |
| PM20D2        | -1.581409049 | 3.580778331 | 3.12E-30 | 3.81E-29 | 58.1393091 |
| BTF3L4        | -1.069823119 | 4.438108711 | 3.13E-30 | 3.82E-29 | 58.1363223 |
| MSANTD2       | -2.20447631  | 4.757006445 | 3.18E-30 | 3.88E-29 | 58.1191385 |
| SFT2D2        | -1.292658014 | 6.149999481 | 3.28E-30 | 3.98E-29 | 58.089261  |
| ZDHHC20       | -1.427010393 | 4.549571001 | 3.30E-30 | 4.00E-29 | 58.0838474 |
| RPS6KC1       | -1.447168088 | 4.155654941 | 3.30E-30 | 4.01E-29 | 58.0819913 |
| C12orf10      | -1.266707959 | 6.883933592 | 3.46E-30 | 4.18E-29 | 58.037321  |
| RPRD1A        | -1.328806521 | 4.046923037 | 3.46E-30 | 4.18E-29 | 58.0372599 |
| SLC43A3       | -1.192112944 | 6.10358907  | 3.51E-30 | 4.24E-29 | 58.0216205 |
| FAM105A       | -1.132144143 | 4.649240669 | 3.65E-30 | 4.38E-29 | 57.9829478 |
| ZNF780A       | -1.320726904 | 3.134131773 | 3.73E-30 | 4.46E-29 | 57.9619431 |
| TXNDC15       | -1.24259497  | 6.026494037 | 3.88E-30 | 4.65E-29 | 57.9202945 |
| EHBP1         | -1.309951597 | 4.178267502 | 3.92E-30 | 4.69E-29 | 57.9096201 |

|               |              |             |          |          |            |
|---------------|--------------|-------------|----------|----------|------------|
| PHF10         | -1.519702392 | 5.285542887 | 3.93E-30 | 4.70E-29 | 57.9082727 |
| BRAT1         | -1.00650996  | 6.549519431 | 3.97E-30 | 4.74E-29 | 57.8993268 |
| XXYLT1        | -1.009303171 | 4.944146629 | 4.02E-30 | 4.80E-29 | 57.8854287 |
| FAM114A2      | -1.39858433  | 5.005614444 | 4.02E-30 | 4.80E-29 | 57.8850883 |
| TNFRSF8       | -1.182720585 | 5.420039242 | 4.04E-30 | 4.81E-29 | 57.8810382 |
| ADORA2B       | -1.104847397 | 4.102118281 | 4.08E-30 | 4.86E-29 | 57.8699495 |
| PIM3          | -1.510326182 | 7.722933358 | 4.14E-30 | 4.92E-29 | 57.856882  |
| SH2D1B        | -2.053420498 | 4.213868335 | 4.19E-30 | 4.98E-29 | 57.8450048 |
| PRR14         | -1.201993547 | 6.534692599 | 4.24E-30 | 5.03E-29 | 57.8332519 |
| SLC35E3       | -1.06902746  | 5.632665319 | 4.25E-30 | 5.05E-29 | 57.8303493 |
| UPRT          | -1.689278759 | 4.055672367 | 4.28E-30 | 5.08E-29 | 57.8222962 |
| SOCS5         | -1.284972098 | 3.214056627 | 4.32E-30 | 5.12E-29 | 57.813204  |
| ARID1A        | -1.156220943 | 7.16999935  | 4.38E-30 | 5.18E-29 | 57.8003121 |
| CBLB          | -1.313581646 | 4.470837298 | 4.52E-30 | 5.35E-29 | 57.7676243 |
| C15orf40      | -1.210569169 | 3.727375663 | 4.53E-30 | 5.35E-29 | 57.7654269 |
| TSEN15        | -1.105737173 | 5.088526939 | 4.59E-30 | 5.41E-29 | 57.7537236 |
| HERC4         | -1.232270554 | 3.807079169 | 4.70E-30 | 5.54E-29 | 57.7295681 |
| NSUN4         | -1.025188591 | 4.784309189 | 4.79E-30 | 5.64E-29 | 57.7099264 |
| TDRD12        | -1.015825287 | 3.770410475 | 4.86E-30 | 5.72E-29 | 57.6962782 |
| TM9SF1        | -1.127164584 | 5.064096191 | 5.18E-30 | 6.09E-29 | 57.6316933 |
| YIPF3         | -1.131936522 | 7.367593552 | 5.21E-30 | 6.13E-29 | 57.6257622 |
| KLHL28        | -1.626991925 | 6.04152617  | 5.24E-30 | 6.16E-29 | 57.6195879 |
| AK097370      | -1.103932885 | 4.686587096 | 5.34E-30 | 6.27E-29 | 57.6003696 |
| CD300C        | -1.047112874 | 6.646303928 | 5.38E-30 | 6.30E-29 | 57.5940564 |
| SLC38A6       | -1.304575435 | 3.266301427 | 5.44E-30 | 6.35E-29 | 57.5829847 |
| BMS1P5        | -1.605079384 | 4.423257664 | 5.47E-30 | 6.39E-29 | 57.5766773 |
| RNF2          | -1.189500273 | 3.687503847 | 5.53E-30 | 6.45E-29 | 57.5664145 |
| RP11-649A18.7 | -1.077508527 | 3.837156409 | 5.58E-30 | 6.49E-29 | 57.5575742 |
| DNAJA3        | -1.231210407 | 6.732632613 | 5.62E-30 | 6.54E-29 | 57.5499995 |
| PSMD11        | -1.176058472 | 6.250119525 | 5.72E-30 | 6.65E-29 | 57.5314747 |
| GYS1          | -1.119354317 | 6.609354903 | 6.00E-30 | 6.96E-29 | 57.4838593 |
| CLCN6         | -1.075758623 | 5.485144861 | 6.23E-30 | 7.21E-29 | 57.4459281 |
| LINC01125     | -1.147755519 | 4.130661896 | 6.32E-30 | 7.31E-29 | 57.4323989 |
| TMEM55B       | -1.293792775 | 6.830017996 | 6.33E-30 | 7.32E-29 | 57.4304274 |
| DNPEP         | -1.204835581 | 5.990955918 | 6.36E-30 | 7.35E-29 | 57.4253108 |
| LINC01029     | -1.029548404 | 3.915851819 | 6.46E-30 | 7.45E-29 | 57.4103557 |
| PDS5A         | -1.617639882 | 4.786753637 | 6.58E-30 | 7.58E-29 | 57.3926475 |
| SLC13A4       | 1.045306949  | 5.580870383 | 6.62E-30 | 7.62E-29 | 57.3860373 |
| CD200         | -1.567636653 | 3.75401041  | 7.16E-30 | 8.21E-29 | 57.3077934 |
| RP11-680G24.5 | -1.261818866 | 4.012710287 | 7.31E-30 | 8.38E-29 | 57.2860163 |
| HAPLN4        | -1.084040989 | 4.384833273 | 7.34E-30 | 8.40E-29 | 57.2826266 |
| ZNF786        | -1.1831795   | 4.314095894 | 7.43E-30 | 8.50E-29 | 57.2705381 |
| PDIK1L        | -1.357106249 | 3.190940397 | 7.71E-30 | 8.78E-29 | 57.2336209 |
| DDOST         | -1.497857823 | 8.226656676 | 7.90E-30 | 8.99E-29 | 57.2089178 |
| NUS1          | -1.578640878 | 4.807592229 | 7.91E-30 | 9.00E-29 | 57.2074049 |
| NUP35         | -1.651699374 | 4.379898529 | 8.28E-30 | 9.40E-29 | 57.1621328 |
| BIRC3         | -2.038448966 | 5.227362782 | 8.32E-30 | 9.44E-29 | 57.1566631 |
| SMAGP         | -1.07107981  | 5.419798035 | 8.43E-30 | 9.56E-29 | 57.1439156 |
| TTN-AS1       | -1.323436849 | 4.744210531 | 8.46E-30 | 9.59E-29 | 57.1399764 |
| PIK3C2A       | -1.143783226 | 4.62871374  | 9.30E-30 | 1.05E-28 | 57.0452787 |
| RBM48         | -1.029073663 | 4.151452209 | 9.40E-30 | 1.06E-28 | 57.0344097 |
| TAF2          | -1.279156215 | 5.337014642 | 9.47E-30 | 1.07E-28 | 57.0268072 |
| RAD54L        | -1.09047081  | 4.458666021 | 9.89E-30 | 1.11E-28 | 56.9836963 |
| CSE1L         | -1.359100951 | 5.153228388 | 1.00E-29 | 1.12E-28 | 56.9718939 |
| MTMR3         | -1.020331856 | 6.579028763 | 1.04E-29 | 1.17E-28 | 56.9344678 |
| CBX4          | -1.15727513  | 6.42953464  | 1.06E-29 | 1.18E-28 | 56.9176642 |
| GATAD1        | -1.207146197 | 5.572430123 | 1.06E-29 | 1.19E-28 | 56.9127835 |
| USP48         | -1.103242807 | 5.535924452 | 1.08E-29 | 1.21E-28 | 56.8962739 |

|                |              |             |          |          |            |
|----------------|--------------|-------------|----------|----------|------------|
| TMOD3          | -1.399797503 | 4.413208391 | 1.09E-29 | 1.22E-28 | 56.8834391 |
| RP1-102H19.8   | -1.059562033 | 2.884141624 | 1.10E-29 | 1.23E-28 | 56.877068  |
| RRN3           | -2.337432207 | 4.16244241  | 1.12E-29 | 1.25E-28 | 56.8548801 |
| CEP68          | -1.272811326 | 5.749718166 | 1.16E-29 | 1.29E-28 | 56.8246515 |
| PGM2           | -1.955742795 | 5.151985706 | 1.21E-29 | 1.35E-28 | 56.7785324 |
| LOC100130357   | -1.101259352 | 4.215780674 | 1.24E-29 | 1.38E-28 | 56.759321  |
| EXOC6          | -1.281681466 | 5.00506083  | 1.28E-29 | 1.42E-28 | 56.7244015 |
| RYK            | -1.045949828 | 4.974206069 | 1.31E-29 | 1.45E-28 | 56.7049406 |
| SAR1B          | -1.014997257 | 4.501493827 | 1.33E-29 | 1.48E-28 | 56.6856968 |
| IKBKAP         | -1.258458104 | 4.214738868 | 1.34E-29 | 1.48E-28 | 56.6791079 |
| C8orf33        | -1.101046031 | 4.592665515 | 1.34E-29 | 1.49E-28 | 56.6777974 |
| HACL1          | -1.384311797 | 5.59698798  | 1.42E-29 | 1.57E-28 | 56.6186299 |
| ACYP1          | -1.259810207 | 3.708010198 | 1.44E-29 | 1.59E-28 | 56.6064106 |
| NUP54          | -1.051361745 | 3.285929808 | 1.52E-29 | 1.67E-28 | 56.5552944 |
| SERPINB2       | -1.604062671 | 4.311151996 | 1.54E-29 | 1.69E-28 | 56.5395841 |
| ATP6V1E2       | -1.07035443  | 4.967418619 | 1.55E-29 | 1.71E-28 | 56.5303008 |
| MGRN1          | -1.575655767 | 7.484252947 | 1.57E-29 | 1.73E-28 | 56.5183976 |
| TMEM168        | -2.131574186 | 4.337753846 | 1.65E-29 | 1.81E-28 | 56.4684943 |
| MAGEH1         | -1.584778763 | 4.987653342 | 1.71E-29 | 1.87E-28 | 56.4359188 |
| BRICD5         | -1.21541876  | 5.797372595 | 1.72E-29 | 1.87E-28 | 56.4318058 |
| TMED2          | -2.14973642  | 5.358378492 | 1.78E-29 | 1.94E-28 | 56.3972225 |
| HAVCR1         | -1.083077493 | 3.001103725 | 1.79E-29 | 1.95E-28 | 56.3909864 |
| ALG9           | -1.036352403 | 4.390470288 | 1.79E-29 | 1.95E-28 | 56.3895954 |
| SNRPB2         | -1.058201783 | 4.863048073 | 1.82E-29 | 1.98E-28 | 56.3720328 |
| PRKCH          | -1.069325599 | 6.071546718 | 1.83E-29 | 1.99E-28 | 56.3690656 |
| PHTF2          | -1.104998773 | 3.715414538 | 1.83E-29 | 1.99E-28 | 56.3662742 |
| MOB1B          | -1.975019776 | 3.107583509 | 1.85E-29 | 2.01E-28 | 56.3580787 |
| ARHGAP12       | -1.947974034 | 3.381172083 | 1.90E-29 | 2.06E-28 | 56.3295272 |
| ENY2           | -1.143668836 | 4.426352305 | 1.94E-29 | 2.11E-28 | 56.3063941 |
| LTV1           | -1.124048887 | 4.440085735 | 1.97E-29 | 2.13E-28 | 56.2945348 |
| SOX8           | -1.025948997 | 3.609480947 | 2.08E-29 | 2.24E-28 | 56.2389618 |
| CD38           | -1.309285004 | 5.240851441 | 2.14E-29 | 2.31E-28 | 56.2098747 |
| RP11-196G18.24 | -2.084204351 | 3.93399048  | 2.19E-29 | 2.36E-28 | 56.1881087 |
| AC006026.13    | -1.092348655 | 3.754814781 | 2.21E-29 | 2.38E-28 | 56.1772449 |
| INPP4A         | -1.321674699 | 5.805855284 | 2.26E-29 | 2.43E-28 | 56.153558  |
| ZDHHC13        | -1.088465241 | 4.707923528 | 2.29E-29 | 2.45E-28 | 56.144402  |
| PTPN22         | -1.315447009 | 3.60237328  | 2.39E-29 | 2.56E-28 | 56.1000043 |
| TSPAN11        | -1.014055032 | 5.076298437 | 2.39E-29 | 2.56E-28 | 56.0979353 |
| TTC9C          | -1.409616962 | 5.571240368 | 2.43E-29 | 2.59E-28 | 56.0849018 |
| MEIS1          | -1.092076879 | 3.67667829  | 2.47E-29 | 2.63E-28 | 56.0686099 |
| HIATL2         | -1.033115225 | 6.638389984 | 2.49E-29 | 2.65E-28 | 56.0596164 |
| TRIM35         | -1.111033132 | 4.74158237  | 2.57E-29 | 2.74E-28 | 56.0266119 |
| PIGA           | -1.254016837 | 2.781761136 | 2.59E-29 | 2.76E-28 | 56.0177825 |
| METTL21A       | -1.425585023 | 3.861409836 | 2.64E-29 | 2.81E-28 | 55.9984906 |
| ZNF37BP        | -1.284987923 | 4.190222242 | 2.65E-29 | 2.81E-28 | 55.9961201 |
| TAF1A          | -1.13103523  | 2.814013519 | 2.65E-29 | 2.81E-28 | 55.9955801 |
| ZNF45          | -1.376116956 | 3.756327179 | 2.66E-29 | 2.82E-28 | 55.991723  |
| N4BP2          | -1.939920496 | 3.978179721 | 2.76E-29 | 2.93E-28 | 55.9554158 |
| F8             | -1.431021721 | 4.622317858 | 2.78E-29 | 2.94E-28 | 55.949068  |
| MED17          | -1.381469723 | 5.002874824 | 2.89E-29 | 3.06E-28 | 55.9079689 |
| RNF19B         | -1.775165973 | 6.82954753  | 2.91E-29 | 3.08E-28 | 55.9017156 |
| PKD2           | -1.685085643 | 3.12444266  | 2.94E-29 | 3.10E-28 | 55.8928999 |
| PLOD3          | -1.014692975 | 6.014374017 | 3.02E-29 | 3.18E-28 | 55.8658905 |
| GFM2           | -1.024317636 | 3.503524869 | 3.02E-29 | 3.19E-28 | 55.8649261 |
| TTY15          | -1.141274196 | 3.862066452 | 3.05E-29 | 3.21E-28 | 55.8560176 |
| CENPC          | -1.782963707 | 3.945514376 | 3.09E-29 | 3.25E-28 | 55.842443  |
| PCID2          | -1.35182866  | 5.842760046 | 3.40E-29 | 3.56E-28 | 55.7472601 |
| SLC25A43       | -1.937323024 | 3.350185476 | 3.60E-29 | 3.77E-28 | 55.6893918 |

|               |              |             |          |          |            |
|---------------|--------------|-------------|----------|----------|------------|
| BCS1L         | -1.087038522 | 5.939442416 | 3.76E-29 | 3.92E-28 | 55.6457894 |
| ERN1          | -1.283142263 | 5.441338789 | 3.80E-29 | 3.96E-28 | 55.6337567 |
| ZC3H8         | -1.01655954  | 4.287838051 | 3.83E-29 | 3.99E-28 | 55.6261912 |
| GSR           | -1.001644234 | 6.05386268  | 4.03E-29 | 4.19E-28 | 55.5755771 |
| PIKFYVE       | -1.335200071 | 4.838434093 | 4.07E-29 | 4.23E-28 | 55.5659577 |
| TGIF1         | -1.054810221 | 5.110681826 | 4.12E-29 | 4.27E-28 | 55.5544306 |
| EFHD1         | -1.086743576 | 4.309404877 | 4.18E-29 | 4.33E-28 | 55.5404084 |
| NSMCE4A       | -1.036811683 | 4.635886704 | 4.19E-29 | 4.34E-28 | 55.5367256 |
| RP2           | -1.881117454 | 3.740736463 | 4.45E-29 | 4.60E-28 | 55.4772634 |
| RP11-548H18.2 | -1.431251253 | 4.448428838 | 4.49E-29 | 4.64E-28 | 55.4676217 |
| RADIL         | -1.065162001 | 5.337732906 | 4.56E-29 | 4.70E-28 | 55.4527829 |
| ZMAT3         | -1.171675778 | 5.498007212 | 4.61E-29 | 4.74E-28 | 55.4424429 |
| NARS2         | -1.485047641 | 5.047604331 | 4.62E-29 | 4.75E-28 | 55.4401715 |
| LOC100133131  | -1.333716544 | 3.547743607 | 4.71E-29 | 4.84E-28 | 55.4198092 |
| MLLT3         | -1.388105297 | 4.518982529 | 5.02E-29 | 5.14E-28 | 55.3558167 |
| CREBZF        | -1.03754772  | 3.700769578 | 5.23E-29 | 5.34E-28 | 55.3158795 |
| RNF34         | -1.20816891  | 5.778586973 | 5.26E-29 | 5.36E-28 | 55.3100483 |
| CYCS          | -1.528436074 | 4.744189575 | 5.41E-29 | 5.52E-28 | 55.2813029 |
| CHN1          | -1.09094966  | 5.069038872 | 5.46E-29 | 5.56E-28 | 55.2716997 |
| ASF1B         | -1.305767013 | 5.903740261 | 5.50E-29 | 5.60E-28 | 55.2650898 |
| RNF166        | -2.187503801 | 6.7609142   | 5.81E-29 | 5.91E-28 | 55.2101377 |
| GGH           | -1.118679564 | 3.325461624 | 5.95E-29 | 6.05E-28 | 55.1853092 |
| CD8B          | -1.105757523 | 3.82178934  | 6.33E-29 | 6.43E-28 | 55.1243302 |
| SMIM14        | -1.245272492 | 5.230092393 | 6.55E-29 | 6.65E-28 | 55.0896428 |
| NOG           | -2.269426366 | 4.116807741 | 7.01E-29 | 7.10E-28 | 55.0210881 |
| CDC37         | -1.082469585 | 7.760815617 | 7.09E-29 | 7.17E-28 | 55.0094968 |
| LOC100129461  | -1.119994742 | 4.066556254 | 7.14E-29 | 7.22E-28 | 55.0025063 |
| HNRNPD        | -1.104088778 | 5.689353568 | 7.24E-29 | 7.31E-28 | 54.9888298 |
| ABCD3         | -1.755854312 | 3.968861204 | 7.32E-29 | 7.39E-28 | 54.9785981 |
| VEZT          | -1.029002495 | 3.115390241 | 7.34E-29 | 7.40E-28 | 54.9756722 |
| RP11-288L9.1  | 1.279104874  | 5.569957118 | 7.42E-29 | 7.49E-28 | 54.9641693 |
| ZNF224        | -1.128505664 | 4.383630864 | 7.63E-29 | 7.69E-28 | 54.9361694 |
| CCDC90B       | -1.00422352  | 4.900785039 | 7.63E-29 | 7.69E-28 | 54.9359447 |
| NR3C2         | -1.515067402 | 3.97617347  | 7.88E-29 | 7.92E-28 | 54.904417  |
| HYOU1         | -1.20888645  | 7.529358885 | 8.38E-29 | 8.41E-28 | 54.8428365 |
| CHST7         | -1.569735436 | 6.000900057 | 8.41E-29 | 8.43E-28 | 54.8394167 |
| FAM212B-AS1   | -1.17736088  | 5.288290531 | 8.45E-29 | 8.47E-28 | 54.8340202 |
| PPP1R21       | -1.86029921  | 5.796326606 | 8.56E-29 | 8.57E-28 | 54.8213699 |
| FAM171A1      | -1.34302141  | 5.173263615 | 8.91E-29 | 8.92E-28 | 54.7812237 |
| HS2ST1        | -1.234892133 | 3.212961192 | 8.94E-29 | 8.95E-28 | 54.7774122 |
| BZRAP1-AS1    | -1.738643978 | 6.560622211 | 9.17E-29 | 9.17E-28 | 54.7519922 |
| FBXO8         | -1.646120506 | 4.016242793 | 9.34E-29 | 9.33E-28 | 54.7340742 |
| ERLEC1        | -1.220938623 | 4.97331777  | 9.88E-29 | 9.84E-28 | 54.6774717 |
| CCDC186       | -1.682295195 | 3.740780075 | 1.04E-28 | 1.03E-27 | 54.6298852 |
| LETMD1        | -1.268872285 | 6.825814659 | 1.08E-28 | 1.07E-27 | 54.5872072 |
| SLC30A9       | -1.217881844 | 3.179300318 | 1.15E-28 | 1.14E-27 | 54.5258315 |
| SLC39A6       | -1.655413404 | 4.756144132 | 1.17E-28 | 1.16E-27 | 54.5052982 |
| FLI1          | -2.10670237  | 5.561597559 | 1.19E-28 | 1.17E-27 | 54.4940812 |
| ACRC          | -1.383319252 | 3.856844216 | 1.20E-28 | 1.18E-27 | 54.4849575 |
| LINC00282     | -1.54301184  | 4.826689694 | 1.26E-28 | 1.24E-27 | 54.4347355 |
| FRYL          | -1.012188288 | 4.835333473 | 1.31E-28 | 1.29E-27 | 54.3988374 |
| UBA2          | -1.547162382 | 5.644715368 | 1.32E-28 | 1.30E-27 | 54.3874957 |
| MTRR          | -1.484243266 | 4.81940625  | 1.32E-28 | 1.30E-27 | 54.384065  |
| ARIH1         | -1.102410163 | 5.47166434  | 1.34E-28 | 1.32E-27 | 54.3702303 |
| TATDN3        | -1.042190921 | 4.957541618 | 1.35E-28 | 1.32E-27 | 54.3661291 |
| C10orf32      | -2.539772941 | 4.414133029 | 1.35E-28 | 1.33E-27 | 54.3653135 |
| TNFSF4        | -1.685497724 | 4.581950141 | 1.35E-28 | 1.33E-27 | 54.3627299 |
| YPEL1         | -1.058853675 | 5.260908719 | 1.38E-28 | 1.35E-27 | 54.3451035 |

|              |              |             |          |          |            |
|--------------|--------------|-------------|----------|----------|------------|
| ZNF137P      | -1.778504793 | 4.643577661 | 1.40E-28 | 1.37E-27 | 54.32906   |
| SEL1L3       | -1.162256117 | 4.816642031 | 1.43E-28 | 1.40E-27 | 54.3080502 |
| DAGLB        | -1.007990683 | 5.338421795 | 1.44E-28 | 1.41E-27 | 54.3016281 |
| C12orf43     | -1.279492994 | 5.030113676 | 1.46E-28 | 1.43E-27 | 54.2858644 |
| SCAMP1       | -1.005560015 | 4.276082074 | 1.48E-28 | 1.45E-27 | 54.2719023 |
| ELMO2        | -1.010665279 | 6.083572012 | 1.49E-28 | 1.46E-27 | 54.2632351 |
| DIEXF        | -1.261967497 | 4.668640534 | 1.52E-28 | 1.48E-27 | 54.2470631 |
| ITPR1        | -1.227604566 | 5.403413474 | 1.53E-28 | 1.49E-27 | 54.2408991 |
| CCNY         | -1.243640312 | 5.890933274 | 1.54E-28 | 1.50E-27 | 54.2341266 |
| TMEM125      | -1.264725031 | 4.664490481 | 1.56E-28 | 1.52E-27 | 54.2221231 |
| CEP78        | -1.394658602 | 4.996523159 | 1.57E-28 | 1.53E-27 | 54.2108865 |
| XPOT         | -2.139752243 | 4.672000511 | 1.59E-28 | 1.55E-27 | 54.1981384 |
| RRAS2        | -1.36104723  | 3.758987479 | 1.68E-28 | 1.64E-27 | 54.1432321 |
| MSLN         | 1.145923098  | 3.587418272 | 1.71E-28 | 1.66E-27 | 54.1256961 |
| RP1-30M3.5   | -2.049970557 | 4.791389293 | 1.78E-28 | 1.72E-27 | 54.0898344 |
| BET1         | -1.971719547 | 4.642529753 | 1.81E-28 | 1.76E-27 | 54.0687473 |
| SNHG17       | -1.395967101 | 5.934621306 | 1.85E-28 | 1.79E-27 | 54.0471929 |
| RBM43        | -1.298756488 | 4.075805862 | 1.90E-28 | 1.83E-27 | 54.0239475 |
| CTA-246H3.12 | -1.015163189 | 4.068548001 | 1.94E-28 | 1.87E-27 | 54.0034477 |
| NELFCD       | -1.066061346 | 6.805759418 | 1.94E-28 | 1.87E-27 | 54.0015599 |
| KIDINS220    | -1.148904301 | 4.893426855 | 2.00E-28 | 1.93E-27 | 53.969477  |
| IST1         | -1.168242921 | 5.90523401  | 2.03E-28 | 1.96E-27 | 53.9574945 |
| TTC31        | -1.449433309 | 6.641369321 | 2.05E-28 | 1.98E-27 | 53.9439662 |
| KHDRBS1      | -1.25874211  | 7.090652158 | 2.20E-28 | 2.12E-27 | 53.8771803 |
| YTHDC2       | -1.316053541 | 4.228832564 | 2.44E-28 | 2.34E-27 | 53.7717097 |
| ARV1         | -1.204166464 | 4.967764201 | 2.47E-28 | 2.37E-27 | 53.7598857 |
| RHBDD2       | -1.041062969 | 6.563449227 | 2.48E-28 | 2.38E-27 | 53.7558032 |
| SEC24A       | -1.18129712  | 4.043996289 | 2.58E-28 | 2.48E-27 | 53.7142054 |
| EPB41L3      | -1.768025891 | 4.252843164 | 2.59E-28 | 2.48E-27 | 53.7137031 |
| MKLN1        | -1.185190777 | 4.802751631 | 2.66E-28 | 2.54E-27 | 53.6855109 |
| ZNF227       | -1.394293867 | 3.771849532 | 2.71E-28 | 2.59E-27 | 53.6657242 |
| CEP95        | -1.131688934 | 4.163674568 | 2.72E-28 | 2.60E-27 | 53.6617089 |
| MTFR1L       | -1.124738414 | 6.523092956 | 2.75E-28 | 2.63E-27 | 53.6521827 |
| ZNF367       | -1.098759684 | 2.694694918 | 2.78E-28 | 2.65E-27 | 53.6418746 |
| CDK5R1       | -1.26212842  | 4.049424315 | 2.95E-28 | 2.81E-27 | 53.583096  |
| HIBCH        | -1.514631134 | 4.257696076 | 3.04E-28 | 2.89E-27 | 53.5531421 |
| BBS2         | -1.648176848 | 4.968819274 | 3.09E-28 | 2.94E-27 | 53.534682  |
| SF3A1        | -1.026645529 | 7.231706865 | 3.19E-28 | 3.03E-27 | 53.5042149 |
| SPAST        | -2.397782564 | 4.625253357 | 3.22E-28 | 3.06E-27 | 53.4931021 |
| AUH          | -1.377490351 | 4.409988351 | 3.26E-28 | 3.09E-27 | 53.4825045 |
| PDP2         | -1.172906844 | 4.272467313 | 3.27E-28 | 3.10E-27 | 53.4775877 |
| RP4-635E18.8 | -1.606540178 | 5.321607471 | 3.28E-28 | 3.11E-27 | 53.4761144 |
| APC          | -1.281387448 | 4.829657093 | 3.34E-28 | 3.16E-27 | 53.4571125 |
| MRPS14       | -1.114196697 | 5.167390117 | 3.38E-28 | 3.20E-27 | 53.4458531 |
| SSBP1        | -1.037250553 | 5.906892471 | 3.45E-28 | 3.26E-27 | 53.4245317 |
| LARS         | -1.185226652 | 6.703740821 | 3.50E-28 | 3.30E-27 | 53.411563  |
| CTNNB1       | -1.08546823  | 5.337965985 | 3.58E-28 | 3.37E-27 | 53.3881947 |
| RBM7         | -1.818877348 | 5.174304689 | 3.85E-28 | 3.62E-27 | 53.3142953 |
| ERO1L        | -1.590133803 | 5.916640733 | 3.96E-28 | 3.72E-27 | 53.2858089 |
| LOC101927204 | -1.0378466   | 4.309342604 | 4.07E-28 | 3.81E-27 | 53.2591686 |
| MIA3         | -1.000916947 | 5.171630047 | 4.12E-28 | 3.85E-27 | 53.2459088 |
| BRPF1        | -1.171417992 | 6.115641829 | 4.20E-28 | 3.92E-27 | 53.2289702 |
| CNTRL        | -1.55740768  | 5.025495062 | 4.27E-28 | 3.98E-27 | 53.210804  |
| SMARCC2      | -1.513204904 | 6.306063583 | 4.41E-28 | 4.10E-27 | 53.1795694 |
| NIPA2        | -1.032682438 | 6.698852359 | 4.44E-28 | 4.13E-27 | 53.1730554 |
| RUFY3        | -1.002378868 | 4.643355189 | 4.49E-28 | 4.18E-27 | 53.1599462 |
| PDGFD        | -1.174455672 | 4.694282805 | 4.82E-28 | 4.48E-27 | 53.089003  |
| TRMT10B      | -1.048302013 | 5.079040988 | 4.83E-28 | 4.48E-27 | 53.0878228 |

|           |              |             |          |          |            |
|-----------|--------------|-------------|----------|----------|------------|
| METTL2B   | -1.340120091 | 4.171070736 | 4.84E-28 | 4.49E-27 | 53.0857956 |
| PRPF38A   | -1.136633262 | 5.159388139 | 4.87E-28 | 4.52E-27 | 53.0787056 |
| CEP135    | -1.739152995 | 3.841271064 | 4.89E-28 | 4.54E-27 | 53.0748499 |
| NUP62     | -1.336338999 | 5.197279623 | 5.66E-28 | 5.23E-27 | 52.9288967 |
| LINC00959 | -1.245374569 | 3.768889068 | 5.71E-28 | 5.28E-27 | 52.9195261 |
| ZNF818P   | -1.352419861 | 3.959211441 | 5.80E-28 | 5.36E-27 | 52.9044603 |
| SEC63     | -1.443277568 | 4.455881076 | 5.85E-28 | 5.40E-27 | 52.8964355 |
| MLF2      | -1.094555821 | 8.437638172 | 6.07E-28 | 5.60E-27 | 52.8594976 |
| SLAIN2    | -1.144659198 | 4.869642964 | 6.18E-28 | 5.70E-27 | 52.8410102 |
| TAS2R39   | -1.034012924 | 3.928132463 | 6.97E-28 | 6.41E-27 | 52.7209034 |
| ZNF611    | -1.109247695 | 4.297304502 | 7.18E-28 | 6.60E-27 | 52.6899722 |
| CASP8AP2  | -1.62759286  | 4.067975467 | 7.35E-28 | 6.74E-27 | 52.6674325 |
| CAPZB     | -1.014294712 | 7.962056998 | 7.69E-28 | 7.04E-27 | 52.6212335 |
| ALDH9A1   | -1.21670474  | 8.352350478 | 7.83E-28 | 7.15E-27 | 52.6040262 |
| GLTSCR2   | 1.554264412  | 5.871226742 | 7.85E-28 | 7.17E-27 | 52.6015254 |
| CD300LF   | -1.375321415 | 8.404518512 | 7.88E-28 | 7.19E-27 | 52.5979628 |
| S100PBP   | -1.67438488  | 5.440317075 | 8.30E-28 | 7.56E-27 | 52.5454889 |
| SRPK2     | -1.668068173 | 5.466568072 | 8.35E-28 | 7.60E-27 | 52.539383  |
| CBX7      | -1.192382798 | 8.353401236 | 8.62E-28 | 7.84E-27 | 52.5072517 |
| GRPEL2    | -1.087327134 | 3.390449749 | 8.64E-28 | 7.86E-27 | 52.5047194 |
| LRRC58    | -1.200342963 | 3.503989343 | 8.70E-28 | 7.91E-27 | 52.4977217 |
| AMMECR1   | -1.196447464 | 4.320820196 | 8.97E-28 | 8.14E-27 | 52.4677967 |
| ATP8B2    | -1.203956212 | 6.084822218 | 9.04E-28 | 8.21E-27 | 52.4592564 |
| PTP4A1    | -1.595597265 | 4.631310484 | 9.19E-28 | 8.32E-27 | 52.4435961 |
| UBE2V2    | -1.017578894 | 3.378152021 | 9.47E-28 | 8.56E-27 | 52.4134225 |
| SUCLG2    | -2.327190192 | 5.193181444 | 9.72E-28 | 8.78E-27 | 52.3870653 |
| PFAS      | -1.57522597  | 4.806755062 | 9.83E-28 | 8.88E-27 | 52.3756023 |
| ZNF33A    | -1.033700945 | 5.034693781 | 9.91E-28 | 8.94E-27 | 52.3677861 |
| SLC30A1   | -1.299386276 | 4.201323297 | 1.05E-27 | 9.42E-27 | 52.313131  |
| MTERF3    | -1.875322718 | 3.745046601 | 1.11E-27 | 9.93E-27 | 52.2584947 |
| RSPRY1    | -1.244854059 | 5.858809788 | 1.11E-27 | 9.93E-27 | 52.2580316 |
| NUDT16L1  | -1.252118485 | 5.240199818 | 1.11E-27 | 9.94E-27 | 52.2562913 |
| FBXO28    | -1.258773517 | 4.664567502 | 1.12E-27 | 1.00E-26 | 52.2480564 |
| NPHP3     | -1.732060275 | 4.192184973 | 1.19E-27 | 1.06E-26 | 52.1881541 |
| SARS      | -1.064322808 | 5.443901808 | 1.19E-27 | 1.06E-26 | 52.1879825 |
| BYSL      | -1.049562923 | 5.538695588 | 1.20E-27 | 1.07E-26 | 52.1775025 |
| LINC00277 | -1.001464593 | 4.839423749 | 1.28E-27 | 1.14E-26 | 52.1123239 |
| RNF38     | -1.59443947  | 5.702547526 | 1.31E-27 | 1.17E-26 | 52.0869553 |
| CBR4      | -1.253994944 | 5.628577    | 1.37E-27 | 1.22E-26 | 52.0400327 |
| PLEKHM3   | -1.34864741  | 5.314240395 | 1.38E-27 | 1.23E-26 | 52.0340376 |
| DNAJB11   | -1.206758706 | 6.376263279 | 1.42E-27 | 1.26E-26 | 52.010004  |
| NUDT13    | -1.073120488 | 3.522424243 | 1.42E-27 | 1.26E-26 | 52.006636  |
| YARS2     | -1.447923758 | 5.148391649 | 1.43E-27 | 1.27E-26 | 52.0034885 |
| NOA1      | -1.32520576  | 6.840930715 | 1.44E-27 | 1.28E-26 | 51.9937819 |
| GPATCH8   | -1.083789756 | 6.897380992 | 1.46E-27 | 1.29E-26 | 51.9800927 |
| SMARCAD1  | -1.840215733 | 4.814876499 | 1.47E-27 | 1.30E-26 | 51.9739985 |
| STAM      | -2.560043345 | 4.772471859 | 1.47E-27 | 1.31E-26 | 51.9697721 |
| ACAD8     | -1.813003268 | 5.050145709 | 1.50E-27 | 1.32E-26 | 51.9546826 |
| USP32P2   | -2.692277916 | 4.923318501 | 1.50E-27 | 1.32E-26 | 51.9545503 |
| ZNF184    | -1.343757402 | 3.845591911 | 1.51E-27 | 1.34E-26 | 51.9436771 |
| RBM12B    | -1.920961748 | 4.153864578 | 1.51E-27 | 1.34E-26 | 51.9435353 |
| RBM12     | -1.737255327 | 5.018960693 | 1.52E-27 | 1.34E-26 | 51.9422955 |
| ITFG1     | -1.191046013 | 4.019909275 | 1.55E-27 | 1.37E-26 | 51.9199154 |
| SRSF6     | -1.375517926 | 6.129786053 | 1.58E-27 | 1.39E-26 | 51.9025355 |
| ADCY10P1  | -1.064736817 | 4.540682027 | 1.59E-27 | 1.40E-26 | 51.8963108 |
| CAST      | -1.146638314 | 6.11046155  | 1.75E-27 | 1.53E-26 | 51.797904  |
| IFT80     | -1.087330667 | 3.165853678 | 1.76E-27 | 1.54E-26 | 51.793749  |
| PRIMPOL   | -1.313526076 | 4.78188038  | 1.84E-27 | 1.60E-26 | 51.7504251 |



|               |              |             |          |          |            |
|---------------|--------------|-------------|----------|----------|------------|
| IKBKB         | -1.305682038 | 5.93218508  | 1.91E-27 | 1.66E-26 | 51.7113638 |
| NEDD1         | -1.525810299 | 4.081174923 | 1.94E-27 | 1.70E-26 | 51.6922389 |
| MFN1          | -1.607010875 | 4.004846411 | 1.96E-27 | 1.71E-26 | 51.6862552 |
| LPXN          | -1.235549959 | 6.506184148 | 1.97E-27 | 1.72E-26 | 51.6796828 |
| CD47          | -1.573875501 | 6.463046504 | 2.02E-27 | 1.76E-26 | 51.656116  |
| METAP2        | -1.325705598 | 4.338087346 | 2.07E-27 | 1.80E-26 | 51.6289629 |
| SRSF4         | -1.300061059 | 5.425182405 | 2.10E-27 | 1.83E-26 | 51.6156951 |
| RP11-532F12.5 | -1.006144431 | 5.213837012 | 2.10E-27 | 1.83E-26 | 51.6147509 |
| RDH13         | -1.042460609 | 5.159124627 | 2.14E-27 | 1.86E-26 | 51.5950092 |
| LOC101928054  | -1.70491302  | 4.57924099  | 2.29E-27 | 1.99E-26 | 51.5271597 |
| ZNF143        | -1.736182103 | 5.960352727 | 2.34E-27 | 2.02E-26 | 51.5080267 |
| NEU4          | 1.010023242  | 6.418825527 | 2.36E-27 | 2.04E-26 | 51.5000626 |
| MORC2         | -1.075695896 | 5.900655996 | 2.46E-27 | 2.12E-26 | 51.4588423 |
| CDC73         | -1.568489818 | 4.147165661 | 2.52E-27 | 2.18E-26 | 51.4321042 |
| RFK           | -1.701865286 | 4.254198417 | 2.69E-27 | 2.32E-26 | 51.3665568 |
| TOR1AIP1      | -1.413478054 | 5.505437381 | 2.69E-27 | 2.32E-26 | 51.3664829 |
| MRPS10        | -1.070657901 | 5.807903705 | 2.76E-27 | 2.37E-26 | 51.3427995 |
| MDM4          | -1.179640138 | 6.233238016 | 2.83E-27 | 2.43E-26 | 51.3169086 |
| CUZD1         | -1.065020944 | 3.400321916 | 2.86E-27 | 2.45E-26 | 51.3074631 |
| HEATR3        | -1.644275393 | 3.935028784 | 2.87E-27 | 2.46E-26 | 51.3037874 |
| CELA3B        | -1.01077675  | 5.601529866 | 2.87E-27 | 2.46E-26 | 51.3020646 |
| C14orf169     | -1.092166374 | 6.217474945 | 2.95E-27 | 2.53E-26 | 51.2762381 |
| RP5-894A10.6  | -1.003963393 | 4.482559848 | 2.96E-27 | 2.54E-26 | 51.2720186 |
| MISP          | 1.391051351  | 7.301084192 | 3.01E-27 | 2.58E-26 | 51.2555743 |
| PPP1R3E       | -1.158089856 | 5.20724405  | 3.05E-27 | 2.61E-26 | 51.242956  |
| STK38         | -1.022721268 | 6.40204432  | 3.42E-27 | 2.92E-26 | 51.1266771 |
| AC009120.6    | -1.119260641 | 5.055984984 | 3.48E-27 | 2.97E-26 | 51.108981  |
| DDX18         | -1.333782049 | 6.118049298 | 3.50E-27 | 2.99E-26 | 51.1022441 |
| SCML1         | -1.610845186 | 3.848280054 | 3.55E-27 | 3.03E-26 | 51.0882852 |
| LOC101927365  | -1.453154122 | 4.176243676 | 3.59E-27 | 3.05E-26 | 51.0789144 |
| ERAP1         | -1.215389357 | 4.530055957 | 3.62E-27 | 3.08E-26 | 51.0693208 |
| TRIM27        | -1.169245282 | 7.14750029  | 3.69E-27 | 3.13E-26 | 51.0514208 |
| CHD9          | -1.208470446 | 4.176890108 | 3.74E-27 | 3.17E-26 | 51.0367168 |
| APBA2         | -1.201447865 | 6.810169194 | 3.78E-27 | 3.20E-26 | 51.0260283 |
| LRCH3         | -1.139439042 | 4.856562751 | 3.88E-27 | 3.28E-26 | 51.001075  |
| SNX1          | -1.080072586 | 5.850646658 | 4.22E-27 | 3.57E-26 | 50.9151236 |
| LOC646626     | -1.011887113 | 3.890765773 | 4.28E-27 | 3.61E-26 | 50.9016168 |
| PPM1D         | -1.162612828 | 4.782135894 | 4.29E-27 | 3.62E-26 | 50.9006637 |
| ENOPH1        | -2.197662947 | 4.965554575 | 4.45E-27 | 3.75E-26 | 50.8627089 |
| PDE7A         | -1.21942389  | 5.198926312 | 4.52E-27 | 3.80E-26 | 50.84791   |
| ARF6          | -1.455842748 | 7.175004609 | 4.61E-27 | 3.88E-26 | 50.8267088 |
| CEACAM4       | -1.118189847 | 6.978127563 | 4.66E-27 | 3.92E-26 | 50.8162318 |
| SKAP1         | -1.202684157 | 6.720684425 | 4.67E-27 | 3.93E-26 | 50.8140133 |
| NDC1          | -1.120460862 | 4.387764985 | 4.85E-27 | 4.07E-26 | 50.7771713 |
| SRD5A1        | -1.23191161  | 5.088255823 | 4.88E-27 | 4.09E-26 | 50.7707614 |
| LEO1          | -1.076935046 | 4.91394264  | 4.92E-27 | 4.13E-26 | 50.7622093 |
| HTR1B         | -1.272188708 | 3.846395178 | 4.96E-27 | 4.16E-26 | 50.7542777 |
| SPATA5L1      | -1.54450092  | 5.146447961 | 4.97E-27 | 4.16E-26 | 50.7531278 |
| PUS7          | -1.406367422 | 3.623268621 | 5.29E-27 | 4.42E-26 | 50.6900636 |
| DFNA5         | -1.249066599 | 3.767829963 | 5.32E-27 | 4.45E-26 | 50.6838423 |
| SIDT1         | -1.891701908 | 6.061544755 | 5.56E-27 | 4.63E-26 | 50.6406508 |
| POLD1         | -1.030011459 | 6.685720598 | 5.89E-27 | 4.91E-26 | 50.5814092 |
| PAN2          | -1.077471397 | 5.690986514 | 6.01E-27 | 5.00E-26 | 50.5621805 |
| PRKDC         | -1.275245335 | 5.066118034 | 6.03E-27 | 5.01E-26 | 50.5589543 |
| MSL2          | -1.971444266 | 5.782248439 | 6.08E-27 | 5.05E-26 | 50.5510692 |
| RUNDC1        | -1.184124193 | 5.370598131 | 6.21E-27 | 5.15E-26 | 50.529344  |
| DUSP12        | -1.411417253 | 5.788736831 | 6.45E-27 | 5.34E-26 | 50.4907776 |
| SYNCRIP       | -1.216825151 | 5.284320835 | 6.62E-27 | 5.47E-26 | 50.4655049 |

|              |              |             |          |          |            |
|--------------|--------------|-------------|----------|----------|------------|
| BUD13        | -1.085591579 | 5.770577468 | 6.67E-27 | 5.52E-26 | 50.456907  |
| MGEA5        | -1.574345417 | 6.879261201 | 6.69E-27 | 5.53E-26 | 50.4541288 |
| VAV3         | -1.280618803 | 4.553362344 | 6.77E-27 | 5.59E-26 | 50.4423362 |
| DENR         | -1.318721432 | 4.954755495 | 6.90E-27 | 5.69E-26 | 50.4241128 |
| IL12RB2      | -1.254104796 | 4.059757759 | 6.90E-27 | 5.69E-26 | 50.4239084 |
| POLR2G       | -1.196925418 | 8.154658387 | 7.09E-27 | 5.84E-26 | 50.3962599 |
| NEMF         | -1.624529862 | 4.798876266 | 7.15E-27 | 5.88E-26 | 50.387729  |
| TNRC6C-AS1   | -1.254892586 | 6.323871547 | 7.33E-27 | 6.03E-26 | 50.3626488 |
| ANKRD13C     | -1.058884432 | 2.937576894 | 7.62E-27 | 6.25E-26 | 50.3247951 |
| VPS54        | -1.729415623 | 4.534596754 | 7.67E-27 | 6.29E-26 | 50.3175672 |
| MTMR11       | -1.035311629 | 5.831727565 | 7.82E-27 | 6.40E-26 | 50.2986619 |
| RBM18        | -1.462106006 | 4.656905586 | 8.28E-27 | 6.77E-26 | 50.2413764 |
| SMARCE1      | -1.021861618 | 4.878287782 | 8.33E-27 | 6.81E-26 | 50.2352503 |
| HDAC1        | -1.393490526 | 7.560205411 | 8.59E-27 | 7.03E-26 | 50.2036099 |
| KIF2A        | -2.110665564 | 4.484684703 | 8.74E-27 | 7.14E-26 | 50.18674   |
| ADII         | -1.026320324 | 6.111046212 | 9.08E-27 | 7.40E-26 | 50.1489649 |
| LPCAT1       | -1.175310537 | 7.894890957 | 9.22E-27 | 7.51E-26 | 50.1337088 |
| SPTLC1       | -1.340523262 | 4.599455936 | 9.23E-27 | 7.52E-26 | 50.1320284 |
| SLC25A12     | -1.011782296 | 4.437840979 | 9.25E-27 | 7.53E-26 | 50.1300262 |
| SRSF11       | -1.650785289 | 5.017145406 | 9.63E-27 | 7.82E-26 | 50.0893026 |
| UBR3         | -1.385805856 | 3.620149815 | 9.78E-27 | 7.93E-26 | 50.0746569 |
| OPN3         | -1.592168634 | 4.732124125 | 9.92E-27 | 8.04E-26 | 50.0602607 |
| FAM162A      | -1.026756097 | 5.410750635 | 1.04E-26 | 8.44E-26 | 50.0114676 |
| MON1B        | -1.023027911 | 6.443422419 | 1.05E-26 | 8.48E-26 | 50.0063302 |
| CIRBP        | -1.093782756 | 7.236571813 | 1.05E-26 | 8.54E-26 | 49.9983437 |
| RIN2         | -1.328507531 | 4.708120861 | 1.07E-26 | 8.63E-26 | 49.9873178 |
| TYW3         | -1.275106955 | 4.385411145 | 1.08E-26 | 8.71E-26 | 49.9770182 |
| RCOR1        | -1.023070183 | 6.338870039 | 1.09E-26 | 8.81E-26 | 49.9650345 |
| TMC6         | -1.339646681 | 7.59715018  | 1.14E-26 | 9.21E-26 | 49.9205699 |
| SMAD4        | -1.129871935 | 4.397015996 | 1.18E-26 | 9.50E-26 | 49.8873917 |
| TTC4         | -1.014597088 | 5.620861509 | 1.19E-26 | 9.59E-26 | 49.8774474 |
| ALYREF       | -1.090181226 | 4.263855127 | 1.19E-26 | 9.60E-26 | 49.8764764 |
| LOC100505501 | -1.443728397 | 4.294290472 | 1.28E-26 | 1.03E-25 | 49.8071644 |
| PTCD2        | -1.084990903 | 5.155359425 | 1.28E-26 | 1.03E-25 | 49.804876  |
| GP5          | -1.029238961 | 3.212468425 | 1.38E-26 | 1.11E-25 | 49.7256817 |
| ASH1L        | -1.362371127 | 6.216979309 | 1.39E-26 | 1.12E-25 | 49.7217042 |
| PAK2         | -1.347281928 | 5.696515015 | 1.44E-26 | 1.16E-25 | 49.6853213 |
| ST6GAL1      | -1.038703053 | 4.94693671  | 1.45E-26 | 1.16E-25 | 49.6825137 |
| CCDC146      | -1.11473146  | 4.609755306 | 1.55E-26 | 1.24E-25 | 49.6099541 |
| UGDH         | -1.272126652 | 3.921471326 | 1.59E-26 | 1.27E-25 | 49.5882382 |
| FTSJ1        | -1.013168384 | 5.733605372 | 1.60E-26 | 1.27E-25 | 49.5834658 |
| PSMD7        | -1.316030685 | 7.601063571 | 1.60E-26 | 1.28E-25 | 49.5782322 |
| GALNT3       | -1.173520322 | 4.671682866 | 1.72E-26 | 1.37E-25 | 49.507213  |
| MAP7D1       | -1.339898271 | 7.360859647 | 1.80E-26 | 1.42E-25 | 49.4645656 |
| PHYH         | -1.144928683 | 3.923830646 | 1.83E-26 | 1.45E-25 | 49.4484202 |
| CBFB         | -1.336488979 | 6.350215137 | 1.84E-26 | 1.46E-25 | 49.4402577 |
| ZSCAN16      | -1.257651557 | 4.298579962 | 1.86E-26 | 1.47E-25 | 49.4305001 |
| ZKSCAN4      | -1.005122499 | 5.151165094 | 1.86E-26 | 1.47E-25 | 49.4282353 |
| SDE2         | -1.649353038 | 4.988003388 | 1.87E-26 | 1.48E-25 | 49.4243584 |
| NXT2         | -1.626331347 | 4.197153172 | 1.87E-26 | 1.48E-25 | 49.4235047 |
| ZSCAN18      | -1.225769033 | 5.954642146 | 1.91E-26 | 1.50E-25 | 49.4058994 |
| NCK1         | -1.38944008  | 4.133457561 | 1.91E-26 | 1.51E-25 | 49.4021448 |
| DIS3         | -1.307256783 | 4.409717655 | 1.94E-26 | 1.52E-25 | 49.3904416 |
| ERMP1        | -1.067861975 | 4.904419897 | 1.94E-26 | 1.52E-25 | 49.3891401 |
| DBF4         | -1.804029158 | 3.951731191 | 1.95E-26 | 1.53E-25 | 49.3847577 |
| PDE4B        | -1.880020048 | 5.126165718 | 1.98E-26 | 1.56E-25 | 49.3682026 |
| COMMD2       | -1.746199136 | 4.579424911 | 2.03E-26 | 1.60E-25 | 49.3419612 |
| CRY1         | -2.516160215 | 3.678987594 | 2.15E-26 | 1.69E-25 | 49.2854911 |

|               |              |             |          |          |            |
|---------------|--------------|-------------|----------|----------|------------|
| MAT2A         | -1.060227613 | 6.208513675 | 2.16E-26 | 1.69E-25 | 49.2824999 |
| MED1          | -1.137282548 | 5.834967817 | 2.17E-26 | 1.70E-25 | 49.2737165 |
| SART3         | -1.012944709 | 5.604434006 | 2.25E-26 | 1.76E-25 | 49.2388105 |
| HMG20A        | -1.864114048 | 4.19026696  | 2.31E-26 | 1.81E-25 | 49.2129528 |
| PIK3C2B       | -1.157113755 | 6.87959419  | 2.34E-26 | 1.83E-25 | 49.201189  |
| NAT2          | -1.019207174 | 3.732845291 | 2.37E-26 | 1.85E-25 | 49.1891328 |
| DHX36         | -1.090098958 | 6.281444671 | 2.37E-26 | 1.85E-25 | 49.1889731 |
| PRKAB2        | -1.087005554 | 4.68061634  | 2.50E-26 | 1.95E-25 | 49.1338814 |
| KIAA1147      | -1.077250695 | 6.129473177 | 2.54E-26 | 1.98E-25 | 49.1196481 |
| MGAT2         | -1.447265228 | 5.363591659 | 2.59E-26 | 2.02E-25 | 49.0985576 |
| TSHZ1         | -1.875008424 | 5.641841842 | 2.67E-26 | 2.07E-25 | 49.0691412 |
| TMF1          | -1.372713839 | 5.144880411 | 2.67E-26 | 2.08E-25 | 49.066852  |
| ENTPD4        | -1.055661117 | 6.125322163 | 2.88E-26 | 2.23E-25 | 48.9928548 |
| ACVR1C        | -1.1716765   | 3.696838298 | 2.90E-26 | 2.25E-25 | 48.9853265 |
| RP11-452L6.1  | -1.003878141 | 4.644000347 | 3.00E-26 | 2.32E-25 | 48.9514098 |
| ACADSB        | -1.00105958  | 3.169059131 | 3.09E-26 | 2.38E-25 | 48.9228405 |
| RP11-747H7.3  | -1.452837902 | 5.572191861 | 3.10E-26 | 2.40E-25 | 48.9173761 |
| KLF12         | -1.043272303 | 4.996131653 | 3.12E-26 | 2.41E-25 | 48.9127992 |
| UBE2Z         | -1.11294787  | 7.401931004 | 3.14E-26 | 2.42E-25 | 48.9059622 |
| CRTAM         | -2.156836711 | 4.254618475 | 3.21E-26 | 2.48E-25 | 48.8832855 |
| PTCD3         | -1.566170745 | 5.547231415 | 3.27E-26 | 2.52E-25 | 48.8638581 |
| COPA          | -1.102919752 | 5.448381569 | 3.33E-26 | 2.56E-25 | 48.8473374 |
| LGALS8        | -1.346384172 | 5.44260174  | 3.40E-26 | 2.61E-25 | 48.8246766 |
| ZBTB14        | -1.033141145 | 4.408346033 | 3.41E-26 | 2.62E-25 | 48.8239278 |
| SCML4         | -1.081203501 | 5.743513049 | 3.52E-26 | 2.70E-25 | 48.7920921 |
| BOD1          | -1.409351018 | 5.008717323 | 3.61E-26 | 2.77E-25 | 48.7661937 |
| LOC374443     | -1.44878169  | 4.303877951 | 3.69E-26 | 2.82E-25 | 48.7444841 |
| CSK           | -1.162050497 | 9.149324777 | 3.76E-26 | 2.88E-25 | 48.7242403 |
| ANK3          | -1.029479006 | 3.93980911  | 4.03E-26 | 3.08E-25 | 48.6551655 |
| KBTBD6        | -1.161137291 | 3.665333095 | 4.08E-26 | 3.11E-25 | 48.6439305 |
| MFF           | -1.40127873  | 5.370261601 | 4.14E-26 | 3.16E-25 | 48.6282783 |
| COX18         | -1.150932748 | 4.828366738 | 4.24E-26 | 3.24E-25 | 48.6038099 |
| PMPCA         | -1.182561127 | 6.443248845 | 4.32E-26 | 3.29E-25 | 48.5860886 |
| MED29         | -1.738599285 | 5.519372343 | 4.38E-26 | 3.34E-25 | 48.5719938 |
| RP11-226L15.5 | -1.856040907 | 3.335269621 | 4.47E-26 | 3.40E-25 | 48.5526891 |
| LIN7C         | -1.616817688 | 4.601690638 | 4.54E-26 | 3.45E-25 | 48.5364456 |
| ZNF430        | -1.514627852 | 4.834220225 | 4.59E-26 | 3.48E-25 | 48.5262427 |
| C20orf144     | -1.051646971 | 3.748948646 | 4.72E-26 | 3.59E-25 | 48.4972659 |
| C8orf76       | -1.443778538 | 3.736162123 | 4.85E-26 | 3.68E-25 | 48.4705111 |
| PADI2         | -1.243185352 | 5.764259936 | 5.43E-26 | 4.12E-25 | 48.3563797 |
| STK39         | -2.181385816 | 4.631175309 | 5.49E-26 | 4.16E-25 | 48.3456645 |
| BCL10         | -1.21675731  | 5.07795736  | 6.03E-26 | 4.56E-25 | 48.2515947 |
| THAP9-AS1     | -2.45804613  | 3.588353194 | 6.16E-26 | 4.65E-25 | 48.2309257 |
| HSDL1         | -1.249395364 | 4.403505624 | 6.18E-26 | 4.67E-25 | 48.2272215 |
| AMZ2          | -1.298086473 | 7.544070037 | 6.37E-26 | 4.80E-25 | 48.1964115 |
| RHO           | -1.109306945 | 4.068375475 | 6.46E-26 | 4.86E-25 | 48.1837854 |
| TMOD2         | -1.096466892 | 3.371034885 | 6.59E-26 | 4.95E-25 | 48.1633394 |
| COG8          | -1.06556223  | 5.937361446 | 6.69E-26 | 5.03E-25 | 48.1472771 |
| CCDC126       | -1.484374455 | 4.266733335 | 6.88E-26 | 5.16E-25 | 48.1193501 |
| C15orf37      | -1.309207712 | 5.212234368 | 7.19E-26 | 5.38E-25 | 48.0759451 |
| NET1          | -1.228071039 | 3.732798198 | 7.25E-26 | 5.43E-25 | 48.0668132 |
| LOC100129447  | -1.072702798 | 3.953282467 | 7.35E-26 | 5.50E-25 | 48.0534589 |
| C2orf68       | -1.108198424 | 6.286863266 | 7.44E-26 | 5.56E-25 | 48.0409294 |
| RP3-522P13.2  | 1.485174768  | 5.316028627 | 7.47E-26 | 5.58E-25 | 48.0380469 |
| DUSP15        | 1.261681332  | 4.696971163 | 7.50E-26 | 5.60E-25 | 48.0331304 |
| ERP27         | -1.346686575 | 6.170528793 | 7.87E-26 | 5.86E-25 | 47.9858634 |
| FAM98A        | -1.166870039 | 4.970824736 | 7.87E-26 | 5.86E-25 | 47.9852148 |
| SPCS2         | -1.134223774 | 6.683039163 | 8.06E-26 | 5.99E-25 | 47.9619302 |

|              |              |             |          |          |            |
|--------------|--------------|-------------|----------|----------|------------|
| NOXO1        | 1.049725389  | 5.452942217 | 8.10E-26 | 6.02E-25 | 47.9570357 |
| SIAH1        | -1.476466936 | 4.15090968  | 8.12E-26 | 6.04E-25 | 47.9539351 |
| PPP1CA       | -1.15594382  | 9.279888384 | 8.49E-26 | 6.30E-25 | 47.90888   |
| PEBP1        | -1.240130885 | 7.1350873   | 8.51E-26 | 6.31E-25 | 47.9067875 |
| PTPRN        | -1.19284839  | 4.141101446 | 8.82E-26 | 6.53E-25 | 47.8708172 |
| ALDH6A1      | -1.021073838 | 4.787446233 | 8.85E-26 | 6.55E-25 | 47.867552  |
| ZNF318       | -1.066326727 | 4.893986485 | 8.92E-26 | 6.59E-25 | 47.8601628 |
| MAN2B2       | -1.39407867  | 5.975100786 | 9.11E-26 | 6.73E-25 | 47.8384945 |
| PPIL4        | -1.592348471 | 2.880145844 | 9.17E-26 | 6.77E-25 | 47.8317075 |
| ELMO1        | -1.406002382 | 6.483726231 | 9.24E-26 | 6.82E-25 | 47.8245728 |
| ZBTB6        | -1.122623316 | 2.411848483 | 9.64E-26 | 7.10E-25 | 47.7823473 |
| SAMD8        | -1.575713217 | 3.82700429  | 9.90E-26 | 7.28E-25 | 47.7551087 |
| CD3E         | -1.560475081 | 8.619728078 | 9.95E-26 | 7.31E-25 | 47.750094  |
|              | 2-Sep        |             |          |          |            |
|              |              |             |          |          |            |
| BTN2A1       | -1.1415619   | 5.77875935  | 1.02E-25 | 7.47E-25 | 47.7286322 |
| NUP153       | -1.696609562 | 5.315563288 | 1.03E-25 | 7.57E-25 | 47.713674  |
| GEMIN5       | -1.181168168 | 5.420845721 | 1.03E-25 | 7.58E-25 | 47.7121938 |
| ZBTB48       | -1.204615184 | 6.371119891 | 1.09E-25 | 7.96E-25 | 47.6605708 |
| HENMT1       | -1.339142997 | 6.074493696 | 1.09E-25 | 7.97E-25 | 47.6587157 |
| RFC5         | -1.327486865 | 4.523061641 | 1.09E-25 | 7.98E-25 | 47.6563407 |
| SLC35A3      | -1.959146943 | 4.736118581 | 1.09E-25 | 7.99E-25 | 47.654904  |
| HSPA4        | -1.092257665 | 5.23259005  | 1.10E-25 | 8.01E-25 | 47.6519039 |
| CNN2         | -1.118672999 | 9.356730458 | 1.11E-25 | 8.11E-25 | 47.6382923 |
| MLC1         | -1.271764094 | 5.37772506  | 1.14E-25 | 8.30E-25 | 47.6149259 |
| ATP6V0E2     | -1.212620291 | 6.813545833 | 1.14E-25 | 8.33E-25 | 47.6101134 |
| FAM172A      | -1.240008341 | 4.999648972 | 1.15E-25 | 8.39E-25 | 47.6030079 |
| GPR162       | 1.232126267  | 5.604410945 | 1.16E-25 | 8.41E-25 | 47.6006323 |
| TMEM55A      | -3.028904993 | 4.020446216 | 1.16E-25 | 8.44E-25 | 47.5970362 |
| HSCB         | -1.435407055 | 4.957086735 | 1.17E-25 | 8.50E-25 | 47.5892656 |
| DPF2         | -1.408491903 | 7.638737866 | 1.20E-25 | 8.70E-25 | 47.5646367 |
| C2orf40      | -1.260871105 | 4.015323528 | 1.20E-25 | 8.70E-25 | 47.564487  |
| ORMDL1       | -1.607269818 | 5.385289461 | 1.22E-25 | 8.86E-25 | 47.5455157 |
| LUC7L2       | -1.337627158 | 6.144194851 | 1.23E-25 | 8.89E-25 | 47.5415221 |
| ACN9         | -1.270440274 | 2.780935878 | 1.24E-25 | 8.98E-25 | 47.5300842 |
| BD495725     | -1.605214311 | 6.059197871 | 1.26E-25 | 9.12E-25 | 47.5134888 |
| ASCC1        | -1.138098335 | 5.064200025 | 1.26E-25 | 9.15E-25 | 47.5099282 |
| YTHDF1       | -1.023915664 | 7.390048999 | 1.29E-25 | 9.32E-25 | 47.4899231 |
| ATG12        | -1.101546458 | 5.814846791 | 1.30E-25 | 9.41E-25 | 47.4803355 |
| PPP1R35      | -1.214488873 | 6.412430547 | 1.33E-25 | 9.62E-25 | 47.4574996 |
| RP1-193H18.2 | -1.305601933 | 4.613828618 | 1.40E-25 | 1.01E-24 | 47.408056  |
| MDH2         | -1.101885567 | 6.832390375 | 1.42E-25 | 1.02E-24 | 47.3971348 |
| CDV3         | -1.251259371 | 6.271860359 | 1.42E-25 | 1.02E-24 | 47.3953671 |
| ZSWIM7       | -1.005232501 | 4.87159383  | 1.42E-25 | 1.02E-24 | 47.391244  |
| MICALL1      | -1.259706345 | 5.918582749 | 1.44E-25 | 1.03E-24 | 47.3808218 |
| THEMIS       | -2.443242962 | 3.780871544 | 1.48E-25 | 1.06E-24 | 47.3542486 |
| RIOK1        | -1.825276354 | 4.628106214 | 1.48E-25 | 1.06E-24 | 47.3532855 |
| MDM1         | -1.575746255 | 3.234387956 | 1.50E-25 | 1.07E-24 | 47.3423816 |
| MFSD6        | -1.40298868  | 4.241931779 | 1.50E-25 | 1.07E-24 | 47.3421956 |
| PRNP         | -2.288409036 | 5.197010936 | 1.50E-25 | 1.08E-24 | 47.3374487 |
| ATXN1L       | -1.407032284 | 6.198055235 | 1.51E-25 | 1.08E-24 | 47.3353559 |
| KIAA0040     | -1.053483358 | 6.71603705  | 1.53E-25 | 1.09E-24 | 47.3211655 |
| ALG13        | -1.56886449  | 4.292540989 | 1.54E-25 | 1.10E-24 | 47.3116323 |
| SNRNP48      | -1.162254269 | 4.03058806  | 1.63E-25 | 1.16E-24 | 47.2565379 |
| ZNF654       | -1.476389577 | 3.586997762 | 1.63E-25 | 1.16E-24 | 47.2547525 |
| NCEH1        | -1.193629929 | 2.775858797 | 1.64E-25 | 1.17E-24 | 47.2525563 |
| SLC9A3R1     | -1.004403743 | 8.141105617 | 1.69E-25 | 1.21E-24 | 47.21822   |
| ABHD16B      | 1.083026183  | 4.660426047 | 1.70E-25 | 1.21E-24 | 47.2150939 |
| TBCC         | -1.080074601 | 7.530739752 | 1.70E-25 | 1.21E-24 | 47.2132037 |

|              |              |             |          |          |            |
|--------------|--------------|-------------|----------|----------|------------|
| GATA3        | -1.260710643 | 5.375095945 | 1.78E-25 | 1.26E-24 | 47.1687489 |
| REV3L        | -1.866356354 | 5.311050292 | 1.84E-25 | 1.31E-24 | 47.1352944 |
| MVB12A       | -1.369697287 | 5.041117806 | 1.93E-25 | 1.36E-24 | 47.0893154 |
| PPIL1        | -1.482811171 | 4.123758114 | 1.95E-25 | 1.38E-24 | 47.0753825 |
| CD7          | -1.628088842 | 6.171589278 | 1.96E-25 | 1.38E-24 | 47.0737819 |
| PTPN12       | -1.559565275 | 4.206217179 | 1.99E-25 | 1.41E-24 | 47.0563058 |
| MIER1        | -1.388305028 | 4.58300692  | 2.01E-25 | 1.42E-24 | 47.0458892 |
| NXPE3        | -1.270764055 | 4.702677577 | 2.01E-25 | 1.42E-24 | 47.0445546 |
| DIP2B        | -1.337026718 | 5.397427544 | 2.02E-25 | 1.43E-24 | 47.0423742 |
| CRYGC        | 1.187568141  | 4.762514065 | 2.21E-25 | 1.56E-24 | 46.9499094 |
| ABHD10       | -1.18063699  | 5.516820271 | 2.32E-25 | 1.63E-24 | 46.9034996 |
| MYBL2        | 1.053565804  | 6.825817471 | 2.42E-25 | 1.69E-24 | 46.8619231 |
| TCF7         | -1.47789566  | 7.710960083 | 2.63E-25 | 1.84E-24 | 46.7752693 |
| RNF144B      | -1.118835988 | 5.971442692 | 2.68E-25 | 1.87E-24 | 46.7596397 |
| DNAJC10      | -1.342814898 | 3.772523594 | 2.68E-25 | 1.87E-24 | 46.7571911 |
| SEC23B       | -1.50045345  | 5.910765977 | 2.69E-25 | 1.88E-24 | 46.7544042 |
| FAM117B      | -1.177791236 | 4.917457535 | 2.70E-25 | 1.88E-24 | 46.7518135 |
| IBTK         | -1.620507791 | 3.533021076 | 2.73E-25 | 1.90E-24 | 46.7402824 |
| GSPT2        | -1.871214309 | 4.540595111 | 2.80E-25 | 1.95E-24 | 46.71518   |
| DERL1        | -1.152123821 | 6.177215392 | 2.83E-25 | 1.97E-24 | 46.7049327 |
| LHFPL3-AS2   | -1.150899186 | 5.117916958 | 2.85E-25 | 1.98E-24 | 46.6962896 |
| EIF3M        | -1.005835541 | 5.152549453 | 2.91E-25 | 2.02E-24 | 46.6769426 |
| ZNF805       | -1.116520256 | 4.186525039 | 3.01E-25 | 2.09E-24 | 46.6405641 |
| C1orf174     | -1.395411073 | 5.00107738  | 3.02E-25 | 2.10E-24 | 46.6381553 |
| SNN          | -1.097732939 | 7.430394785 | 3.04E-25 | 2.11E-24 | 46.6331264 |
| ELF2         | -1.264741536 | 5.85007094  | 3.10E-25 | 2.15E-24 | 46.6118257 |
| PKD2L1       | 1.077705655  | 6.269787429 | 3.18E-25 | 2.20E-24 | 46.587745  |
| RLF          | -1.46290305  | 4.649073845 | 3.39E-25 | 2.34E-24 | 46.5238486 |
| FERMT3       | -1.083189452 | 8.264972948 | 3.48E-25 | 2.40E-24 | 46.4965583 |
| FAM3C        | -1.208781701 | 2.988268316 | 3.57E-25 | 2.46E-24 | 46.4705968 |
| ATMIN        | -1.068980451 | 5.475202287 | 3.60E-25 | 2.48E-24 | 46.4624066 |
| NONO         | -1.357035604 | 8.007454972 | 3.62E-25 | 2.49E-24 | 46.456553  |
| GTF2E1       | -1.548573751 | 4.781104186 | 3.74E-25 | 2.57E-24 | 46.4253338 |
| ZFYVE26      | -1.046650274 | 5.823544166 | 3.79E-25 | 2.61E-24 | 46.4103555 |
| KBTBD8       | -1.323859331 | 3.211576111 | 3.79E-25 | 2.61E-24 | 46.4101365 |
| C11orf54     | -1.351397703 | 5.534315771 | 3.80E-25 | 2.61E-24 | 46.4073127 |
| RAP1GAP2     | -1.400572753 | 7.815251926 | 3.88E-25 | 2.66E-24 | 46.3867356 |
| ALPL         | -2.035847726 | 5.526250016 | 4.01E-25 | 2.75E-24 | 46.3532066 |
| TRMT1L       | -1.61603362  | 3.688059095 | 4.15E-25 | 2.84E-24 | 46.3199523 |
| DPAGT1       | -1.309255633 | 5.577167571 | 4.22E-25 | 2.89E-24 | 46.3024178 |
| FAM160A2     | -1.050159507 | 6.351357565 | 4.36E-25 | 2.98E-24 | 46.2700798 |
| STRBP        | -1.202463899 | 4.624126727 | 4.41E-25 | 3.01E-24 | 46.2594593 |
| SLC35A4      | -1.137442817 | 7.3390044   | 4.42E-25 | 3.01E-24 | 46.2574031 |
| CELA1        | -1.047788192 | 5.175695173 | 4.42E-25 | 3.01E-24 | 46.2568624 |
| NUCB2        | -1.282507467 | 4.541360009 | 4.42E-25 | 3.01E-24 | 46.2567325 |
| TGIF2        | -1.171191077 | 5.442211792 | 4.58E-25 | 3.12E-24 | 46.2216284 |
| LOC150051    | -1.055424305 | 4.14686874  | 4.80E-25 | 3.26E-24 | 46.1743846 |
| CTC-428G20.3 | -1.778146644 | 4.398231936 | 4.87E-25 | 3.31E-24 | 46.1599218 |
| ZNF689       | -1.029250749 | 5.955544908 | 4.95E-25 | 3.36E-24 | 46.1428481 |
| SMAD7        | -1.822523139 | 4.810129197 | 4.98E-25 | 3.38E-24 | 46.1367623 |
| LOC100506302 | -1.079140245 | 5.327998682 | 5.00E-25 | 3.39E-24 | 46.1336236 |
| RAB22A       | -1.518388686 | 5.282757702 | 5.09E-25 | 3.45E-24 | 46.1164662 |
| DNAJB9       | -1.485450092 | 3.847675534 | 5.12E-25 | 3.47E-24 | 46.1093717 |
| RNF169       | -1.127002518 | 6.257810057 | 5.37E-25 | 3.63E-24 | 46.0618083 |
| SNX30        | -1.935570389 | 4.653389427 | 5.39E-25 | 3.65E-24 | 46.0573213 |
| JAKMIP1      | -1.082554022 | 4.276275309 | 5.51E-25 | 3.72E-24 | 46.0362263 |
| IMP4         | -1.112373974 | 6.834292156 | 5.54E-25 | 3.74E-24 | 46.030746  |
| NKRF         | -1.06353335  | 4.989480631 | 5.76E-25 | 3.88E-24 | 45.9922654 |

|               |              |             |          |          |            |
|---------------|--------------|-------------|----------|----------|------------|
| NOV           | -1.299499065 | 5.065186104 | 6.24E-25 | 4.20E-24 | 45.9119155 |
| HIPK3         | -1.228206943 | 4.800354226 | 6.30E-25 | 4.24E-24 | 45.9023153 |
| KLHL5         | -1.454740826 | 4.375139622 | 6.33E-25 | 4.25E-24 | 45.8974077 |
| SLC38A9       | -1.321638033 | 4.61987627  | 6.34E-25 | 4.26E-24 | 45.8959894 |
| PAIP1         | -1.371366343 | 4.244044598 | 6.40E-25 | 4.29E-24 | 45.8868623 |
| KLHL15        | -2.137517539 | 4.328162847 | 6.41E-25 | 4.30E-24 | 45.8847377 |
| EPHX2         | -1.178406737 | 4.659202578 | 6.56E-25 | 4.39E-24 | 45.8620109 |
| KCNK6         | -1.265697272 | 6.809025923 | 6.61E-25 | 4.42E-24 | 45.8537748 |
| C1GALT1C1     | -1.331800634 | 4.169432237 | 6.91E-25 | 4.62E-24 | 45.8096671 |
| PPP1R8        | -1.712952323 | 6.945274391 | 7.03E-25 | 4.69E-24 | 45.7926653 |
| AOC2          | -1.176308595 | 4.885298253 | 7.30E-25 | 4.87E-24 | 45.7539498 |
| AIMP1         | -1.562831408 | 4.391885127 | 7.34E-25 | 4.89E-24 | 45.7489799 |
| STK10         | -1.256501041 | 8.046095973 | 7.59E-25 | 5.05E-24 | 45.7158577 |
| HYLS1         | -1.046793912 | 5.55944172  | 7.96E-25 | 5.29E-24 | 45.6679866 |
| PLRG1         | -1.13870703  | 4.94491554  | 8.15E-25 | 5.41E-24 | 45.6434591 |
| NMRK1         | -1.652789477 | 4.976685882 | 8.32E-25 | 5.51E-24 | 45.6238311 |
| NAPG          | -1.282446483 | 3.858834707 | 8.41E-25 | 5.57E-24 | 45.6131289 |
| JOSD1         | -1.019086366 | 7.090720922 | 8.80E-25 | 5.82E-24 | 45.5671986 |
| GNS           | -1.153706648 | 7.391104978 | 9.24E-25 | 6.10E-24 | 45.5184612 |
| TP53          | -1.117344565 | 5.105600948 | 9.28E-25 | 6.13E-24 | 45.5135917 |
| ASCC3         | -1.017224558 | 3.780549363 | 9.76E-25 | 6.43E-24 | 45.463494  |
| NUPL1         | -1.118059157 | 4.990463255 | 9.89E-25 | 6.51E-24 | 45.4504735 |
| FAM98B        | -1.005647779 | 3.755069568 | 1.01E-24 | 6.63E-24 | 45.4313771 |
| BTBD11        | -1.158048694 | 4.675629573 | 1.01E-24 | 6.66E-24 | 45.4259158 |
| APPL1         | -1.771409565 | 4.766978311 | 1.02E-24 | 6.70E-24 | 45.4198805 |
| SF3B4         | -1.0490647   | 7.866923708 | 1.04E-24 | 6.82E-24 | 45.400329  |
| MRPL49        | -1.036556854 | 7.435682834 | 1.06E-24 | 6.93E-24 | 45.3841583 |
| LOC440434     | -1.046788123 | 6.988263082 | 1.06E-24 | 6.94E-24 | 45.3826466 |
| GRHPR         | -1.00585912  | 6.708829389 | 1.08E-24 | 7.06E-24 | 45.3650063 |
| SAC3D1        | -1.337775107 | 4.998937185 | 1.11E-24 | 7.24E-24 | 45.3378674 |
| FCRLB         | -1.02080781  | 4.208282836 | 1.17E-24 | 7.64E-24 | 45.2824334 |
| PRRC1         | -1.368204784 | 6.00269443  | 1.17E-24 | 7.65E-24 | 45.2808592 |
| DKK4          | 1.011690761  | 4.405935735 | 1.18E-24 | 7.71E-24 | 45.2722803 |
| RBBP4         | -1.468473169 | 6.204168382 | 1.18E-24 | 7.72E-24 | 45.2707195 |
| NME8          | -1.431576628 | 4.184115126 | 1.20E-24 | 7.83E-24 | 45.2552534 |
| WDR47         | -2.159366006 | 4.521833105 | 1.20E-24 | 7.85E-24 | 45.2527617 |
| ZNF426        | -1.340376634 | 4.256651887 | 1.20E-24 | 7.85E-24 | 45.2525104 |
| PELI2         | -1.119942837 | 5.437091099 | 1.22E-24 | 7.93E-24 | 45.2425811 |
| STARD4        | -1.072606844 | 3.701186565 | 1.27E-24 | 8.25E-24 | 45.2017664 |
| PRMT3         | -1.581555817 | 3.501139236 | 1.34E-24 | 8.71E-24 | 45.1457401 |
| KCTD18        | -1.251737432 | 5.461919849 | 1.35E-24 | 8.75E-24 | 45.1407317 |
| CPOX          | -2.227138686 | 3.957393469 | 1.37E-24 | 8.91E-24 | 45.1219791 |
| COMMD10       | -1.272159503 | 3.923995018 | 1.42E-24 | 9.24E-24 | 45.0848118 |
| OTUD6B        | -2.129875013 | 3.492372879 | 1.45E-24 | 9.40E-24 | 45.0665959 |
| AEBP2         | -1.223754252 | 2.95214462  | 1.46E-24 | 9.47E-24 | 45.0582038 |
| MAML1         | -1.517163017 | 7.550798073 | 1.48E-24 | 9.57E-24 | 45.0467563 |
| EGFLAM        | -1.065144632 | 4.236491476 | 1.51E-24 | 9.77E-24 | 45.0247238 |
| RAB30-AS1     | -1.54521821  | 4.839685693 | 1.58E-24 | 1.02E-23 | 44.9839174 |
| NT5C2         | -1.318315328 | 8.665305794 | 1.62E-24 | 1.04E-23 | 44.9559152 |
| LOC153577     | -1.302219311 | 3.855038657 | 1.63E-24 | 1.05E-23 | 44.9500923 |
| CTC-444N24.11 | -1.836693238 | 4.60306132  | 1.64E-24 | 1.05E-23 | 44.9459488 |
| DPYD          | -1.221284574 | 4.661234217 | 1.74E-24 | 1.11E-23 | 44.8869374 |
| ZCCHC8        | -1.468425975 | 4.880250677 | 1.74E-24 | 1.12E-23 | 44.8846546 |
| GORAB         | -1.376160235 | 2.902001926 | 1.84E-24 | 1.18E-23 | 44.8305743 |
| SAMD3         | -1.005254052 | 4.601216805 | 1.85E-24 | 1.18E-23 | 44.824548  |
| NOC2L         | -1.17838093  | 5.332185014 | 1.87E-24 | 1.20E-23 | 44.8109889 |
| OVGP1         | -1.004069463 | 5.781277507 | 1.95E-24 | 1.25E-23 | 44.77106   |
| C4orf32       | -1.374086905 | 4.269002169 | 1.95E-24 | 1.25E-23 | 44.7697853 |

|              |              |             |          |          |            |
|--------------|--------------|-------------|----------|----------|------------|
| AK3          | -1.995788275 | 5.478767932 | 2.02E-24 | 1.29E-23 | 44.732989  |
| INSIG2       | -1.669990028 | 3.653047994 | 2.08E-24 | 1.33E-23 | 44.7040282 |
| CLEC2D       | -1.667977496 | 4.586752064 | 2.19E-24 | 1.40E-23 | 44.6531244 |
| GNB4         | -1.502495912 | 5.847105466 | 2.20E-24 | 1.40E-23 | 44.6514138 |
| NAA35        | -1.17132605  | 5.022150549 | 2.30E-24 | 1.46E-23 | 44.6053922 |
| TBX21        | -1.461473952 | 6.64220489  | 2.30E-24 | 1.46E-23 | 44.6033229 |
| OMA1         | -2.087776878 | 4.680404523 | 2.35E-24 | 1.49E-23 | 44.5834543 |
| SLC25A32     | -1.978408929 | 4.424555803 | 2.36E-24 | 1.50E-23 | 44.5788293 |
| TACC3        | -1.353486767 | 7.032053341 | 2.38E-24 | 1.51E-23 | 44.5711467 |
| RBM3         | -1.490203965 | 5.488630727 | 2.39E-24 | 1.52E-23 | 44.5657871 |
| SMAD2        | -1.127721233 | 5.50000823  | 2.50E-24 | 1.58E-23 | 44.5235101 |
| SLC35A5      | -2.22494673  | 4.658704931 | 2.51E-24 | 1.59E-23 | 44.5173602 |
| TNFAIP3      | -1.336461602 | 7.498096802 | 2.63E-24 | 1.66E-23 | 44.4692875 |
| WDR45B       | -1.823549051 | 7.371506267 | 2.68E-24 | 1.69E-23 | 44.4530822 |
| MTF2         | -1.439428104 | 5.222283989 | 2.72E-24 | 1.72E-23 | 44.4357445 |
| C2orf42      | -1.235835641 | 5.616675777 | 2.87E-24 | 1.81E-23 | 44.382565  |
| MED4         | -1.766582806 | 3.776959681 | 2.97E-24 | 1.86E-23 | 44.3496404 |
| PPWD1        | -1.501075189 | 3.667364807 | 2.98E-24 | 1.87E-23 | 44.3454312 |
| THUMPD3-AS1  | -1.02604415  | 4.990822936 | 2.99E-24 | 1.87E-23 | 44.3435465 |
| GTF2H3       | -1.269716888 | 5.270037431 | 3.00E-24 | 1.88E-23 | 44.3381684 |
| TOX2         | -1.27549662  | 2.954457803 | 3.04E-24 | 1.91E-23 | 44.3244403 |
| PRPF38B      | -1.304923464 | 7.004627174 | 3.13E-24 | 1.96E-23 | 44.2973155 |
| DANCR        | -1.283244788 | 6.247394223 | 3.18E-24 | 1.99E-23 | 44.2802041 |
| MPHOSPH10    | -1.291861673 | 5.25178192  | 3.30E-24 | 2.06E-23 | 44.2448519 |
| BUB3         | -1.189021826 | 5.519476874 | 3.30E-24 | 2.06E-23 | 44.2435941 |
| NUAK1        | -1.017164251 | 3.982585117 | 3.35E-24 | 2.09E-23 | 44.2299058 |
| ZNF420       | -1.306063583 | 4.069194801 | 3.38E-24 | 2.11E-23 | 44.2187367 |
| CUL4B        | -1.422758888 | 5.525108042 | 3.46E-24 | 2.16E-23 | 44.1972906 |
| UBE2K        | -1.104184341 | 6.238680933 | 3.46E-24 | 2.16E-23 | 44.1960078 |
| PANK3        | -1.572930579 | 4.190674599 | 3.56E-24 | 2.22E-23 | 44.1674644 |
| TMED5        | -1.225126696 | 4.384010827 | 3.60E-24 | 2.24E-23 | 44.1573613 |
| ZBTB44       | -1.489657665 | 5.740758522 | 3.64E-24 | 2.26E-23 | 44.1463659 |
| KIAA0754     | -1.323345042 | 4.78780625  | 3.67E-24 | 2.28E-23 | 44.1380891 |
| NPAT         | -1.051516196 | 4.928842173 | 3.95E-24 | 2.45E-23 | 44.0640888 |
| UAP1         | -1.911313932 | 3.758273859 | 4.02E-24 | 2.49E-23 | 44.0450242 |
| SIGLEC17P    | -1.707438193 | 5.664961041 | 4.11E-24 | 2.54E-23 | 44.0244711 |
| CXorf38      | -1.522644145 | 6.569156623 | 4.23E-24 | 2.61E-23 | 43.9958481 |
| SLC30A7      | -1.33127091  | 5.444409945 | 4.24E-24 | 2.62E-23 | 43.9924938 |
| HPGD         | -1.064109283 | 3.366458642 | 4.26E-24 | 2.63E-23 | 43.9873996 |
| RNF4         | -1.581104599 | 7.993621178 | 4.47E-24 | 2.76E-23 | 43.9391802 |
| KLHL7        | -1.40819264  | 3.984835725 | 4.49E-24 | 2.77E-23 | 43.9361452 |
| ZMYM4        | -1.324152793 | 5.035726356 | 4.51E-24 | 2.78E-23 | 43.9299612 |
| CNOT7        | -1.67362913  | 6.313598953 | 4.59E-24 | 2.83E-23 | 43.9127404 |
| FOS          | -2.370205661 | 6.206789123 | 4.64E-24 | 2.86E-23 | 43.9019866 |
| NHSL2        | -1.080059289 | 5.199760048 | 4.66E-24 | 2.87E-23 | 43.8975614 |
| EED          | -1.439421831 | 4.286761338 | 4.69E-24 | 2.89E-23 | 43.8919404 |
| ATG101       | -1.195672304 | 5.511482785 | 4.74E-24 | 2.92E-23 | 43.8803057 |
| CTCF         | -1.586160748 | 7.030621283 | 4.82E-24 | 2.96E-23 | 43.8646127 |
| PDK4         | -1.435087741 | 4.042817126 | 4.87E-24 | 3.00E-23 | 43.8533667 |
| CASP8        | -1.118817544 | 6.532848829 | 4.95E-24 | 3.04E-23 | 43.8369991 |
| LOC102724967 | 1.008313235  | 6.448742732 | 5.08E-24 | 3.12E-23 | 43.8118922 |
| CYB561A3     | -1.086512685 | 7.237403683 | 5.09E-24 | 3.12E-23 | 43.8092724 |
| MTMR12       | -1.227140891 | 5.080688049 | 5.43E-24 | 3.33E-23 | 43.744763  |
| ARFIP1       | -1.661429724 | 4.771541057 | 5.65E-24 | 3.46E-23 | 43.7049862 |
| LACTB        | -1.579857992 | 5.159496676 | 6.10E-24 | 3.72E-23 | 43.6290297 |
| LOC646214    | -1.199319409 | 5.812977336 | 6.43E-24 | 3.91E-23 | 43.5761194 |
| CEP120       | -1.146247225 | 3.874710911 | 6.45E-24 | 3.92E-23 | 43.5721406 |
| SELPLG       | -1.019384119 | 8.487158554 | 6.51E-24 | 3.95E-23 | 43.5635429 |

|              |              |             |          |          |            |
|--------------|--------------|-------------|----------|----------|------------|
| FCRLA        | -1.336979145 | 4.284001815 | 6.56E-24 | 3.98E-23 | 43.5559253 |
| RSAD1        | -1.056572632 | 6.799289132 | 6.63E-24 | 4.02E-23 | 43.5451559 |
| CHFR         | -1.003506754 | 6.893686811 | 6.66E-24 | 4.04E-23 | 43.5406677 |
| ACADM        | -2.651199612 | 4.482499203 | 6.83E-24 | 4.14E-23 | 43.5158411 |
| PPIF         | -1.32772823  | 7.009031767 | 6.95E-24 | 4.21E-23 | 43.4976081 |
| ORAI1        | -1.188348011 | 7.681315052 | 7.32E-24 | 4.43E-23 | 43.4456953 |
| SFR1         | -1.061175906 | 3.839118226 | 7.38E-24 | 4.46E-23 | 43.4376884 |
| SREK1IP1     | -1.501957693 | 4.4694214   | 7.56E-24 | 4.57E-23 | 43.4128022 |
| TTC37        | -1.553677501 | 4.481864724 | 7.66E-24 | 4.63E-23 | 43.4001464 |
| LINC01270    | -1.05368891  | 4.128436536 | 7.68E-24 | 4.64E-23 | 43.3970451 |
| NGF          | 1.018333169  | 6.136084385 | 7.97E-24 | 4.81E-23 | 43.3600017 |
| NNT-AS1      | -1.531233191 | 3.746732253 | 8.05E-24 | 4.86E-23 | 43.3500216 |
| AC016831.7   | -1.014058115 | 3.689250702 | 8.10E-24 | 4.88E-23 | 43.3440041 |
| SLC25A47     | 1.060695088  | 5.205053536 | 8.18E-24 | 4.93E-23 | 43.3346796 |
| PCNX         | -1.166201163 | 4.616825629 | 8.27E-24 | 4.98E-23 | 43.3240305 |
| NUPL2        | -1.178316232 | 5.3422701   | 8.29E-24 | 4.99E-23 | 43.3210446 |
| FAM49A       | -1.205418246 | 6.613804816 | 8.34E-24 | 5.01E-23 | 43.3155675 |
| RP11-389C8.2 | -1.023830935 | 3.686963032 | 8.40E-24 | 5.05E-23 | 43.3079843 |
| RABGAP1      | -1.037849298 | 6.903154549 | 8.41E-24 | 5.05E-23 | 43.3072564 |
| CRTC3        | -1.564791665 | 6.068053428 | 8.50E-24 | 5.11E-23 | 43.2958515 |
| MTCH2        | -1.058258493 | 6.201543392 | 8.66E-24 | 5.20E-23 | 43.2774412 |
| SNX14        | -1.64714366  | 4.159521079 | 8.96E-24 | 5.37E-23 | 43.2430253 |
| GABPB2       | -1.355768984 | 5.656678401 | 8.99E-24 | 5.38E-23 | 43.2405139 |
| DUSP28       | -1.152142494 | 6.690596588 | 9.08E-24 | 5.43E-23 | 43.2304351 |
| TRDV3        | -1.486922789 | 4.568809715 | 9.12E-24 | 5.46E-23 | 43.2253924 |
| DDX60L       | -1.734191604 | 5.012022263 | 9.33E-24 | 5.58E-23 | 43.2026205 |
| ZNF587B      | -1.525393477 | 5.417473765 | 9.43E-24 | 5.64E-23 | 43.1918314 |
| PPP6R3       | -1.254857245 | 6.525051681 | 9.56E-24 | 5.71E-23 | 43.1783499 |
| GPR137B      | -1.863550583 | 4.928701569 | 9.60E-24 | 5.73E-23 | 43.1747274 |
| ADCY7        | -1.263945167 | 6.126574749 | 9.94E-24 | 5.93E-23 | 43.1396754 |
| SLC25A40     | -1.857718364 | 4.042965362 | 1.05E-23 | 6.25E-23 | 43.0863527 |
| CRYZ         | -1.752929572 | 3.868783629 | 1.06E-23 | 6.31E-23 | 43.0770023 |
| BEND2        | -1.702624121 | 4.71207184  | 1.10E-23 | 6.55E-23 | 43.0374266 |
| HERC2        | -1.310148407 | 4.05771655  | 1.12E-23 | 6.63E-23 | 43.0243621 |
| RBM23        | -1.361667675 | 7.96452021  | 1.14E-23 | 6.79E-23 | 43.0005205 |
| CDK4         | -1.045981157 | 6.830124606 | 1.24E-23 | 7.38E-23 | 42.9140952 |
| C16orf80     | -1.493948436 | 6.568661676 | 1.26E-23 | 7.48E-23 | 42.8994672 |
| KLHL6        | -1.031632615 | 4.996068237 | 1.27E-23 | 7.53E-23 | 42.8924596 |
| GPR144       | 1.474768515  | 5.365626005 | 1.28E-23 | 7.56E-23 | 42.8884052 |
| ANAPC16      | -1.209485762 | 7.959415318 | 1.28E-23 | 7.57E-23 | 42.8862056 |
| TRAPPC12     | -1.131783778 | 6.359180183 | 1.32E-23 | 7.79E-23 | 42.8561427 |
| USP8         | -1.393000727 | 6.763378655 | 1.34E-23 | 7.93E-23 | 42.8381228 |
| DONSON       | -1.06479766  | 3.539603046 | 1.39E-23 | 8.20E-23 | 42.8038832 |
| TRIM33       | -1.233026381 | 6.456836877 | 1.43E-23 | 8.41E-23 | 42.7771473 |
| CASC4        | -1.174631291 | 5.892791292 | 1.48E-23 | 8.73E-23 | 42.739187  |
| WBP2         | -1.272195994 | 8.424586066 | 1.58E-23 | 9.29E-23 | 42.6755315 |
| TXNDC16      | -1.793046025 | 3.686976848 | 1.67E-23 | 9.77E-23 | 42.6227673 |
| HAUS3        | -1.631428437 | 4.015824221 | 1.73E-23 | 1.01E-22 | 42.5846281 |
| PHKB         | -1.300573509 | 5.200045838 | 1.75E-23 | 1.02E-22 | 42.573434  |
| CCDC6        | -1.435588778 | 5.111861612 | 1.75E-23 | 1.03E-22 | 42.5707157 |
| FLVCR1       | -1.92495989  | 4.746006473 | 1.76E-23 | 1.03E-22 | 42.5689912 |
| GRPEL1       | -1.07237286  | 6.471467394 | 1.76E-23 | 1.03E-22 | 42.568568  |
| SRI          | -1.156548506 | 5.582429834 | 1.78E-23 | 1.04E-22 | 42.5581799 |
| LBH          | -1.913647623 | 7.619307634 | 1.80E-23 | 1.05E-22 | 42.5429816 |
| BEX4         | -1.498862319 | 4.32752251  | 1.81E-23 | 1.05E-22 | 42.5419606 |
| IL15         | -1.341978374 | 3.125346019 | 1.82E-23 | 1.06E-22 | 42.5355071 |
| DCTN4        | -1.236809141 | 4.809050937 | 1.83E-23 | 1.07E-22 | 42.5285588 |
| ZNF566       | -1.000246079 | 2.816597639 | 1.98E-23 | 1.15E-22 | 42.4518027 |



|              |              |             |          |          |            |
|--------------|--------------|-------------|----------|----------|------------|
| C12orf5      | -1.713204682 | 4.931326891 | 1.98E-23 | 1.15E-22 | 42.4503662 |
| RP11-554J4.1 | -1.47511983  | 4.268511526 | 1.98E-23 | 1.15E-22 | 42.448822  |
| RAB33A       | -1.114188267 | 5.139914916 | 1.98E-23 | 1.15E-22 | 42.4478509 |
| RCAN3        | -1.647087101 | 5.241578658 | 1.98E-23 | 1.15E-22 | 42.446882  |
| FAM214A      | -1.699713412 | 4.579164733 | 2.05E-23 | 1.19E-22 | 42.4141826 |
| USP25        | -1.146310611 | 4.448217637 | 2.12E-23 | 1.22E-22 | 42.3829364 |
| SPPL2A       | -1.716470239 | 5.724500321 | 2.14E-23 | 1.24E-22 | 42.3712794 |
| DDB2         | -1.009285818 | 5.950283324 | 2.15E-23 | 1.24E-22 | 42.3655174 |
| CDC123       | -1.247294858 | 6.73225621  | 2.17E-23 | 1.25E-22 | 42.357099  |
| OGT          | -1.77597811  | 5.914009407 | 2.18E-23 | 1.26E-22 | 42.3520075 |
| SNX13        | -1.261258879 | 3.772836274 | 2.21E-23 | 1.28E-22 | 42.3381158 |
| HPSE         | -1.403837449 | 5.640979269 | 2.34E-23 | 1.35E-22 | 42.2810197 |
| GINM1        | -1.266328354 | 6.670239757 | 2.36E-23 | 1.36E-22 | 42.2738829 |
| PCDHB12      | 1.157203888  | 4.119394265 | 2.40E-23 | 1.38E-22 | 42.258361  |
| PMS2P8       | -1.41631737  | 5.415321371 | 2.47E-23 | 1.42E-22 | 42.2280181 |
| BTG2         | -1.120579907 | 7.126784217 | 2.52E-23 | 1.45E-22 | 42.2074409 |
| SWAP70       | -1.644410693 | 4.865637884 | 2.53E-23 | 1.45E-22 | 42.2031924 |
| BIRC6        | -2.021740437 | 5.703365323 | 2.56E-23 | 1.47E-22 | 42.1915688 |
| PIGF         | -1.620708995 | 5.002875119 | 2.57E-23 | 1.47E-22 | 42.1866486 |
| EFTUD1       | -1.030022399 | 5.221534052 | 2.61E-23 | 1.49E-22 | 42.1737433 |
| CXorf23      | -1.151084835 | 2.829006079 | 2.65E-23 | 1.51E-22 | 42.1572845 |
| LOC202025    | -2.178931233 | 5.258872601 | 2.66E-23 | 1.52E-22 | 42.1541821 |
| ZNF587       | -1.551703838 | 6.533400295 | 2.70E-23 | 1.54E-22 | 42.1396664 |
| CCDC115      | -1.506642084 | 6.915073199 | 2.74E-23 | 1.56E-22 | 42.1245505 |
| CYLD         | -1.183717702 | 5.655210104 | 2.76E-23 | 1.57E-22 | 42.1175273 |
| ZFP62        | -1.838639774 | 4.023886604 | 2.84E-23 | 1.62E-22 | 42.0892746 |
| CALHM2       | -1.090649986 | 7.133093601 | 2.88E-23 | 1.64E-22 | 42.0742792 |
| SLMO2        | -1.364077161 | 4.976280809 | 2.98E-23 | 1.70E-22 | 42.0397709 |
| RPGR         | -1.126025242 | 3.20233494  | 3.04E-23 | 1.73E-22 | 42.0208639 |
| CRYBG3       | -1.138509594 | 4.874613151 | 3.06E-23 | 1.74E-22 | 42.013153  |
| ILKAP        | -1.060852398 | 5.621478631 | 3.08E-23 | 1.75E-22 | 42.0063464 |
| AC007401.2   | -1.416649051 | 4.194588922 | 3.17E-23 | 1.80E-22 | 41.978263  |
| TYW1         | -1.06429251  | 5.59015873  | 3.20E-23 | 1.82E-22 | 41.9687209 |
| POC5         | -1.025503497 | 5.048620368 | 3.22E-23 | 1.82E-22 | 41.964022  |
| ANP32A       | -1.203583726 | 6.581377355 | 3.25E-23 | 1.84E-22 | 41.9543846 |
| KIAA0196     | -1.073195142 | 5.942692368 | 3.27E-23 | 1.85E-22 | 41.9469117 |
| CHIC2        | -1.837207635 | 6.910648668 | 3.31E-23 | 1.87E-22 | 41.9359597 |
| CCDC47       | -1.415808966 | 4.723797124 | 3.35E-23 | 1.90E-22 | 41.9220585 |
| USP9X        | -1.214476078 | 6.674302043 | 3.53E-23 | 1.99E-22 | 41.8716877 |
| STX12        | -1.332168721 | 6.417069209 | 3.53E-23 | 1.99E-22 | 41.8711211 |
| KPNA1        | -1.145666021 | 5.881235955 | 3.53E-23 | 1.99E-22 | 41.8697589 |
| ZBTB11       | -2.178207494 | 4.471022333 | 3.53E-23 | 1.99E-22 | 41.8693876 |
| PTPN4        | -1.136388872 | 4.562999507 | 3.75E-23 | 2.11E-22 | 41.8086813 |
| TMPO         | -1.266293295 | 4.692652761 | 3.77E-23 | 2.12E-22 | 41.8054049 |
| ZHX1         | -1.234883207 | 3.480905949 | 3.77E-23 | 2.12E-22 | 41.8036071 |
| PPP1R16B     | -1.180857531 | 6.411460431 | 3.77E-23 | 2.12E-22 | 41.803492  |
| CD19         | -1.22107592  | 5.93060905  | 3.77E-23 | 2.12E-22 | 41.8033473 |
| ZNF518A      | -1.161131885 | 5.175376742 | 4.14E-23 | 2.32E-22 | 41.7104089 |
| NECAP1       | -1.881898415 | 5.79246289  | 4.18E-23 | 2.35E-22 | 41.7005393 |
| ITGAL        | -1.504735301 | 8.042396437 | 4.21E-23 | 2.36E-22 | 41.6933372 |
| SLC26A2      | -1.182138426 | 5.372753442 | 4.41E-23 | 2.47E-22 | 41.6468303 |
| DPH7         | -1.010557784 | 5.43703269  | 4.46E-23 | 2.50E-22 | 41.6359287 |
| HOXB2        | -1.448203167 | 6.62161486  | 4.85E-23 | 2.71E-22 | 41.5514507 |
| ARPC1A       | -1.032236353 | 6.572856062 | 4.95E-23 | 2.76E-22 | 41.5321085 |
| MRPL10       | -1.292890093 | 6.959423234 | 5.05E-23 | 2.82E-22 | 41.5112786 |
| ZNF264       | -1.560663864 | 5.819005763 | 5.12E-23 | 2.86E-22 | 41.4974752 |
| LINS         | -1.20591778  | 5.803120531 | 5.13E-23 | 2.86E-22 | 41.4965334 |
| RHBDF2       | -1.181771001 | 6.484996661 | 5.14E-23 | 2.86E-22 | 41.4951637 |

|               |              |             |          |          |            |
|---------------|--------------|-------------|----------|----------|------------|
| KLHL21        | -1.167083072 | 6.494465691 | 5.15E-23 | 2.87E-22 | 41.4921537 |
| COA5          | -1.445834438 | 5.09427304  | 5.19E-23 | 2.89E-22 | 41.4846337 |
| KIAA0907      | -1.52529023  | 6.24953223  | 5.19E-23 | 2.89E-22 | 41.4846128 |
| LOC153682     | -1.642031981 | 4.141332972 | 5.25E-23 | 2.92E-22 | 41.4733412 |
| ZNF431        | -1.061147662 | 3.913946993 | 5.27E-23 | 2.93E-22 | 41.4686253 |
| C1orf64       | 1.173259119  | 4.922411091 | 5.41E-23 | 3.00E-22 | 41.4438535 |
| PRPF39        | -1.624760295 | 3.660165707 | 5.41E-23 | 3.00E-22 | 41.443467  |
| ATAD1         | -2.034487806 | 4.44428534  | 5.83E-23 | 3.22E-22 | 41.3674413 |
| HEATR5A       | -2.250413768 | 3.928101217 | 5.84E-23 | 3.23E-22 | 41.3666798 |
| NUP43         | -1.100960392 | 5.34747337  | 5.85E-23 | 3.23E-22 | 41.3639394 |
| HAUS6         | -1.188900868 | 2.993909109 | 5.90E-23 | 3.26E-22 | 41.3555489 |
| ANKS1A        | -1.148456316 | 5.987255041 | 5.95E-23 | 3.28E-22 | 41.3485952 |
| PYROXD1       | -1.779228048 | 5.127754651 | 5.98E-23 | 3.30E-22 | 41.3432259 |
| HELB          | -1.25806412  | 5.660057227 | 6.04E-23 | 3.33E-22 | 41.3334126 |
| SIMC1         | -1.362989109 | 5.065433655 | 6.09E-23 | 3.36E-22 | 41.3239287 |
| TAPT1-AS1     | -2.022869877 | 5.679378027 | 6.14E-23 | 3.38E-22 | 41.3160781 |
| TMEM50B       | -1.008326931 | 5.215657095 | 6.26E-23 | 3.45E-22 | 41.2966359 |
| ACD           | -1.186969602 | 5.948102015 | 6.34E-23 | 3.49E-22 | 41.2838978 |
| EIF3A         | -1.544714436 | 6.435655486 | 6.57E-23 | 3.61E-22 | 41.2481118 |
| CCNYL1        | -1.279522671 | 4.154392178 | 6.60E-23 | 3.63E-22 | 41.2437763 |
| YJEFN3        | 1.14510183   | 4.942374128 | 6.62E-23 | 3.63E-22 | 41.2412234 |
| PXYLP1        | -1.188130445 | 4.17707435  | 6.65E-23 | 3.65E-22 | 41.236752  |
| C20orf197     | -1.268646485 | 2.754629915 | 6.82E-23 | 3.74E-22 | 41.211435  |
| SLC18A3       | 1.009923168  | 4.668944911 | 7.03E-23 | 3.85E-22 | 41.1803273 |
| ENOSF1        | -1.159985028 | 5.413588846 | 7.62E-23 | 4.16E-22 | 41.1000758 |
| NSUN2         | -1.10320339  | 6.841774699 | 7.68E-23 | 4.19E-22 | 41.0921052 |
| PRKRA         | -1.35054096  | 5.362657094 | 7.79E-23 | 4.25E-22 | 41.0779496 |
| ARHGAP18      | -1.149517929 | 4.616725178 | 8.07E-23 | 4.40E-22 | 41.0432462 |
| COG5          | -1.314674932 | 5.270226094 | 8.24E-23 | 4.49E-22 | 41.0214265 |
| ERLIN1        | -1.31149001  | 5.53110066  | 8.64E-23 | 4.70E-22 | 40.9741507 |
| ZBTB2         | -1.762034622 | 3.988136992 | 8.79E-23 | 4.78E-22 | 40.9571986 |
| FAM169A       | -1.435176476 | 3.812879358 | 8.84E-23 | 4.80E-22 | 40.9518413 |
| DIS3L         | -1.238831252 | 4.778186428 | 8.88E-23 | 4.82E-22 | 40.9465638 |
| AGPS          | -1.200228339 | 4.19744234  | 8.94E-23 | 4.85E-22 | 40.9397571 |
| UNG           | -1.270396561 | 4.412670399 | 9.21E-23 | 4.99E-22 | 40.9104898 |
| SLFN5         | -1.342557993 | 5.88397554  | 9.44E-23 | 5.11E-22 | 40.8860367 |
| SLC27A3       | -1.408128324 | 6.254627247 | 9.45E-23 | 5.12E-22 | 40.8852148 |
| KAT7          | -1.018178016 | 7.294776405 | 9.53E-23 | 5.16E-22 | 40.8757747 |
| KCNE3         | -1.4213486   | 6.578310035 | 9.63E-23 | 5.22E-22 | 40.8654605 |
| ARFGEF1       | -1.632320168 | 5.993447594 | 9.68E-23 | 5.24E-22 | 40.8607631 |
| PAFAH1B1      | -1.157727732 | 5.984099622 | 1.02E-22 | 5.49E-22 | 40.8124183 |
| RHOQ          | -1.378707209 | 6.899651115 | 1.02E-22 | 5.53E-22 | 40.804184  |
| LA16c-381G6.1 | 1.140799533  | 5.21483304  | 1.04E-22 | 5.59E-22 | 40.7933872 |
| TMEM57        | -1.022360393 | 4.540686369 | 1.06E-22 | 5.69E-22 | 40.7741574 |
| ETNK1         | -1.454502337 | 3.445944575 | 1.08E-22 | 5.80E-22 | 40.7546671 |
| FGR           | -1.437274327 | 8.975653829 | 1.09E-22 | 5.87E-22 | 40.7420482 |
| RBL2          | -1.574207759 | 7.488335325 | 1.10E-22 | 5.90E-22 | 40.7357781 |
| PKIA          | -1.034524333 | 3.876721573 | 1.10E-22 | 5.91E-22 | 40.7347787 |
| RALGPS2       | -1.07257389  | 4.079843333 | 1.10E-22 | 5.91E-22 | 40.7345726 |
| PTPRU         | 1.113285648  | 5.965056851 | 1.11E-22 | 5.96E-22 | 40.7249393 |
| PHF11         | -1.083342489 | 7.574822007 | 1.12E-22 | 6.03E-22 | 40.7127999 |
| SLC9A8        | -1.051697031 | 6.33023477  | 1.13E-22 | 6.06E-22 | 40.7079804 |
| GMCL1         | -2.451516041 | 5.295391029 | 1.18E-22 | 6.34E-22 | 40.6609683 |
| HADHB         | -1.311117552 | 8.228644423 | 1.18E-22 | 6.35E-22 | 40.6588439 |
| PCF11         | -1.083233792 | 6.174804108 | 1.19E-22 | 6.38E-22 | 40.6527554 |
| PCYOX1L       | -1.051086075 | 6.389156161 | 1.21E-22 | 6.46E-22 | 40.6404166 |
| TSPYL4        | -1.891425527 | 5.883409114 | 1.21E-22 | 6.50E-22 | 40.6331679 |
| IMP3          | -1.092890728 | 6.789541435 | 1.25E-22 | 6.67E-22 | 40.6066361 |

|              |              |             |          |          |            |
|--------------|--------------|-------------|----------|----------|------------|
| TBCK         | -1.536239784 | 5.366709818 | 1.26E-22 | 6.73E-22 | 40.5975056 |
| LRIF1        | -2.086535493 | 3.857872122 | 1.26E-22 | 6.74E-22 | 40.5955169 |
| MITD1        | -2.117373859 | 4.992247551 | 1.29E-22 | 6.90E-22 | 40.5702445 |
| MGAT4A       | -1.256972496 | 4.251445968 | 1.29E-22 | 6.91E-22 | 40.5693543 |
| PCSK7        | -1.358791158 | 6.685515685 | 1.30E-22 | 6.91E-22 | 40.5692701 |
| PTGER2       | -1.952013348 | 5.519449917 | 1.32E-22 | 7.04E-22 | 40.5496711 |
| ZAP70        | -1.449559775 | 7.039625383 | 1.37E-22 | 7.30E-22 | 40.5105786 |
| ZNF260       | -1.554056131 | 3.949485125 | 1.39E-22 | 7.37E-22 | 40.5006389 |
| LOC100287497 | -1.290692494 | 4.516223779 | 1.39E-22 | 7.40E-22 | 40.4969387 |
| GPN3         | -1.641274098 | 4.42192228  | 1.42E-22 | 7.56E-22 | 40.4743172 |
| ZNF160       | -1.085237383 | 5.581574904 | 1.45E-22 | 7.71E-22 | 40.455104  |
| CNIH1        | -2.046006438 | 5.314683868 | 1.46E-22 | 7.74E-22 | 40.4501895 |
| SLAMF6       | -1.106704132 | 7.428229943 | 1.48E-22 | 7.82E-22 | 40.4389983 |
| KIAA1598     | -2.063409968 | 4.656885195 | 1.49E-22 | 7.88E-22 | 40.431362  |
| SMARCA5      | -1.936405    | 3.846043571 | 1.50E-22 | 7.93E-22 | 40.4247978 |
| TIMM22       | -1.031510323 | 5.365621874 | 1.50E-22 | 7.97E-22 | 40.4200756 |
| SRRM1        | -1.180858455 | 7.536381702 | 1.52E-22 | 8.03E-22 | 40.4116469 |
| UFM1         | -1.393479181 | 4.380259641 | 1.54E-22 | 8.13E-22 | 40.3984379 |
| LOC728613    | -1.306654864 | 4.646815665 | 1.64E-22 | 8.64E-22 | 40.3348595 |
| CD1D         | -1.946447841 | 5.883821394 | 1.64E-22 | 8.65E-22 | 40.3333801 |
| HNRNPA1      | -1.106077548 | 6.110004848 | 1.64E-22 | 8.65E-22 | 40.3333429 |
| TUFT1        | -1.199385231 | 4.499840467 | 1.67E-22 | 8.79E-22 | 40.3167516 |
| DAB2         | -1.015670258 | 4.052957998 | 1.74E-22 | 9.17E-22 | 40.274042  |
| ZBTB26       | -1.020850512 | 3.563807415 | 1.78E-22 | 9.34E-22 | 40.2534552 |
| BARX1        | 1.113514507  | 4.609825676 | 1.78E-22 | 9.34E-22 | 40.2533591 |
| CHAMP1       | -1.174815809 | 5.92510948  | 1.83E-22 | 9.59E-22 | 40.2254023 |
| LCORL        | -1.644487292 | 4.011983124 | 1.85E-22 | 9.69E-22 | 40.2138913 |
| SRP54        | -1.612128647 | 6.025966096 | 1.85E-22 | 9.70E-22 | 40.213235  |
| MALT1        | -1.776916482 | 4.282638532 | 1.94E-22 | 1.01E-21 | 40.1654375 |
| MTR          | -1.500877712 | 4.605121196 | 1.94E-22 | 1.02E-21 | 40.1629857 |
| GPX3         | -1.103766299 | 4.713978685 | 1.99E-22 | 1.04E-21 | 40.1416404 |
| ERMARD       | -1.213284277 | 5.34985054  | 2.05E-22 | 1.07E-21 | 40.1074021 |
| TOPBP1       | -1.776509793 | 5.609219156 | 2.17E-22 | 1.13E-21 | 40.0522835 |
| CRIPAK       | -1.278552282 | 6.693771391 | 2.23E-22 | 1.16E-21 | 40.0264677 |
| SPTSSA       | -1.407310564 | 4.392206459 | 2.37E-22 | 1.23E-21 | 39.9648873 |
| PWP1         | -1.018254471 | 6.56932103  | 2.42E-22 | 1.25E-21 | 39.9449169 |
| PSMD12       | -1.855619061 | 5.578710286 | 2.44E-22 | 1.27E-21 | 39.9339165 |
| IKZF5        | -1.280989729 | 4.240554471 | 2.53E-22 | 1.31E-21 | 39.9007049 |
| C3orf38      | -1.348130836 | 4.385455099 | 2.53E-22 | 1.31E-21 | 39.8987598 |
| TIA1         | -1.430259392 | 4.951371693 | 2.53E-22 | 1.31E-21 | 39.8979826 |
| CHD2         | -1.082977189 | 5.115040252 | 2.54E-22 | 1.31E-21 | 39.8968406 |
| CAMTA2       | -1.001627276 | 6.924404135 | 2.56E-22 | 1.32E-21 | 39.8885724 |
| PRKD3        | -1.10295998  | 4.546912291 | 2.56E-22 | 1.32E-21 | 39.8879156 |
| NAA16        | -1.656405451 | 4.830130085 | 2.56E-22 | 1.33E-21 | 39.8856944 |
| TAF13        | -1.083016049 | 3.419368771 | 2.64E-22 | 1.36E-21 | 39.8575993 |
| AASDHPPT     | -1.43369444  | 4.152568495 | 2.69E-22 | 1.39E-21 | 39.8373656 |
| LOC100505715 | -1.105131954 | 5.717345672 | 2.69E-22 | 1.39E-21 | 39.8373056 |
| CDK2AP1      | -1.838258384 | 6.829199965 | 2.72E-22 | 1.40E-21 | 39.8271355 |
| EIF2AK3      | -1.048460245 | 3.979452782 | 2.73E-22 | 1.40E-21 | 39.8230211 |
| UBQLN2       | -1.806996549 | 5.731862971 | 2.94E-22 | 1.51E-21 | 39.7494433 |
| DCP1A        | -1.033372982 | 6.735611798 | 2.95E-22 | 1.51E-21 | 39.7462273 |
| SNX29P2      | -1.201765475 | 4.802252404 | 2.98E-22 | 1.53E-21 | 39.734476  |
| EDEM3        | -1.624414751 | 5.755088031 | 3.01E-22 | 1.55E-21 | 39.7233938 |
| FASTKD3      | -2.052478046 | 4.137014784 | 3.05E-22 | 1.56E-21 | 39.7127999 |
| MRPS6        | -1.342094811 | 7.081903871 | 3.07E-22 | 1.57E-21 | 39.7044453 |
| NDUFA5       | -1.741084223 | 3.812802051 | 3.34E-22 | 1.71E-21 | 39.6199384 |
| INSIG1       | -1.21917257  | 5.616653005 | 3.41E-22 | 1.74E-21 | 39.5999549 |
| PFN1         | -1.329539328 | 11.23493794 | 3.49E-22 | 1.78E-21 | 39.5773274 |

|               |              |             |          |          |            |
|---------------|--------------|-------------|----------|----------|------------|
| FEM1C         | -1.631518755 | 4.049975816 | 3.56E-22 | 1.81E-21 | 39.5578197 |
| PAXIP1-AS1    | -1.340497884 | 4.30570271  | 3.66E-22 | 1.87E-21 | 39.5297134 |
| PDHB          | -1.13287791  | 6.608783277 | 3.73E-22 | 1.90E-21 | 39.511651  |
| SLFN13        | -1.021329809 | 4.071730448 | 3.85E-22 | 1.96E-21 | 39.4784708 |
| PRPSAP2       | -1.149785416 | 6.42327138  | 3.90E-22 | 1.98E-21 | 39.4653586 |
| FEM1B         | -1.067720441 | 4.16988     | 4.20E-22 | 2.14E-21 | 39.3904558 |
| LIAS          | -1.291130361 | 4.305661746 | 4.33E-22 | 2.20E-21 | 39.3606103 |
| FAM122B       | -2.134049947 | 4.303101696 | 4.38E-22 | 2.22E-21 | 39.3496741 |
| LMTK3         | -1.019278641 | 3.685923398 | 4.42E-22 | 2.24E-21 | 39.3405765 |
| HINT3         | -1.164928134 | 3.440222341 | 4.47E-22 | 2.26E-21 | 39.3300803 |
| APPL2         | -1.760815724 | 4.88263194  | 4.51E-22 | 2.29E-21 | 39.3193672 |
| ZNF655        | -1.540159837 | 5.412389832 | 4.55E-22 | 2.30E-21 | 39.3122005 |
| NAA25         | -1.23049221  | 5.1698936   | 4.64E-22 | 2.35E-21 | 39.2922758 |
| NFU1          | -1.560732589 | 3.99183661  | 4.81E-22 | 2.43E-21 | 39.2564669 |
| TSN           | -1.087211054 | 5.176397298 | 4.83E-22 | 2.44E-21 | 39.2524398 |
| KDM3B         | -1.459988974 | 6.815949087 | 4.85E-22 | 2.45E-21 | 39.2470983 |
| DNAJC15       | -1.001761214 | 4.811465754 | 5.01E-22 | 2.53E-21 | 39.215015  |
| YWHAG         | -1.696421122 | 7.509902371 | 5.19E-22 | 2.62E-21 | 39.1793995 |
| LSP1          | -1.456657384 | 9.642898198 | 5.20E-22 | 2.62E-21 | 39.1785064 |
| RAB21         | -1.2823      | 3.909097067 | 5.26E-22 | 2.65E-21 | 39.1661682 |
| CABIN1        | -1.067125105 | 7.505632859 | 5.50E-22 | 2.76E-21 | 39.1211566 |
| EXOC5         | -1.474360959 | 3.936514625 | 5.62E-22 | 2.82E-21 | 39.1009243 |
| RAB5A         | -1.272549956 | 5.446964975 | 5.62E-22 | 2.82E-21 | 39.1009059 |
| MRPS30        | -1.030317325 | 4.826997626 | 6.10E-22 | 3.05E-21 | 39.0185668 |
| MAP3K8        | -1.384741117 | 5.472648325 | 6.19E-22 | 3.09E-21 | 39.0033401 |
| FYN           | -1.273254733 | 7.949554569 | 6.25E-22 | 3.12E-21 | 38.9930696 |
| ZNF721        | -1.087616965 | 5.681435673 | 6.55E-22 | 3.27E-21 | 38.9464042 |
| GAA           | -1.004619927 | 6.782073903 | 6.63E-22 | 3.31E-21 | 38.9351744 |
| EMB           | -1.116778782 | 5.925185169 | 6.89E-22 | 3.43E-21 | 38.8957649 |
| RNASE4        | -1.095909474 | 3.478185145 | 6.98E-22 | 3.48E-21 | 38.8825591 |
| PPP1R18       | -1.159871516 | 9.829745221 | 7.12E-22 | 3.54E-21 | 38.863851  |
| C5orf28       | -1.712343586 | 4.37016969  | 7.14E-22 | 3.56E-21 | 38.8598393 |
| ITPRIPL1      | -1.172953841 | 3.966805051 | 7.82E-22 | 3.88E-21 | 38.7693185 |
| DDIT4         | -1.820861274 | 6.562150176 | 8.17E-22 | 4.05E-21 | 38.7259642 |
| BC062753      | -1.168472189 | 4.404041704 | 8.28E-22 | 4.11E-21 | 38.7121075 |
| GNE           | -1.325217497 | 4.767771809 | 8.34E-22 | 4.14E-21 | 38.7046829 |
| EID2          | -1.266902146 | 4.493090149 | 8.51E-22 | 4.21E-21 | 38.6851612 |
| UQCRC2        | -1.06837011  | 6.907519765 | 8.58E-22 | 4.25E-21 | 38.6761244 |
| CTD-2292M16.8 | -1.574026792 | 3.673240726 | 8.64E-22 | 4.28E-21 | 38.6700463 |
| PSMD5-AS1     | -1.022429032 | 4.388043021 | 8.68E-22 | 4.30E-21 | 38.6646629 |
| FAM179B       | -1.682614985 | 3.430759071 | 8.85E-22 | 4.38E-21 | 38.6452021 |
| KDEL2         | -1.207425297 | 6.210730168 | 8.94E-22 | 4.42E-21 | 38.6356002 |
| ARMCX2        | -1.172672458 | 3.614044953 | 9.11E-22 | 4.50E-21 | 38.6164147 |
| PRCC          | -1.116426219 | 5.376487005 | 9.18E-22 | 4.53E-21 | 38.6095009 |
| MAN1C1        | -1.102384591 | 5.157831665 | 9.24E-22 | 4.56E-21 | 38.6029212 |
| SPIN1         | -1.697118882 | 5.122666924 | 9.35E-22 | 4.61E-21 | 38.5905395 |
| PGRMC2        | -1.018823479 | 4.902540825 | 9.48E-22 | 4.67E-21 | 38.5764667 |
| UXS1          | -1.315616344 | 5.913632431 | 9.55E-22 | 4.70E-21 | 38.5699269 |
| USP38         | -1.864569896 | 4.535745219 | 9.74E-22 | 4.79E-21 | 38.5497921 |
| SPEN          | -1.047317724 | 6.257476932 | 9.84E-22 | 4.84E-21 | 38.5394993 |
| QKI           | -1.358549977 | 5.806637237 | 1.01E-21 | 4.95E-21 | 38.5164483 |
| FOPNL         | -1.486552758 | 4.507705101 | 1.01E-21 | 4.96E-21 | 38.5146728 |
| LRPPRC        | -1.302745105 | 5.752483758 | 1.01E-21 | 4.96E-21 | 38.5146544 |
| ANKRA2        | -2.35933432  | 4.407653601 | 1.01E-21 | 4.98E-21 | 38.5093238 |
| ALG6          | -1.713431807 | 5.851485013 | 1.03E-21 | 5.06E-21 | 38.4941131 |
| TRMT2B        | -1.453461543 | 5.842622805 | 1.10E-21 | 5.37E-21 | 38.4314803 |
| ARFGAP3       | -1.705041641 | 6.429703727 | 1.13E-21 | 5.51E-21 | 38.4052461 |
| CLEC4C        | -1.219070481 | 3.633857104 | 1.19E-21 | 5.82E-21 | 38.349656  |

|              |              |             |          |          |            |
|--------------|--------------|-------------|----------|----------|------------|
| PCNP         | -1.560493264 | 5.493852558 | 1.22E-21 | 5.98E-21 | 38.3206209 |
| RP11-769O8.3 | -1.503135433 | 4.014124538 | 1.25E-21 | 6.08E-21 | 38.303092  |
| EZR          | -1.059991225 | 5.916523354 | 1.25E-21 | 6.10E-21 | 38.2999102 |
| THBD         | -1.147507753 | 5.037613356 | 1.26E-21 | 6.13E-21 | 38.2944334 |
| SULF2        | -1.479440808 | 7.057961173 | 1.27E-21 | 6.20E-21 | 38.2820413 |
| PIK3CA       | -1.51054288  | 4.58600327  | 1.32E-21 | 6.41E-21 | 38.2474184 |
| KBTBD2       | -1.478733773 | 5.664817904 | 1.34E-21 | 6.52E-21 | 38.2299914 |
| ZNF354A      | -1.457764045 | 4.749485905 | 1.36E-21 | 6.59E-21 | 38.2192822 |
| LENG1        | 1.020217364  | 5.621860356 | 1.36E-21 | 6.63E-21 | 38.2132704 |
| SERBP1       | -1.242763353 | 6.980171492 | 1.41E-21 | 6.85E-21 | 38.1791355 |
| MIS18BP1     | -1.174572478 | 3.89035499  | 1.44E-21 | 7.00E-21 | 38.1560376 |
| LOC439911    | -1.403852263 | 5.745372231 | 1.44E-21 | 7.00E-21 | 38.1559487 |
| ZCCHC7       | -1.147850803 | 5.558165625 | 1.46E-21 | 7.10E-21 | 38.141246  |
| C12orf75     | -1.813140647 | 5.713676072 | 1.48E-21 | 7.16E-21 | 38.1331732 |
| LOC644656    | -1.040907618 | 5.006070863 | 1.49E-21 | 7.23E-21 | 38.1227235 |
| LCLAT1       | -1.655222615 | 5.492973772 | 1.56E-21 | 7.57E-21 | 38.0753697 |
| AMD1         | -1.782429072 | 6.213742654 | 1.62E-21 | 7.84E-21 | 38.0383324 |
| WDR11        | -1.475924559 | 6.488056998 | 1.65E-21 | 7.95E-21 | 38.0240987 |
| ATM          | -1.17495449  | 6.128707146 | 1.67E-21 | 8.04E-21 | 38.0122465 |
| MAP3K4       | -1.257627367 | 6.486319985 | 1.68E-21 | 8.12E-21 | 38.0013276 |
| WDSUB1       | -1.707263526 | 4.166629783 | 1.71E-21 | 8.24E-21 | 37.9856153 |
| THUMPD1      | -1.835538335 | 5.43114426  | 1.72E-21 | 8.29E-21 | 37.9795365 |
| MTO1         | -1.429146933 | 4.86126046  | 1.80E-21 | 8.65E-21 | 37.9360552 |
| NAPB         | -1.316727859 | 4.686302358 | 1.82E-21 | 8.73E-21 | 37.9257783 |
| CSNK1A1      | -1.0807104   | 5.999256278 | 1.91E-21 | 9.18E-21 | 37.8752636 |
| ISOC1        | -2.396394689 | 4.792039751 | 1.92E-21 | 9.22E-21 | 37.8709086 |
| CCR6         | -1.310799834 | 5.469973775 | 2.01E-21 | 9.62E-21 | 37.8265249 |
| RBM22        | -1.295833371 | 7.264777212 | 2.03E-21 | 9.71E-21 | 37.8166144 |
| ARMCX3       | -1.444807795 | 4.752654734 | 2.05E-21 | 9.83E-21 | 37.8042877 |
| RSL1D1       | -1.187200589 | 5.943715383 | 2.11E-21 | 1.01E-20 | 37.775667  |
| MICB         | -1.358954407 | 7.410252036 | 2.29E-21 | 1.09E-20 | 37.6941578 |
| CERK         | -1.318190809 | 7.226833667 | 2.39E-21 | 1.14E-20 | 37.6520268 |
| VTA1         | -1.386275975 | 4.776701612 | 2.41E-21 | 1.15E-20 | 37.6438272 |
| SETD2        | -1.06541889  | 5.549508314 | 2.55E-21 | 1.21E-20 | 37.5871499 |
| ANXA4        | -1.560139574 | 6.452952711 | 2.57E-21 | 1.22E-20 | 37.579989  |
| TTI1         | -1.088634277 | 6.433490804 | 2.60E-21 | 1.23E-20 | 37.5688347 |
| TPK1         | -1.791644917 | 4.901122813 | 2.66E-21 | 1.26E-20 | 37.5462304 |
| EDEM1        | -1.38122417  | 7.034559749 | 2.69E-21 | 1.28E-20 | 37.5316495 |
| RSBN1L       | -1.260239756 | 5.625852021 | 2.82E-21 | 1.34E-20 | 37.4860231 |
| TRIM28       | -1.411691274 | 7.965994816 | 2.86E-21 | 1.35E-20 | 37.4716861 |
| BDP1         | -1.270804015 | 3.886182568 | 2.86E-21 | 1.36E-20 | 37.4704734 |
| FAM76B       | -1.071080187 | 3.24161615  | 2.88E-21 | 1.36E-20 | 37.4643681 |
| REEP3        | -1.17924612  | 3.190880251 | 2.95E-21 | 1.40E-20 | 37.4404648 |
| RAD51-AS1    | -1.269232365 | 5.674743326 | 3.08E-21 | 1.46E-20 | 37.3964366 |
| CECR5        | -1.21916277  | 4.995928674 | 3.11E-21 | 1.47E-20 | 37.3873152 |
| TAGAP        | -1.527072869 | 7.956161812 | 3.14E-21 | 1.48E-20 | 37.377601  |
| EAPP         | -1.556588302 | 6.399855032 | 3.28E-21 | 1.54E-20 | 37.3343797 |
| PEX2         | -1.107491604 | 4.474065356 | 3.32E-21 | 1.56E-20 | 37.3236896 |
| SHPRH        | -2.389647914 | 3.617172405 | 3.35E-21 | 1.57E-20 | 37.3144603 |
| SPCS1        | -1.455776032 | 8.713361592 | 3.36E-21 | 1.58E-20 | 37.3104597 |
| EIF1AX       | -1.798006438 | 5.46073661  | 3.49E-21 | 1.64E-20 | 37.2713605 |
| RFX7         | -1.38374812  | 4.192654397 | 3.58E-21 | 1.68E-20 | 37.2464643 |
| TMEM173      | -1.022839987 | 7.461015135 | 3.70E-21 | 1.73E-20 | 37.2151229 |
| ZC3H7A       | -1.595595577 | 5.545600469 | 3.70E-21 | 1.73E-20 | 37.2135786 |
| PRPS1        | -1.149520541 | 5.731967376 | 3.71E-21 | 1.74E-20 | 37.2119461 |
| SLC25A11     | -1.08537241  | 6.663134591 | 3.79E-21 | 1.77E-20 | 37.1906257 |
| DENND3       | -1.352106177 | 7.148998675 | 3.96E-21 | 1.85E-20 | 37.1474745 |
| SNX18        | -1.186700736 | 6.147773201 | 3.96E-21 | 1.85E-20 | 37.1468912 |

|               |              |             |          |          |            |
|---------------|--------------|-------------|----------|----------|------------|
| ADSS          | -1.006830028 | 4.141279593 | 4.04E-21 | 1.88E-20 | 37.1262253 |
| SRSF10        | -1.601058278 | 4.762049093 | 4.08E-21 | 1.90E-20 | 37.116336  |
| CYP27A1       | -1.080116407 | 7.317451798 | 4.37E-21 | 2.03E-20 | 37.0474197 |
| NIPBL         | -1.323867712 | 6.399179578 | 4.48E-21 | 2.08E-20 | 37.0225047 |
| CTA-250D10.23 | -1.046919232 | 5.219254534 | 4.50E-21 | 2.09E-20 | 37.0174451 |
| MORF4L2       | -1.424797444 | 5.287744662 | 4.61E-21 | 2.14E-20 | 36.9942335 |
| ORC2          | -1.237233044 | 5.414650277 | 4.64E-21 | 2.15E-20 | 36.9876109 |
| RANBP2        | -1.647917361 | 5.306170091 | 4.69E-21 | 2.18E-20 | 36.9776146 |
| SMAD5         | -1.120038761 | 4.33612054  | 4.75E-21 | 2.20E-20 | 36.9642387 |
| MRPS9         | -1.071238234 | 4.949136753 | 4.84E-21 | 2.24E-20 | 36.9459116 |
| KIFAP3        | -1.356749665 | 5.282413931 | 4.89E-21 | 2.26E-20 | 36.9360538 |
| TBCB          | -1.002247982 | 7.456485347 | 5.05E-21 | 2.34E-20 | 36.9023036 |
| AKIRIN1       | -1.252417692 | 6.244317623 | 5.13E-21 | 2.37E-20 | 36.8872939 |
| CDC26         | -1.24643439  | 6.95633588  | 5.21E-21 | 2.41E-20 | 36.8712403 |
| PHOSPHO2      | -1.620592228 | 3.568771366 | 5.25E-21 | 2.42E-20 | 36.864592  |
| KBTD7         | -1.695676121 | 3.904993599 | 5.28E-21 | 2.44E-20 | 36.8588325 |
| ZFP36L2       | -1.342659199 | 7.159578671 | 5.31E-21 | 2.45E-20 | 36.8530504 |
| BRAF          | -1.076965537 | 4.970019016 | 5.55E-21 | 2.56E-20 | 36.8080561 |
| HSPB11        | -1.062034339 | 4.394862577 | 5.57E-21 | 2.56E-20 | 36.8057393 |
| PDK3          | -1.008917706 | 6.350221032 | 5.57E-21 | 2.57E-20 | 36.8040984 |
| GPR25         | -1.043630897 | 3.90828536  | 5.82E-21 | 2.68E-20 | 36.7613171 |
| BCL9L         | -1.036107363 | 7.095942763 | 5.89E-21 | 2.71E-20 | 36.7495092 |
| THAP1         | -1.772460877 | 4.054570482 | 5.90E-21 | 2.71E-20 | 36.7474875 |
| POT1          | -1.395178542 | 4.302472744 | 5.91E-21 | 2.72E-20 | 36.7454299 |
| RP11-473I1.9  | -1.024019976 | 5.7829859   | 5.93E-21 | 2.73E-20 | 36.7421583 |
| ABAT          | -1.25039402  | 5.452093362 | 5.99E-21 | 2.75E-20 | 36.7329778 |
| LRBA          | -1.159545807 | 5.893587662 | 6.14E-21 | 2.82E-20 | 36.7078593 |
| MRFAP1        | -1.875851602 | 8.734730482 | 6.18E-21 | 2.84E-20 | 36.7002589 |
| LINC00339     | -1.257045343 | 5.301078328 | 6.41E-21 | 2.94E-20 | 36.6646135 |
| LDLRAP1       | -1.08252709  | 8.190874945 | 6.56E-21 | 3.00E-20 | 36.6414209 |
| HEATR5B       | -1.490077594 | 5.690907032 | 6.57E-21 | 3.01E-20 | 36.6394425 |
| LOC389765     | -1.418202059 | 3.943496115 | 6.69E-21 | 3.06E-20 | 36.6223105 |
| ACTL6A        | -1.850633257 | 5.026963086 | 6.80E-21 | 3.11E-20 | 36.6046381 |
| PGGT1B        | -1.389452152 | 3.828373715 | 6.82E-21 | 3.12E-20 | 36.60279   |
| TMED10        | -1.110351581 | 6.881919026 | 6.82E-21 | 3.12E-20 | 36.6019087 |
| GLOD4         | -1.685579405 | 5.077888223 | 6.91E-21 | 3.16E-20 | 36.589851  |
| VWA9          | -1.010852129 | 5.078185322 | 6.94E-21 | 3.17E-20 | 36.5847423 |
| PNISR         | -1.408363301 | 6.975893622 | 6.98E-21 | 3.19E-20 | 36.5795252 |
| RPAP3         | -1.529877198 | 4.010437933 | 7.16E-21 | 3.27E-20 | 36.5532721 |
| PRF1          | -1.631852771 | 8.908477231 | 7.19E-21 | 3.28E-20 | 36.5501054 |
| EMC2          | -1.757005073 | 3.162974462 | 7.44E-21 | 3.39E-20 | 36.5146562 |
| CORO1C        | -1.382495092 | 7.371817063 | 7.48E-21 | 3.41E-20 | 36.5101597 |
| KLRC3         | -1.771740802 | 3.607373566 | 7.50E-21 | 3.41E-20 | 36.5073862 |
| SPAG9         | -1.396950841 | 6.010800557 | 7.58E-21 | 3.45E-20 | 36.497088  |
| PIK3AP1       | -1.737618574 | 6.278401419 | 7.66E-21 | 3.48E-20 | 36.4866792 |
| ARHGEF18      | -1.293310952 | 9.207858588 | 7.70E-21 | 3.50E-20 | 36.4805906 |
| ATP8B4        | -1.32857403  | 3.086189545 | 7.76E-21 | 3.53E-20 | 36.4726112 |
| ERBB2IP       | -1.968879836 | 5.174306095 | 7.80E-21 | 3.54E-20 | 36.4681391 |
| ANKMY2        | -1.387951867 | 5.007247054 | 7.92E-21 | 3.60E-20 | 36.4527184 |
| DENND2D       | -1.483289407 | 6.842730863 | 8.00E-21 | 3.63E-20 | 36.4426412 |
| SRP72         | -1.239012939 | 5.282947697 | 8.11E-21 | 3.68E-20 | 36.4291883 |
| MAK16         | -1.296975391 | 5.34304127  | 8.17E-21 | 3.70E-20 | 36.4221652 |
| XRN1          | -1.425105035 | 4.725052451 | 8.28E-21 | 3.75E-20 | 36.4081802 |
| TMEM203       | -1.189873952 | 7.070590806 | 8.37E-21 | 3.79E-20 | 36.3971591 |
| PPM1K         | -1.039490582 | 4.802511517 | 8.40E-21 | 3.80E-20 | 36.3941404 |
| RPS6KB1       | -1.453802472 | 4.961627742 | 8.63E-21 | 3.90E-20 | 36.3672274 |
| GSDMB         | -1.071783055 | 5.488561751 | 8.73E-21 | 3.94E-20 | 36.3553879 |
| AHSA2         | -1.27946129  | 5.205457772 | 8.81E-21 | 3.98E-20 | 36.3459476 |

|            |              |             |          |          |            |
|------------|--------------|-------------|----------|----------|------------|
| EEA1       | -1.018138389 | 2.923317559 | 8.85E-21 | 4.00E-20 | 36.3417    |
| CPSF6      | -1.365686103 | 4.589731441 | 9.06E-21 | 4.09E-20 | 36.3186138 |
| MCUR1      | -1.222318567 | 4.932760943 | 9.22E-21 | 4.16E-20 | 36.3004563 |
| SUCLA2     | -2.275941099 | 3.941655403 | 9.45E-21 | 4.25E-20 | 36.2765425 |
| UBLCP1     | -1.844478668 | 6.621468032 | 9.63E-21 | 4.33E-20 | 36.257655  |
| NOL7       | -1.01000298  | 6.61086173  | 1.01E-20 | 4.55E-20 | 36.2075048 |
| XRCC5      | -1.072140718 | 7.089770614 | 1.02E-20 | 4.57E-20 | 36.2031087 |
| ANKRD36B   | -2.005398398 | 5.991391019 | 1.04E-20 | 4.68E-20 | 36.1780959 |
| FLJ31306   | -2.219898751 | 5.679775069 | 1.08E-20 | 4.84E-20 | 36.1425481 |
| PRRG4      | -1.388224261 | 6.116598992 | 1.12E-20 | 5.00E-20 | 36.1095738 |
| ATR        | -1.177035739 | 4.185154466 | 1.14E-20 | 5.09E-20 | 36.0896253 |
| GLTSCR1L   | -1.152949837 | 7.320276895 | 1.14E-20 | 5.11E-20 | 36.0864716 |
| NLRC4      | -1.066560768 | 4.538504475 | 1.16E-20 | 5.18E-20 | 36.0705359 |
| ITGB3BP    | -1.465064229 | 3.920927545 | 1.18E-20 | 5.26E-20 | 36.056196  |
| MDFIC      | -1.300205541 | 4.61819353  | 1.20E-20 | 5.34E-20 | 36.0398442 |
| BROX       | -1.194982799 | 4.666231469 | 1.21E-20 | 5.39E-20 | 36.0307246 |
| LINC00028  | 1.09058192   | 5.275810939 | 1.21E-20 | 5.41E-20 | 36.0262861 |
| RANBP9     | -1.170833994 | 4.802031968 | 1.24E-20 | 5.53E-20 | 36.0035142 |
| PRKY       | -1.615789295 | 4.04330447  | 1.25E-20 | 5.56E-20 | 35.9983004 |
| EBLN3      | -1.913216434 | 6.013182154 | 1.29E-20 | 5.74E-20 | 35.9636867 |
| DLEU2      | -1.264573955 | 5.72462452  | 1.35E-20 | 5.99E-20 | 35.921768  |
| LILRB1     | -1.083256285 | 7.073699202 | 1.39E-20 | 6.17E-20 | 35.8901479 |
| CEBPD      | -1.227004603 | 6.316733086 | 1.41E-20 | 6.27E-20 | 35.8743789 |
|            | 6-Sep        | 6.99049169  | 1.41E-20 | 6.27E-20 | 35.8743502 |
| TGFBR1     | -1.281731221 | 6.082977138 | 1.42E-20 | 6.29E-20 | 35.8709543 |
| NR2C2      | -1.442308913 | 4.996788786 | 1.48E-20 | 6.55E-20 | 35.8278004 |
| POLI       | -1.314443176 | 2.825248312 | 1.49E-20 | 6.58E-20 | 35.8232194 |
| TCFL5      | -1.166847675 | 4.490772951 | 1.51E-20 | 6.69E-20 | 35.8049029 |
| FIBP       | -1.006544112 | 7.293932595 | 1.53E-20 | 6.78E-20 | 35.7916128 |
| TAPBP      | -1.005937047 | 7.491288005 | 1.55E-20 | 6.85E-20 | 35.7810492 |
| ATP11C     | -1.002474391 | 3.487186187 | 1.59E-20 | 7.04E-20 | 35.7524682 |
| MIS12      | -1.70192376  | 5.602512118 | 1.63E-20 | 7.18E-20 | 35.7321982 |
| ARRB2      | -1.008947877 | 9.46541808  | 1.63E-20 | 7.18E-20 | 35.7320139 |
| WDFY3      | -1.258000926 | 5.457445054 | 1.66E-20 | 7.31E-20 | 35.7126655 |
| KDM2B      | -1.543462196 | 6.526643341 | 1.70E-20 | 7.47E-20 | 35.6901395 |
| CYP20A1    | -1.19814621  | 4.729190041 | 1.71E-20 | 7.52E-20 | 35.6825377 |
| U2SURP     | -1.479087896 | 4.596965438 | 1.72E-20 | 7.57E-20 | 35.6756252 |
| GNAQ       | -1.308264604 | 6.394382061 | 1.77E-20 | 7.77E-20 | 35.6495551 |
| C1orf85    | -1.036727061 | 5.332713752 | 1.77E-20 | 7.78E-20 | 35.6467824 |
| LDOC1L     | -1.036360291 | 6.061684338 | 1.81E-20 | 7.93E-20 | 35.6268555 |
| ADO        | -1.523297802 | 5.179778034 | 1.86E-20 | 8.15E-20 | 35.598326  |
| RFWD3      | -1.312749119 | 5.727517584 | 1.90E-20 | 8.30E-20 | 35.579788  |
| KB-431C1.5 | -1.130459374 | 3.927962928 | 1.91E-20 | 8.38E-20 | 35.5699377 |
| CYTH4      | -1.136805891 | 6.978892922 | 1.92E-20 | 8.43E-20 | 35.5647429 |
| SMURF2     | -1.321590662 | 5.349880562 | 1.93E-20 | 8.44E-20 | 35.5630981 |
| GMNN       | -1.299841054 | 3.982157533 | 1.93E-20 | 8.46E-20 | 35.5608249 |
| SH3BP5     | -1.188639838 | 7.947783621 | 1.94E-20 | 8.48E-20 | 35.557989  |
| SMIM20     | -1.309283707 | 4.837761419 | 1.94E-20 | 8.49E-20 | 35.556719  |
| SLC12A6    | -1.207689024 | 6.834564636 | 1.98E-20 | 8.64E-20 | 35.5381153 |
| DCAF16     | -1.072640835 | 4.547051418 | 2.05E-20 | 8.94E-20 | 35.5026942 |
| PGK1       | -1.145498952 | 7.058104375 | 2.06E-20 | 8.98E-20 | 35.4980265 |
| RNF141     | -1.228394612 | 4.751848718 | 2.08E-20 | 9.06E-20 | 35.4888432 |
| CNOT8      | -1.826015094 | 6.271705168 | 2.11E-20 | 9.19E-20 | 35.4730111 |
| APOL6      | -1.184289618 | 5.485222338 | 2.14E-20 | 9.34E-20 | 35.4571839 |
| HNRNPR     | -1.009100654 | 6.700244286 | 2.16E-20 | 9.40E-20 | 35.4500279 |
| H2AFV      | -1.247313822 | 6.384981302 | 2.18E-20 | 9.48E-20 | 35.4412933 |
| SEPHS2     | -1.115313477 | 7.979337437 | 2.27E-20 | 9.88E-20 | 35.3982666 |
| CMTR2      | -2.65267312  | 3.907286583 | 2.32E-20 | 1.01E-19 | 35.3788014 |

|           |              |             |          |          |            |
|-----------|--------------|-------------|----------|----------|------------|
| INTS12    | -1.058380583 | 5.287663103 | 2.34E-20 | 1.02E-19 | 35.3689761 |
| FUBP1     | -1.18453372  | 4.725046787 | 2.37E-20 | 1.03E-19 | 35.3553342 |
| DNAJB6    | -1.380098952 | 6.2031506   | 2.47E-20 | 1.07E-19 | 35.3132465 |
| FBLN5     | -1.264820172 | 4.76035186  | 2.58E-20 | 1.11E-19 | 35.2725284 |
| RBM4      | -1.548193351 | 6.175631914 | 2.61E-20 | 1.13E-19 | 35.2605742 |
| LRRC69    | -1.201295463 | 4.92179113  | 2.61E-20 | 1.13E-19 | 35.2582709 |
| FYTTD1    | -2.010847702 | 5.929065811 | 2.64E-20 | 1.14E-19 | 35.2500818 |
| GTF3C6    | -1.001584254 | 7.81747926  | 2.64E-20 | 1.14E-19 | 35.2484872 |
| SOCS4     | -1.063043503 | 3.820658345 | 2.66E-20 | 1.15E-19 | 35.2415242 |
| EIF3H     | -1.138206541 | 6.193760818 | 2.67E-20 | 1.15E-19 | 35.2386785 |
| TNFAIP8L1 | -1.089703082 | 5.586730789 | 2.67E-20 | 1.15E-19 | 35.2355765 |
| ABRACL    | -1.880519051 | 6.670166672 | 2.68E-20 | 1.15E-19 | 35.233421  |
| ARNTL     | -1.423516375 | 6.342410183 | 2.74E-20 | 1.18E-19 | 35.2106032 |
| STK38L    | -1.735878796 | 5.191027243 | 2.83E-20 | 1.22E-19 | 35.1784654 |
| AMPD2     | -1.228522908 | 7.799632789 | 2.84E-20 | 1.22E-19 | 35.1759586 |
| LOC157860 | 1.16960614   | 4.034104246 | 2.86E-20 | 1.23E-19 | 35.1683024 |
| UBE2N     | -1.419287966 | 6.465210371 | 2.90E-20 | 1.24E-19 | 35.1550434 |
| HAUS1     | -1.656087521 | 4.357028312 | 2.90E-20 | 1.25E-19 | 35.1533247 |
| PHACTR2   | -1.158325888 | 5.32791589  | 2.91E-20 | 1.25E-19 | 35.1504103 |
| UBE2D1    | -1.662757654 | 4.190374364 | 2.91E-20 | 1.25E-19 | 35.1493459 |
| ZEB2      | -1.200920886 | 5.064635274 | 2.92E-20 | 1.25E-19 | 35.1482672 |
| VAMP2     | -1.089581552 | 6.503482183 | 2.93E-20 | 1.26E-19 | 35.1424849 |
| GORASP2   | -1.276524295 | 6.765564756 | 2.94E-20 | 1.26E-19 | 35.1409511 |
| TRIB2     | -1.162754008 | 5.851955772 | 3.09E-20 | 1.32E-19 | 35.091845  |
| P4HB      | -1.043002294 | 7.187390097 | 3.10E-20 | 1.33E-19 | 35.0867582 |
| JKAMP     | -1.841800304 | 4.524949192 | 3.41E-20 | 1.45E-19 | 34.9937257 |
| BLOC1S4   | -1.097946625 | 7.15739754  | 3.43E-20 | 1.46E-19 | 34.9860503 |
| PCYOX1    | -1.128857849 | 4.762357456 | 3.45E-20 | 1.47E-19 | 34.9820143 |
| GIMAP1    | -1.218618817 | 7.187656798 | 3.49E-20 | 1.49E-19 | 34.9692167 |
| 7-Mar     | -1.292455472 | 5.275304945 | 3.59E-20 | 1.53E-19 | 34.9410565 |
| FPGT      | -1.81183887  | 3.466719424 | 3.71E-20 | 1.58E-19 | 34.908756  |
| HNRNPK    | -1.645483493 | 9.072510072 | 3.77E-20 | 1.60E-19 | 34.8917038 |
| CAAP1     | -1.129356104 | 3.697441513 | 3.87E-20 | 1.64E-19 | 34.867017  |
| C19orf68  | 1.150497161  | 5.569706483 | 4.00E-20 | 1.70E-19 | 34.8328597 |
| CCPG1     | -2.139585534 | 5.255961565 | 4.00E-20 | 1.70E-19 | 34.8316975 |
| PPM1B     | -2.010004192 | 5.325017354 | 4.13E-20 | 1.75E-19 | 34.8008668 |
| MRPS18B   | -1.0149461   | 6.476943405 | 4.15E-20 | 1.76E-19 | 34.7949101 |
| DGCR14    | 1.048084086  | 7.106160835 | 4.20E-20 | 1.78E-19 | 34.7846819 |
| SAMHD1    | -1.123554217 | 8.20163425  | 4.20E-20 | 1.78E-19 | 34.7842954 |
| MBD4      | -1.401573289 | 6.854265271 | 4.23E-20 | 1.79E-19 | 34.7760257 |
| IARS2     | -2.004504691 | 6.434171809 | 4.38E-20 | 1.85E-19 | 34.7420547 |
| TERF1     | -1.11556263  | 5.704855989 | 4.42E-20 | 1.87E-19 | 34.7327546 |
| BAG4      | -1.020378641 | 4.489308223 | 4.44E-20 | 1.88E-19 | 34.7278968 |
| LANCL1    | -1.121584275 | 5.624765237 | 4.54E-20 | 1.92E-19 | 34.7059811 |
| DENND4A   | -1.346419378 | 4.529175027 | 4.73E-20 | 1.99E-19 | 34.6655459 |
| ZNF302    | -1.344037387 | 3.799144888 | 5.01E-20 | 2.11E-19 | 34.6071715 |
| PBXIP1    | -1.004255876 | 7.236861097 | 5.03E-20 | 2.12E-19 | 34.6029106 |
| C19orf52  | -1.091676719 | 4.1623398   | 5.06E-20 | 2.13E-19 | 34.5971903 |
| XRCC6     | -1.046081271 | 6.008855844 | 5.11E-20 | 2.14E-19 | 34.5886266 |
| YWHAZ     | -1.556637262 | 7.967045859 | 5.17E-20 | 2.17E-19 | 34.5757178 |
| GBAS      | -2.296965059 | 5.106195283 | 5.20E-20 | 2.18E-19 | 34.5695917 |
| ARID2     | -1.079899475 | 6.074933053 | 5.24E-20 | 2.20E-19 | 34.5634748 |
| PIK3CG    | -1.39248436  | 5.711463736 | 5.24E-20 | 2.20E-19 | 34.5631278 |
| SNRNP27   | -1.160510032 | 5.801572875 | 5.29E-20 | 2.22E-19 | 34.5526192 |
| MAP3K2    | -1.126520935 | 4.618334788 | 5.47E-20 | 2.29E-19 | 34.5199626 |
| PDIA6     | -1.383616847 | 6.701213464 | 5.53E-20 | 2.32E-19 | 34.5079676 |
| LINC01215 | -2.110496249 | 4.235048044 | 5.71E-20 | 2.39E-19 | 34.4764671 |
| PAPD5     | -1.312100967 | 5.704258787 | 5.83E-20 | 2.44E-19 | 34.4563703 |



|                |              |             |          |          |            |
|----------------|--------------|-------------|----------|----------|------------|
| TOMM70A        | -1.240998529 | 5.89018044  | 5.99E-20 | 2.50E-19 | 34.4286162 |
| DHX16          | -1.032781741 | 6.159839664 | 6.19E-20 | 2.58E-19 | 34.3956377 |
| SPIN4          | -1.25976385  | 2.669919058 | 6.30E-20 | 2.63E-19 | 34.3783207 |
| PHACTR4        | -1.103346841 | 5.894416872 | 6.58E-20 | 2.74E-19 | 34.334904  |
| DUSP11         | -1.432247297 | 6.320473215 | 6.62E-20 | 2.76E-19 | 34.3291883 |
| MAP2K1         | -1.73653415  | 6.828035641 | 6.64E-20 | 2.76E-19 | 34.3256329 |
| SYTL1          | -1.172405145 | 8.52936234  | 6.77E-20 | 2.81E-19 | 34.3071648 |
| HELZ           | -1.076588454 | 5.460032806 | 6.85E-20 | 2.85E-19 | 34.2943912 |
| CUL3           | -1.249049575 | 5.107669214 | 6.91E-20 | 2.87E-19 | 34.2858159 |
| MRPL18         | -1.153809327 | 7.178696436 | 6.99E-20 | 2.90E-19 | 34.2743796 |
| PPP3CB         | -1.242898804 | 5.579211238 | 7.21E-20 | 2.99E-19 | 34.2432871 |
| SMEK1          | -1.158214981 | 5.792096123 | 7.34E-20 | 3.05E-19 | 34.2257076 |
| RP11-732A19.1  | -1.199938549 | 5.181881191 | 7.44E-20 | 3.09E-19 | 34.2117353 |
| CCAR1          | -1.43063439  | 4.998454768 | 7.55E-20 | 3.13E-19 | 34.1972743 |
| DOCK8          | -1.2837087   | 6.799691511 | 7.63E-20 | 3.16E-19 | 34.187297  |
| GLT8D1         | -1.218389255 | 5.626113506 | 7.77E-20 | 3.21E-19 | 34.1692976 |
| ME2            | -1.380079688 | 6.456263598 | 7.78E-20 | 3.22E-19 | 34.1674391 |
| TAF12          | -1.176039546 | 5.483304004 | 7.85E-20 | 3.24E-19 | 34.1586091 |
| SLC25A45       | -1.003239793 | 4.865588262 | 7.89E-20 | 3.26E-19 | 34.1537911 |
| NR1D2          | -1.846713489 | 5.330912689 | 7.91E-20 | 3.27E-19 | 34.1507601 |
| MFSD5          | -1.145091255 | 6.911997914 | 8.01E-20 | 3.30E-19 | 34.1383446 |
| MTMR4          | -1.02433543  | 6.54753963  | 8.06E-20 | 3.32E-19 | 34.1324031 |
| POLR2E         | -1.035935519 | 7.536359283 | 8.06E-20 | 3.32E-19 | 34.1322364 |
| ETF1           | -1.101020327 | 6.343987496 | 8.11E-20 | 3.34E-19 | 34.1261929 |
| WDR82          | -1.265460451 | 8.501129536 | 8.14E-20 | 3.36E-19 | 34.1220014 |
| DDX39A         | -1.209640045 | 6.858348477 | 8.22E-20 | 3.39E-19 | 34.1125539 |
| RAB28          | -1.056939835 | 3.615935782 | 8.30E-20 | 3.42E-19 | 34.1021308 |
| PUM1           | -1.352599411 | 7.172664956 | 8.41E-20 | 3.46E-19 | 34.0900341 |
| UBE2W          | -1.145917342 | 4.105269856 | 8.54E-20 | 3.51E-19 | 34.0746069 |
| LOC100291323   | -1.141800973 | 3.984284015 | 8.90E-20 | 3.66E-19 | 34.033061  |
| DSTN           | -1.062465239 | 5.520587104 | 8.92E-20 | 3.67E-19 | 34.0306601 |
| PPCS           | -1.167601798 | 5.893448602 | 9.43E-20 | 3.87E-19 | 33.9748814 |
| EPM2AIP1       | -1.266634463 | 5.93842654  | 9.52E-20 | 3.91E-19 | 33.9657399 |
| PLAGL1         | -1.605360546 | 5.677465551 | 9.77E-20 | 4.00E-19 | 33.940068  |
| NAA50          | -1.622121622 | 4.252966102 | 9.97E-20 | 4.09E-19 | 33.9195441 |
| IRF1           | -1.310864514 | 8.824042902 | 1.02E-19 | 4.19E-19 | 33.8927143 |
| SLFN11         | -1.244336714 | 5.087611142 | 1.03E-19 | 4.22E-19 | 33.885694  |
| DDX3X          | -1.204046214 | 5.370261346 | 1.04E-19 | 4.25E-19 | 33.8779487 |
| RP11-488L18.10 | -2.198121443 | 3.964790361 | 1.06E-19 | 4.34E-19 | 33.856382  |
| TRMT6          | -1.034279037 | 5.292552048 | 1.07E-19 | 4.37E-19 | 33.847888  |
| RAB11FIP2      | -1.279560545 | 5.381429313 | 1.09E-19 | 4.44E-19 | 33.8307036 |
| NUP50          | -1.016119504 | 5.226759211 | 1.10E-19 | 4.48E-19 | 33.8234193 |
| FGD4           | -1.042729989 | 4.628238562 | 1.10E-19 | 4.48E-19 | 33.8232683 |
| TP53INP2       | -1.235174968 | 5.791912343 | 1.11E-19 | 4.53E-19 | 33.8099668 |
| TTC14          | -1.647167479 | 4.334086479 | 1.13E-19 | 4.62E-19 | 33.7904551 |
| MYO1F          | -1.247045564 | 10.35422897 | 1.13E-19 | 4.62E-19 | 33.7900518 |
| PKN2           | -1.827353475 | 5.467616754 | 1.14E-19 | 4.65E-19 | 33.7827594 |
| ZBED1          | -1.089412798 | 6.153172926 | 1.15E-19 | 4.67E-19 | 33.7787681 |
| ACVR1          | -1.562086336 | 5.242645167 | 1.16E-19 | 4.71E-19 | 33.7692464 |
| ADH5           | -1.439239212 | 5.720268414 | 1.18E-19 | 4.80E-19 | 33.749544  |
| LYPLAL1        | -1.529351058 | 4.584515884 | 1.19E-19 | 4.81E-19 | 33.7463277 |
| UBR5           | -1.662463499 | 4.902586452 | 1.22E-19 | 4.95E-19 | 33.7176435 |
| MLLT11         | -1.079312528 | 5.634515527 | 1.23E-19 | 4.99E-19 | 33.7106676 |
| ATF1           | -1.743930405 | 3.927478169 | 1.23E-19 | 5.00E-19 | 33.7085384 |
| YIPF5          | -1.207859486 | 5.591792067 | 1.24E-19 | 5.05E-19 | 33.6974961 |
| CTSC           | -1.117939912 | 6.902472174 | 1.25E-19 | 5.06E-19 | 33.6955444 |
| TSC22D3        | -1.096556639 | 7.38966122  | 1.29E-19 | 5.23E-19 | 33.6610367 |
| TMEM251        | -1.901050224 | 5.257200258 | 1.34E-19 | 5.41E-19 | 33.6263907 |

|            |              |             |          |          |            |
|------------|--------------|-------------|----------|----------|------------|
| VCPKMT     | -1.476455335 | 6.238251036 | 1.38E-19 | 5.58E-19 | 33.5942017 |
| LINC00621  | -1.794486514 | 4.446673377 | 1.38E-19 | 5.58E-19 | 33.5935009 |
| RPL7L1     | -1.282608876 | 7.811009514 | 1.41E-19 | 5.68E-19 | 33.5759901 |
| HIGD1A     | -1.25523953  | 5.946159864 | 1.42E-19 | 5.73E-19 | 33.566803  |
| PLEKHA1    | -1.605466009 | 6.095734831 | 1.42E-19 | 5.73E-19 | 33.5656434 |
| PASK       | -1.034521935 | 5.287784732 | 1.43E-19 | 5.77E-19 | 33.559847  |
| LAT        | -1.030658218 | 7.108521358 | 1.44E-19 | 5.83E-19 | 33.5489796 |
| PPP1R2     | -1.152306299 | 5.915567124 | 1.49E-19 | 5.99E-19 | 33.5206975 |
| UBXN4      | -1.140557877 | 5.709290318 | 1.50E-19 | 6.06E-19 | 33.5098437 |
| NKTR       | -1.0158063   | 5.881647242 | 1.54E-19 | 6.21E-19 | 33.483724  |
| PPAPDC2    | -1.690890172 | 4.657338723 | 1.56E-19 | 6.30E-19 | 33.4695344 |
| CCNL1      | -1.105322387 | 5.061199025 | 1.58E-19 | 6.37E-19 | 33.4584387 |
| ABHD14B    | -1.017373439 | 6.73293558  | 1.62E-19 | 6.52E-19 | 33.4342496 |
| TMX3       | -1.111251427 | 3.821166474 | 1.63E-19 | 6.56E-19 | 33.4279501 |
| VIPR1      | -1.089726183 | 6.611335473 | 1.67E-19 | 6.71E-19 | 33.404412  |
| CXorf65    | -1.2018692   | 5.319648528 | 1.72E-19 | 6.91E-19 | 33.374423  |
| SIGIRR     | -1.08884676  | 7.097575882 | 1.76E-19 | 7.06E-19 | 33.3512735 |
| OARD1      | -1.06273668  | 6.389641052 | 1.80E-19 | 7.21E-19 | 33.3299949 |
| SS18L1     | -1.979082684 | 4.311099054 | 1.86E-19 | 7.44E-19 | 33.2981893 |
| DCTD       | -1.039818184 | 6.109913739 | 1.87E-19 | 7.48E-19 | 33.2920196 |
| KLHL24     | -1.027066507 | 5.102379671 | 1.90E-19 | 7.62E-19 | 33.2732632 |
| KDM6A      | -1.366986824 | 4.606994558 | 1.95E-19 | 7.81E-19 | 33.2480186 |
| ARF4       | -1.445386833 | 7.632961725 | 1.97E-19 | 7.89E-19 | 33.2370449 |
| ZBTB41     | -1.92260703  | 3.189552985 | 1.98E-19 | 7.91E-19 | 33.2332522 |
| PGM1       | -1.102348227 | 6.917910446 | 2.00E-19 | 7.99E-19 | 33.2230321 |
| KPNA2      | -1.455606582 | 6.665740279 | 2.05E-19 | 8.19E-19 | 33.197518  |
| CHST12     | -1.065087268 | 6.698646983 | 2.05E-19 | 8.20E-19 | 33.196726  |
| PRR12      | -1.057255079 | 5.775484214 | 2.08E-19 | 8.31E-19 | 33.1824222 |
| CACNA2D3   | -1.422454508 | 5.584502318 | 2.10E-19 | 8.38E-19 | 33.1735508 |
| DHTKD1     | -1.01577727  | 5.916137775 | 2.13E-19 | 8.48E-19 | 33.1608665 |
| ZFAND6     | -1.189202651 | 7.272048943 | 2.22E-19 | 8.85E-19 | 33.1173355 |
| RRAGD      | -1.383507397 | 6.143957786 | 2.25E-19 | 8.94E-19 | 33.1076036 |
| DENND4C    | -1.135321689 | 5.001287376 | 2.36E-19 | 9.37E-19 | 33.0590204 |
| IL18R1     | -1.629847151 | 4.131796845 | 2.40E-19 | 9.54E-19 | 33.0397643 |
| TMX2       | -1.009457259 | 7.452733779 | 2.40E-19 | 9.54E-19 | 33.0395203 |
| TMEM41B    | -1.681571204 | 5.453282263 | 2.42E-19 | 9.59E-19 | 33.0336328 |
| FNTA       | -1.377468622 | 6.163336509 | 2.43E-19 | 9.62E-19 | 33.0303571 |
| ARRDC4     | -1.891482979 | 5.298937718 | 2.44E-19 | 9.68E-19 | 33.0236586 |
| LTN1       | -1.145359805 | 4.69478964  | 2.61E-19 | 1.03E-18 | 32.9576728 |
| CSGALNACT2 | -1.968175532 | 5.187924108 | 2.69E-19 | 1.06E-18 | 32.9272058 |
| GGCT       | -1.193384376 | 5.954114052 | 2.87E-19 | 1.13E-18 | 32.8606205 |
| BBX        | -1.025329424 | 6.666515952 | 3.04E-19 | 1.19E-18 | 32.8061137 |
| WSB1       | -1.001462718 | 6.491949728 | 3.06E-19 | 1.20E-18 | 32.796948  |
| PAPOLA     | -1.428181437 | 5.979973736 | 3.27E-19 | 1.28E-18 | 32.7315413 |
| CIR1       | -1.040973354 | 5.291376428 | 3.28E-19 | 1.29E-18 | 32.728862  |
| ANAPC5     | -1.034506759 | 6.910036601 | 3.33E-19 | 1.31E-18 | 32.7141089 |
| LRRC37A3   | -1.269070636 | 5.182364289 | 3.33E-19 | 1.31E-18 | 32.7134172 |
| ATP6V1C1   | -1.281152411 | 4.741072546 | 3.35E-19 | 1.31E-18 | 32.7086162 |
| TECR       | -1.242263528 | 5.441491454 | 3.36E-19 | 1.32E-18 | 32.7058478 |
| ANXA7      | -1.199688651 | 7.982446663 | 3.50E-19 | 1.37E-18 | 32.6638202 |
| RFC4       | -1.26470762  | 4.540943195 | 3.66E-19 | 1.43E-18 | 32.6184673 |
| UBE2D2     | -1.068220534 | 6.290531977 | 3.74E-19 | 1.46E-18 | 32.5976605 |
| SPAG1      | -1.54439082  | 3.089273994 | 3.77E-19 | 1.47E-18 | 32.5887473 |
| HVCN1      | -1.04524094  | 8.668294862 | 3.80E-19 | 1.48E-18 | 32.5821131 |
| NUDT19     | -1.743949109 | 5.498263902 | 3.83E-19 | 1.49E-18 | 32.5748386 |
| NLK        | -1.031050053 | 5.062535123 | 3.88E-19 | 1.51E-18 | 32.561129  |
| SUV420H1   | -1.006114553 | 6.440697531 | 3.88E-19 | 1.51E-18 | 32.5605803 |
| GK         | -1.310457969 | 5.548404783 | 4.15E-19 | 1.62E-18 | 32.4924795 |

|             |              |             |          |          |            |
|-------------|--------------|-------------|----------|----------|------------|
| FAM175A     | -1.190327536 | 3.530823258 | 4.22E-19 | 1.64E-18 | 32.4770794 |
| AMIGO2      | -2.120699712 | 4.345289445 | 4.26E-19 | 1.66E-18 | 32.4677974 |
| CEP63       | -1.09538605  | 4.904289772 | 4.36E-19 | 1.69E-18 | 32.4439793 |
| RP3-368A4.6 | -1.860749647 | 3.472429752 | 4.52E-19 | 1.75E-18 | 32.4086769 |
| FAM69A      | -1.01295789  | 4.011233728 | 4.56E-19 | 1.77E-18 | 32.3992535 |
| MST4        | -2.015947649 | 4.621173343 | 4.94E-19 | 1.91E-18 | 32.3200084 |
| ZNF200      | -1.377699041 | 5.776349378 | 4.95E-19 | 1.91E-18 | 32.3175048 |
| APOBEC3C    | -1.194739785 | 7.138499241 | 4.96E-19 | 1.92E-18 | 32.3144784 |
| PRKCQ       | -1.293352321 | 6.777616531 | 5.05E-19 | 1.95E-18 | 32.2974012 |
| KLF4        | -1.268553944 | 5.938488131 | 5.18E-19 | 2.00E-18 | 32.2718912 |
| DROSHA      | -1.128046804 | 5.756699823 | 5.22E-19 | 2.01E-18 | 32.2643936 |
| PPTC7       | -1.830617896 | 6.784581092 | 5.27E-19 | 2.03E-18 | 32.2553762 |
| RBM47       | -1.063788046 | 5.49440584  | 5.43E-19 | 2.09E-18 | 32.2243553 |
| C1orf52     | -1.404847628 | 4.861622276 | 5.52E-19 | 2.12E-18 | 32.208554  |
| WTAP        | -1.01142892  | 5.816541426 | 5.60E-19 | 2.15E-18 | 32.1934878 |
| NGLY1       | -1.154995248 | 7.147129085 | 5.95E-19 | 2.28E-18 | 32.1331451 |
| RAB14       | -1.078059426 | 5.796348441 | 5.98E-19 | 2.29E-18 | 32.1287852 |
| MTHFD2      | -1.085978168 | 4.326173109 | 6.35E-19 | 2.43E-18 | 32.0688341 |
| GNPDA2      | -1.066766276 | 3.714513773 | 6.40E-19 | 2.45E-18 | 32.0603498 |
| PDHX        | -1.274355666 | 4.589902331 | 6.41E-19 | 2.46E-18 | 32.0587866 |
| NDFIP1      | -1.556110698 | 6.160309819 | 6.41E-19 | 2.46E-18 | 32.058228  |
| TCF7L2      | -1.006501432 | 5.912758724 | 6.44E-19 | 2.47E-18 | 32.0541277 |
| N4BP2L2     | -1.452698167 | 6.476461599 | 6.51E-19 | 2.49E-18 | 32.0433079 |
| PCED1B-AS1  | -1.163382455 | 6.755765435 | 6.65E-19 | 2.54E-18 | 32.0220063 |
| RAB11A      | -1.45827599  | 5.879292755 | 6.80E-19 | 2.60E-18 | 31.999224  |
| ZYX         | -1.223998816 | 8.725195418 | 6.96E-19 | 2.66E-18 | 31.9769797 |
| MAGT1       | -1.20753536  | 6.382142323 | 7.13E-19 | 2.72E-18 | 31.9520684 |
| GPD1L       | -1.126479118 | 6.17707081  | 7.26E-19 | 2.77E-18 | 31.933943  |
| ZNF14       | -1.243771469 | 4.309051755 | 7.43E-19 | 2.83E-18 | 31.9115258 |
| METTL23     | -1.534517131 | 6.671416531 | 7.45E-19 | 2.84E-18 | 31.9088872 |
| WDFY1       | -1.354577657 | 6.073396306 | 7.49E-19 | 2.85E-18 | 31.9029273 |
| MSMO1       | -1.810404509 | 4.673022679 | 7.63E-19 | 2.90E-18 | 31.885175  |
| AMPD3       | -1.430892555 | 6.716588664 | 7.96E-19 | 3.03E-18 | 31.8423577 |
| IKBIP       | -1.554948973 | 4.509411268 | 8.44E-19 | 3.20E-18 | 31.7842663 |
| HNRNPA0     | -1.042286866 | 5.814179477 | 8.55E-19 | 3.25E-18 | 31.7704396 |
| KIAA0232    | -1.546163344 | 6.06327031  | 8.55E-19 | 3.25E-18 | 31.7703266 |
| DPYSL2      | -1.680740216 | 6.986160225 | 9.30E-19 | 3.53E-18 | 31.6864649 |
| ZC3H12D     | -1.474522072 | 6.077417443 | 1.03E-18 | 3.87E-18 | 31.5885551 |
| OSTC        | -1.826981911 | 6.544020085 | 1.03E-18 | 3.88E-18 | 31.5852776 |
| LYSMD3      | -2.234617319 | 4.752140433 | 1.04E-18 | 3.90E-18 | 31.5799067 |
| SEC31A      | -1.081131103 | 7.500942245 | 1.11E-18 | 4.19E-18 | 31.5056672 |
| ANKRD12     | -1.594332269 | 4.527954402 | 1.14E-18 | 4.27E-18 | 31.4868997 |
| IL10RA      | -1.335014318 | 8.351004897 | 1.17E-18 | 4.38E-18 | 31.4594998 |
| L3MBTL3     | -1.154669251 | 5.029308902 | 1.19E-18 | 4.48E-18 | 31.4369816 |
| DCP2        | -1.064939237 | 5.813092119 | 1.22E-18 | 4.58E-18 | 31.4149125 |
| FKBP11      | -1.022167185 | 6.644732771 | 1.26E-18 | 4.72E-18 | 31.3827884 |
| ABCE1       | -1.823789175 | 4.254959309 | 1.27E-18 | 4.74E-18 | 31.3779839 |
| ABHD13      | -1.125759548 | 2.863079065 | 1.29E-18 | 4.82E-18 | 31.3601429 |
| PAM         | -1.45847384  | 5.310924202 | 1.37E-18 | 5.11E-18 | 31.3006782 |
| ARPP19      | -1.340579934 | 5.710525871 | 1.40E-18 | 5.23E-18 | 31.2769232 |
| ITGAE       | -1.282426423 | 6.393840262 | 1.48E-18 | 5.52E-18 | 31.2234891 |
| EGLN1       | -1.378775495 | 5.88142275  | 1.48E-18 | 5.53E-18 | 31.220939  |
| SECTM1      | -1.185573997 | 9.478509831 | 1.50E-18 | 5.59E-18 | 31.2106195 |
| FAM217B     | -1.991479431 | 5.258472039 | 1.52E-18 | 5.68E-18 | 31.1927238 |
| TBC1D15     | -1.300494583 | 4.116163538 | 1.58E-18 | 5.88E-18 | 31.1577765 |
| CYP11B2     | 1.210528012  | 5.804098099 | 1.59E-18 | 5.92E-18 | 31.1515366 |
| BBIP1       | -1.063224866 | 5.714497317 | 1.65E-18 | 6.14E-18 | 31.1142867 |
| PRIM1       | -1.106515727 | 5.352664996 | 1.67E-18 | 6.20E-18 | 31.1042528 |

|           |              |             |          |          |            |
|-----------|--------------|-------------|----------|----------|------------|
| FAM200B   | -1.031651937 | 4.932521564 | 1.68E-18 | 6.25E-18 | 31.0956108 |
| ARMC10    | -1.098871744 | 5.376158795 | 1.70E-18 | 6.30E-18 | 31.0862427 |
| UBR1      | -1.243478108 | 4.69878915  | 1.71E-18 | 6.35E-18 | 31.0782821 |
| BCAS2     | -1.476637795 | 5.497466077 | 1.84E-18 | 6.81E-18 | 31.0060148 |
| WDR36     | -1.037943248 | 4.17697074  | 1.86E-18 | 6.88E-18 | 30.9951116 |
| HLTF      | -1.944779653 | 4.52073652  | 1.86E-18 | 6.89E-18 | 30.9937559 |
| PEX11B    | -1.217653083 | 6.709987229 | 1.86E-18 | 6.90E-18 | 30.9918067 |
| RBBP8     | -1.136909121 | 4.227593949 | 1.87E-18 | 6.92E-18 | 30.9896461 |
| TP53BP2   | -1.218844186 | 4.658782649 | 1.89E-18 | 7.00E-18 | 30.9772879 |
| MRPL34    | -1.229899426 | 5.586507341 | 1.96E-18 | 7.25E-18 | 30.9403339 |
| NMD3      | -1.093962491 | 4.231809154 | 1.98E-18 | 7.33E-18 | 30.9296683 |
| ZFR       | -1.136430225 | 5.25618114  | 2.03E-18 | 7.51E-18 | 30.9049546 |
| ATG14     | -1.317076334 | 5.792594453 | 2.05E-18 | 7.58E-18 | 30.8950849 |
| DOCK10    | -1.388180636 | 5.336546156 | 2.05E-18 | 7.58E-18 | 30.8950039 |
| RECQL     | -1.599972056 | 5.423597085 | 2.10E-18 | 7.72E-18 | 30.8747488 |
| SCAF8     | -2.083906536 | 5.944094323 | 2.10E-18 | 7.72E-18 | 30.8747424 |
| PRKX      | -1.28825605  | 5.328359937 | 2.11E-18 | 7.76E-18 | 30.8695764 |
| MAP4K5    | -1.313418679 | 4.023575687 | 2.13E-18 | 7.86E-18 | 30.8566048 |
| PLEKHF2   | -2.353212307 | 4.825745585 | 2.24E-18 | 8.23E-18 | 30.8084652 |
| MOSPD2    | -1.17933754  | 6.92904414  | 2.26E-18 | 8.32E-18 | 30.7974401 |
| ZHX2      | -1.063304326 | 6.238679047 | 2.29E-18 | 8.39E-18 | 30.7884326 |
| CTR9      | -1.783451681 | 6.227730641 | 2.34E-18 | 8.59E-18 | 30.7643778 |
| WIPF1     | -1.307816957 | 7.06253649  | 2.36E-18 | 8.65E-18 | 30.7572834 |
| C14orf119 | -1.022051766 | 7.402681381 | 2.39E-18 | 8.78E-18 | 30.7415005 |
| CXorf40A  | -1.047162097 | 6.739856198 | 2.42E-18 | 8.85E-18 | 30.7331464 |
| POGLUT1   | -1.278568823 | 5.665670286 | 2.47E-18 | 9.04E-18 | 30.7118985 |
| AP5M1     | -1.169544745 | 4.854726001 | 2.48E-18 | 9.07E-18 | 30.7081444 |
| OGFRL1    | -1.79313233  | 6.628276944 | 2.48E-18 | 9.07E-18 | 30.7075082 |
| STK17B    | -1.51147477  | 5.971360526 | 2.49E-18 | 9.12E-18 | 30.7016811 |
| PIGK      | -1.1073033   | 3.518499035 | 2.49E-18 | 9.12E-18 | 30.7016401 |
| FCGRT     | -1.02428148  | 8.778752776 | 2.52E-18 | 9.22E-18 | 30.6912582 |
| ZNF140    | -1.530396538 | 3.819840598 | 2.69E-18 | 9.81E-18 | 30.6270392 |
| ZNF776    | -1.660819465 | 5.140153736 | 2.75E-18 | 1.01E-17 | 30.6015632 |
| RTN1      | -1.385119172 | 6.072678923 | 2.79E-18 | 1.02E-17 | 30.5899382 |
| AMN1      | -1.224682093 | 4.798934197 | 2.86E-18 | 1.04E-17 | 30.5656762 |
| KRBOX4    | -1.086977675 | 4.18443708  | 2.86E-18 | 1.04E-17 | 30.5642651 |
| PPAPDC1B  | -1.064163671 | 5.299193647 | 2.91E-18 | 1.06E-17 | 30.5469333 |
| SGMS1     | -1.870690331 | 3.087202432 | 2.92E-18 | 1.06E-17 | 30.544755  |
| ZNF708    | -1.110902116 | 3.370479314 | 3.01E-18 | 1.09E-17 | 30.5122853 |
| HNRNPA2B1 | -1.34287587  | 6.592017399 | 3.11E-18 | 1.13E-17 | 30.4814396 |
| OSTM1     | -1.394120843 | 4.895792516 | 3.20E-18 | 1.16E-17 | 30.4507567 |
| AK090844  | -1.262111207 | 6.386378237 | 3.22E-18 | 1.17E-17 | 30.4466611 |
| NFATC2IP  | -1.319267403 | 7.105106665 | 3.23E-18 | 1.17E-17 | 30.4426845 |
| METAP1    | -1.276690821 | 6.361485018 | 3.26E-18 | 1.18E-17 | 30.4333611 |
| USP47     | -1.026696    | 4.531617994 | 3.37E-18 | 1.22E-17 | 30.3996609 |
| RIT1      | -1.45324823  | 5.061947249 | 3.38E-18 | 1.22E-17 | 30.3980854 |
| SPCS3     | -1.002667492 | 6.054027105 | 3.41E-18 | 1.23E-17 | 30.389352  |
| MAP3K7    | -1.483919871 | 5.137720396 | 3.43E-18 | 1.24E-17 | 30.3820809 |
| CXCL1     | -1.023415873 | 5.097037704 | 3.51E-18 | 1.27E-17 | 30.3606942 |
| SUDS3     | -1.309541923 | 4.979336636 | 3.57E-18 | 1.29E-17 | 30.3417672 |
| CAPN7     | -1.534317552 | 3.688904434 | 3.96E-18 | 1.43E-17 | 30.2378259 |
| UHRF2     | -1.90523989  | 7.022555215 | 4.08E-18 | 1.47E-17 | 30.2083611 |
| EIF3C     | -1.183562864 | 3.601446008 | 4.12E-18 | 1.48E-17 | 30.2003871 |
| DPP8      | -1.072006643 | 6.785698442 | 4.15E-18 | 1.49E-17 | 30.1930964 |
| TRMT11    | -1.271624036 | 3.369205391 | 4.16E-18 | 1.49E-17 | 30.189811  |
| CNBP      | -1.335240171 | 7.60214318  | 4.21E-18 | 1.51E-17 | 30.1788651 |
| NOTCH2    | -1.093015318 | 7.423194999 | 4.34E-18 | 1.56E-17 | 30.1466347 |
| CCDC69    | -1.457526934 | 7.464273406 | 4.41E-18 | 1.58E-17 | 30.1308588 |

|              |              |             |          |          |            |
|--------------|--------------|-------------|----------|----------|------------|
| C1D          | -2.227472773 | 5.238661588 | 4.51E-18 | 1.61E-17 | 30.1090428 |
| ZMYM1        | -1.24524741  | 3.292890556 | 4.51E-18 | 1.62E-17 | 30.1083073 |
| ZNF644       | -1.465844292 | 3.370040093 | 4.67E-18 | 1.67E-17 | 30.0741711 |
| TSPAN13      | -1.578819621 | 5.278005836 | 4.79E-18 | 1.71E-17 | 30.0482596 |
| RUNX1-IT1    | -1.288023732 | 7.734208344 | 4.86E-18 | 1.74E-17 | 30.0345072 |
| ASF1A        | -1.938384457 | 4.604268937 | 4.88E-18 | 1.74E-17 | 30.0298405 |
| TRIP4        | -1.141674631 | 6.205386832 | 4.98E-18 | 1.78E-17 | 30.0100231 |
| IL32         | -1.492566814 | 8.493269592 | 5.18E-18 | 1.85E-17 | 29.9709343 |
| RAB18        | -1.112016264 | 5.82424628  | 5.23E-18 | 1.86E-17 | 29.9617515 |
| RALA         | -1.126077184 | 5.93001581  | 5.26E-18 | 1.87E-17 | 29.9547384 |
| BNIP3        | -1.204353958 | 4.50009811  | 5.29E-18 | 1.88E-17 | 29.9494087 |
| RRM2B        | -2.281471474 | 4.567717137 | 5.33E-18 | 1.90E-17 | 29.9426893 |
| VIMP         | -1.528666239 | 6.37407129  | 5.44E-18 | 1.94E-17 | 29.9212084 |
| C2orf69      | -1.840938055 | 5.018969636 | 5.47E-18 | 1.94E-17 | 29.9168881 |
| SLC39A10     | -1.947981644 | 4.781137475 | 5.54E-18 | 1.97E-17 | 29.9038946 |
| UBL3         | -1.835535282 | 5.532320124 | 5.56E-18 | 1.98E-17 | 29.8996528 |
| BAG3         | -1.424502904 | 5.964842983 | 6.11E-18 | 2.16E-17 | 29.8052813 |
| DAZAP2       | -1.300884074 | 7.854315438 | 6.18E-18 | 2.19E-17 | 29.7935211 |
| NAAA         | -1.017529634 | 6.976007767 | 6.20E-18 | 2.19E-17 | 29.7908507 |
| MOB4         | -1.295142447 | 5.617582914 | 6.25E-18 | 2.21E-17 | 29.7825252 |
| CTD-2293H3.1 | -1.00361267  | 4.807163759 | 6.48E-18 | 2.29E-17 | 29.7471655 |
| DYRK2        | -1.314994892 | 5.700938444 | 6.91E-18 | 2.44E-17 | 29.6828713 |
| SLC25A24     | -1.169387679 | 4.521112707 | 7.17E-18 | 2.53E-17 | 29.6461771 |
| CSTF2T       | -1.088824557 | 4.920712019 | 7.18E-18 | 2.53E-17 | 29.6449706 |
| NMT2         | -1.433299268 | 5.277008233 | 7.35E-18 | 2.59E-17 | 29.6217    |
| RRM1         | -1.108349452 | 5.412947664 | 7.42E-18 | 2.61E-17 | 29.6110474 |
| TMEM263      | -1.892200185 | 3.931102447 | 7.70E-18 | 2.71E-17 | 29.5746261 |
| TRMT13       | -1.595846552 | 5.385907799 | 7.86E-18 | 2.76E-17 | 29.5541021 |
| TCEAL4       | -1.283803994 | 4.714689252 | 8.05E-18 | 2.82E-17 | 29.5307702 |
| TMEM2        | -1.257210661 | 5.83091331  | 8.10E-18 | 2.84E-17 | 29.5245366 |
| SMA4         | -1.362786113 | 5.650376196 | 8.13E-18 | 2.85E-17 | 29.5205823 |
| RTCA         | -1.083675015 | 4.746036338 | 8.23E-18 | 2.88E-17 | 29.5081817 |
| CEP57        | -1.33867789  | 4.371711855 | 8.45E-18 | 2.96E-17 | 29.4820251 |
| TMEM33       | -1.185911529 | 5.529091663 | 8.50E-18 | 2.97E-17 | 29.4763849 |
| PPIP5K2      | -2.414616003 | 4.419885303 | 8.55E-18 | 2.99E-17 | 29.4696393 |
| ATXN2        | -1.072506634 | 6.338301437 | 8.72E-18 | 3.05E-17 | 29.4498271 |
| RTN3         | -1.093981271 | 8.848324025 | 8.73E-18 | 3.05E-17 | 29.4489338 |
| UFL1         | -1.074458048 | 4.115357433 | 8.83E-18 | 3.08E-17 | 29.4376803 |
| UBP1         | -1.911396741 | 5.996548816 | 8.90E-18 | 3.11E-17 | 29.4294502 |
| MGC24103     | -1.163465138 | 3.131606957 | 8.92E-18 | 3.11E-17 | 29.4282447 |
| MGC12488     | -1.179356568 | 3.308611567 | 9.25E-18 | 3.23E-17 | 29.3911393 |
| MINPP1       | -1.297211182 | 3.311990693 | 9.39E-18 | 3.27E-17 | 29.3764314 |
| FAM198B      | -1.370200402 | 4.532427464 | 9.60E-18 | 3.35E-17 | 29.3538502 |
| PREX1        | -1.139066907 | 8.467620438 | 1.13E-17 | 3.92E-17 | 29.1924327 |
| PAXIP1       | -1.266650461 | 5.121410755 | 1.13E-17 | 3.92E-17 | 29.1903541 |
| AMMECR1L     | -1.469525668 | 5.606158178 | 1.17E-17 | 4.04E-17 | 29.1594893 |
| CD36         | -1.023720382 | 6.141693744 | 1.18E-17 | 4.07E-17 | 29.1523554 |
| STIM2        | -1.010313103 | 5.193612556 | 1.21E-17 | 4.20E-17 | 29.1199531 |
| NCK2         | -1.258737666 | 7.324127388 | 1.24E-17 | 4.27E-17 | 29.1015104 |
| LOC102724356 | -1.677715516 | 7.198308541 | 1.27E-17 | 4.38E-17 | 29.0763091 |
| SMIM3        | -1.288947206 | 6.383384409 | 1.30E-17 | 4.47E-17 | 29.0546271 |
| STARD7       | -1.276184743 | 8.137174955 | 1.30E-17 | 4.49E-17 | 29.0504403 |
| NKAP         | -1.018258684 | 5.015243515 | 1.33E-17 | 4.60E-17 | 29.0253122 |
| ZDHHC6       | -1.147550798 | 6.42557681  | 1.35E-17 | 4.65E-17 | 29.0131105 |
| RAB9A        | -1.383520732 | 5.418656759 | 1.37E-17 | 4.71E-17 | 28.9990506 |
| TMX1         | -1.716826166 | 4.974549562 | 1.38E-17 | 4.75E-17 | 28.9899687 |
| OXR1         | -1.023794079 | 3.923412156 | 1.40E-17 | 4.80E-17 | 28.9788302 |
| ID2          | -1.034577262 | 8.090457181 | 1.40E-17 | 4.82E-17 | 28.9762547 |

|              |              |             |          |          |            |
|--------------|--------------|-------------|----------|----------|------------|
| ACOT9        | -1.091088343 | 6.985897347 | 1.42E-17 | 4.87E-17 | 28.9635466 |
| EIF2S3       | -1.29512614  | 7.576168355 | 1.47E-17 | 5.04E-17 | 28.928402  |
| HSP90AB1     | -1.295387836 | 7.524010415 | 1.62E-17 | 5.52E-17 | 28.8346202 |
| ANKRD20A11P  | -1.027637984 | 6.152332005 | 1.64E-17 | 5.61E-17 | 28.8169435 |
| MAST3        | -1.039551583 | 7.23350717  | 1.66E-17 | 5.66E-17 | 28.8074652 |
| CDK17        | -1.209063746 | 4.696320341 | 1.72E-17 | 5.86E-17 | 28.7717399 |
| HSDL2        | -1.015711888 | 5.408532835 | 1.75E-17 | 5.97E-17 | 28.7536606 |
| LOC100996425 | 1.004744762  | 5.605626955 | 1.79E-17 | 6.08E-17 | 28.7346659 |
| PNN          | -1.19264672  | 6.054440585 | 1.86E-17 | 6.33E-17 | 28.6937676 |
| RP11-468E2.5 | -1.239203219 | 6.005734766 | 1.90E-17 | 6.47E-17 | 28.6703219 |
| RNF146       | -1.5269836   | 5.14455416  | 1.94E-17 | 6.58E-17 | 28.6536211 |
| INTS2        | -1.198447861 | 3.436341252 | 1.95E-17 | 6.62E-17 | 28.6473305 |
| PCED1B       | -1.334870141 | 7.695006552 | 2.04E-17 | 6.93E-17 | 28.5992475 |
| ZDHHC17      | -1.498226318 | 4.65283623  | 2.04E-17 | 6.93E-17 | 28.5991755 |
| MAP2K4       | -1.365943362 | 5.743231223 | 2.05E-17 | 6.94E-17 | 28.598413  |
| SYPL1        | -1.519083975 | 6.419762631 | 2.09E-17 | 7.08E-17 | 28.5769368 |
| HMGNA4       | -1.575984871 | 7.898850376 | 2.10E-17 | 7.12E-17 | 28.5706765 |
| MRPL13       | -1.181110518 | 3.582439252 | 2.18E-17 | 7.38E-17 | 28.5344029 |
| HNRNPA3      | -1.476008629 | 6.918442719 | 2.35E-17 | 7.93E-17 | 28.4618309 |
| DERA         | -1.59166819  | 5.120806324 | 2.40E-17 | 8.12E-17 | 28.4377597 |
| LCK          | -1.294202873 | 8.398636159 | 2.43E-17 | 8.21E-17 | 28.4260888 |
| KIAA0247     | -1.516095385 | 8.201736374 | 2.49E-17 | 8.39E-17 | 28.4021017 |
| ND6          | 1.11645689   | 7.750892002 | 2.65E-17 | 8.90E-17 | 28.3408942 |
| TLR4         | -1.698099329 | 5.871510483 | 2.67E-17 | 8.96E-17 | 28.3338298 |
| G3BP2        | -1.260857667 | 5.486147905 | 3.01E-17 | 1.01E-16 | 28.2128818 |
| NAT1         | -1.63007085  | 4.059007696 | 3.08E-17 | 1.03E-16 | 28.1899223 |
| SNAP23       | -1.520103709 | 6.755874355 | 3.14E-17 | 1.05E-16 | 28.1722795 |
| RASA1        | -2.04786476  | 4.838882581 | 3.14E-17 | 1.05E-16 | 28.1692904 |
| CBX1         | -1.615644739 | 6.097798247 | 3.17E-17 | 1.06E-16 | 28.1606911 |
| P2RY10       | -1.421666603 | 5.593698506 | 3.26E-17 | 1.09E-16 | 28.1346057 |
| BRI3BP       | -1.957814942 | 5.969916602 | 3.27E-17 | 1.09E-16 | 28.1294667 |
| CUTC         | -1.149756712 | 5.417612319 | 3.28E-17 | 1.09E-16 | 28.1284317 |
| CELF2        | -1.036792827 | 8.296035694 | 3.31E-17 | 1.11E-16 | 28.1181335 |
| SSR1         | -1.216122826 | 7.086944958 | 3.38E-17 | 1.13E-16 | 28.0959652 |
| SRSF3        | -1.108641139 | 5.611456878 | 3.50E-17 | 1.17E-16 | 28.0630988 |
| TOB1         | -2.72008222  | 5.542093503 | 3.67E-17 | 1.22E-16 | 28.0149446 |
| GOLPH3       | -1.884153081 | 6.891290115 | 3.75E-17 | 1.25E-16 | 27.994727  |
| GNAZ         | -1.024835714 | 6.481916647 | 3.97E-17 | 1.32E-16 | 27.9370803 |
| LENG8        | -1.372229489 | 6.77689757  | 4.12E-17 | 1.37E-16 | 27.8988814 |
| ACBD3        | -1.131343288 | 5.422666266 | 4.17E-17 | 1.38E-16 | 27.8868801 |
| RC3H1        | -1.156592007 | 6.321624233 | 4.24E-17 | 1.41E-16 | 27.8705465 |
| SH2D3C       | -1.004479032 | 6.957563234 | 4.38E-17 | 1.45E-16 | 27.8384615 |
| LOC283357    | -1.735539023 | 4.845737574 | 4.40E-17 | 1.46E-16 | 27.832692  |
| AGA          | -1.093906455 | 4.889240969 | 4.47E-17 | 1.48E-16 | 27.8174867 |
| CLEC12B      | -1.115751517 | 3.101067217 | 4.50E-17 | 1.49E-16 | 27.811525  |
| MRPS35       | -1.27119918  | 6.023791232 | 4.55E-17 | 1.50E-16 | 27.8009265 |
| PSIP1        | -1.317913577 | 5.591648242 | 4.55E-17 | 1.50E-16 | 27.8008524 |
| CYB5R4       | -1.288691676 | 4.742700604 | 4.56E-17 | 1.51E-16 | 27.7975682 |
| SSB          | -1.128200909 | 5.377268047 | 4.71E-17 | 1.56E-16 | 27.7650565 |
| FAM13B       | -1.524185843 | 6.033461844 | 4.78E-17 | 1.58E-16 | 27.7502959 |
| C14orf142    | -1.09477864  | 3.609839437 | 5.02E-17 | 1.65E-16 | 27.7014392 |
| BTG1         | -1.013651106 | 7.796647833 | 5.03E-17 | 1.66E-16 | 27.6995535 |
| STXBP3       | -1.320395894 | 5.705958914 | 5.09E-17 | 1.68E-16 | 27.6875216 |
| LINC00657    | -1.331558162 | 6.215224527 | 5.18E-17 | 1.70E-16 | 27.6702372 |
| CXXC5        | -1.031006203 | 7.236409564 | 5.23E-17 | 1.72E-16 | 27.6609049 |
| TOP2B        | -1.583688044 | 7.457587073 | 5.24E-17 | 1.72E-16 | 27.6587925 |
| SUMO1        | -1.039998434 | 5.869238185 | 5.35E-17 | 1.76E-16 | 27.6382491 |
| ADAM10       | -2.026517137 | 5.317715729 | 5.48E-17 | 1.80E-16 | 27.6144051 |

|              |              |             |          |          |            |
|--------------|--------------|-------------|----------|----------|------------|
| KLHL8        | -1.082501128 | 5.642885787 | 5.50E-17 | 1.80E-16 | 27.610136  |
| CBX3         | -1.22886959  | 5.859739117 | 5.58E-17 | 1.83E-16 | 27.5969169 |
| ARL14EP      | -1.251036081 | 5.373067899 | 5.73E-17 | 1.88E-16 | 27.5708855 |
| ICE1         | -1.885044156 | 5.100437199 | 5.78E-17 | 1.89E-16 | 27.5621941 |
| JADE1        | -1.024492715 | 5.79733015  | 5.84E-17 | 1.91E-16 | 27.5517097 |
| MARCKSL1     | -1.177776867 | 8.224230619 | 6.08E-17 | 1.99E-16 | 27.510138  |
| BZW2         | -1.018096348 | 6.854509331 | 6.41E-17 | 2.09E-16 | 27.4575803 |
| SERINC5      | -1.727322237 | 7.088705599 | 6.43E-17 | 2.10E-16 | 27.4551475 |
| CNOT6        | -1.439635479 | 5.331178336 | 6.43E-17 | 2.10E-16 | 27.4551094 |
| PYHIN1       | -1.290719224 | 5.504615012 | 6.58E-17 | 2.14E-16 | 27.4325054 |
| ZZZ3         | -1.07256104  | 4.966266001 | 6.60E-17 | 2.15E-16 | 27.4290295 |
| SENP6        | -1.368087235 | 3.813929169 | 6.79E-17 | 2.21E-16 | 27.4006343 |
| HGS          | -1.053994879 | 6.068070656 | 7.02E-17 | 2.29E-16 | 27.367019  |
| DENND5A      | -1.462300725 | 8.186224955 | 7.31E-17 | 2.38E-16 | 27.3271846 |
| SEC24B       | -2.151270357 | 5.929259255 | 7.50E-17 | 2.44E-16 | 27.301259  |
| MAPRE1       | -1.121087105 | 7.423982395 | 7.58E-17 | 2.46E-16 | 27.2905425 |
| SOAT1        | -1.095188356 | 5.895318127 | 7.74E-17 | 2.51E-16 | 27.2698256 |
| HSPA13       | -1.374671368 | 3.400169816 | 7.81E-17 | 2.53E-16 | 27.2609485 |
| IFIH1        | -1.129449083 | 3.723033365 | 8.16E-17 | 2.64E-16 | 27.2167239 |
| RAF1         | -1.096912061 | 8.194235097 | 8.35E-17 | 2.70E-16 | 27.1936122 |
| RASSF5       | -1.308851492 | 8.283015418 | 8.40E-17 | 2.72E-16 | 27.1882343 |
| BEX5         | -1.048722081 | 4.595466164 | 8.48E-17 | 2.74E-16 | 27.178754  |
| TRAM1        | -1.312675062 | 6.581192506 | 8.49E-17 | 2.75E-16 | 27.1770953 |
| FAIM3        | -1.342641382 | 8.844678248 | 8.61E-17 | 2.78E-16 | 27.163383  |
| DMTF1        | -1.9622879   | 5.819974201 | 8.80E-17 | 2.84E-16 | 27.1421656 |
| EBAG9        | -1.241409767 | 5.205925299 | 8.83E-17 | 2.85E-16 | 27.138114  |
| GBE1         | -1.360285267 | 5.778151885 | 9.00E-17 | 2.90E-16 | 27.1195823 |
| LXN          | -1.14760373  | 5.534153407 | 9.11E-17 | 2.94E-16 | 27.1068496 |
| IL6R         | -1.004114341 | 8.010395247 | 9.26E-17 | 2.99E-16 | 27.0907515 |
| TARDBP       | -1.33727537  | 7.222438639 | 9.47E-17 | 3.05E-16 | 27.0683085 |
| SEC23A       | -1.383538087 | 4.679481309 | 9.83E-17 | 3.16E-16 | 27.0310875 |
| CD247        | -1.418986281 | 9.150064205 | 9.88E-17 | 3.18E-16 | 27.0260949 |
| CCNG2        | -1.3679951   | 5.37493155  | 1.03E-16 | 3.32E-16 | 26.9804567 |
| KLF6         | -1.003983828 | 8.368442625 | 1.04E-16 | 3.35E-16 | 26.9709592 |
| SKIV2L2      | -1.054982694 | 4.875084661 | 1.05E-16 | 3.37E-16 | 26.9656314 |
| NUDT21       | -1.345846005 | 4.199793261 | 1.09E-16 | 3.49E-16 | 26.9294567 |
| RP11-124L9.5 | -1.656904396 | 4.192352232 | 1.14E-16 | 3.65E-16 | 26.8848906 |
| ZNF117       | -1.089642664 | 3.389595105 | 1.17E-16 | 3.73E-16 | 26.860349  |
| GALC         | -1.189593496 | 5.171770093 | 1.17E-16 | 3.74E-16 | 26.8581313 |
| TMEM230      | -1.574305059 | 7.121181714 | 1.17E-16 | 3.75E-16 | 26.8560504 |
| ATP6AP2      | -1.064987398 | 6.849865467 | 1.23E-16 | 3.93E-16 | 26.8071256 |
| CTB-167B5.2  | -2.643644897 | 4.832618833 | 1.27E-16 | 4.06E-16 | 26.7735346 |
| KDM3A        | -1.176879144 | 4.548754979 | 1.29E-16 | 4.12E-16 | 26.7577761 |
| SUMO4        | -1.076528158 | 7.221532619 | 1.30E-16 | 4.14E-16 | 26.7529238 |
| PTGER4       | -1.609348503 | 5.747160665 | 1.37E-16 | 4.37E-16 | 26.6981403 |
| MGME1        | -1.475974467 | 5.953957071 | 1.40E-16 | 4.44E-16 | 26.6811775 |
| KPNA3        | -1.23779154  | 6.471085327 | 1.42E-16 | 4.50E-16 | 26.6663252 |
| SNX6         | -1.260579662 | 7.749107351 | 1.42E-16 | 4.51E-16 | 26.664611  |
| RBM5         | -1.061005174 | 7.454771425 | 1.45E-16 | 4.62E-16 | 26.6409961 |
| YTHDF3       | -1.772563071 | 5.090463512 | 1.48E-16 | 4.69E-16 | 26.625191  |
| RSRC2        | -1.089513422 | 6.938081031 | 1.50E-16 | 4.77E-16 | 26.6078705 |
| DGKA         | -1.01242937  | 7.602478531 | 1.51E-16 | 4.79E-16 | 26.6031127 |
| SGK1         | -2.009237783 | 7.492347686 | 1.52E-16 | 4.82E-16 | 26.5962544 |
| LMBRD1       | -1.607172622 | 6.320745795 | 1.55E-16 | 4.92E-16 | 26.5753683 |
| TBC1D4       | -1.759388591 | 5.201974464 | 1.56E-16 | 4.93E-16 | 26.5719449 |
| CAMK4        | -1.147359161 | 5.150720094 | 1.57E-16 | 4.98E-16 | 26.5629667 |
| LINC01003    | -1.789604765 | 5.799898364 | 1.57E-16 | 4.98E-16 | 26.5620112 |
| TRAC         | -1.179575926 | 9.472329052 | 1.60E-16 | 5.07E-16 | 26.5432713 |

|           |              |             |          |          |            |
|-----------|--------------|-------------|----------|----------|------------|
| TMEM14C   | -1.802645334 | 5.827233835 | 1.68E-16 | 5.30E-16 | 26.4980543 |
| TMEM30A   | -1.973321938 | 5.246528981 | 1.68E-16 | 5.32E-16 | 26.4935463 |
| ETS1      | -1.100121579 | 6.119059523 | 1.74E-16 | 5.49E-16 | 26.4617867 |
| MED6      | -1.226993004 | 5.551637835 | 1.81E-16 | 5.70E-16 | 26.4213488 |
| BEX2      | -1.009237863 | 5.688954828 | 1.84E-16 | 5.78E-16 | 26.4066001 |
| CEP192    | -1.382677307 | 4.030660238 | 1.89E-16 | 5.93E-16 | 26.380912  |
| NIPSNAP3A | -2.106955166 | 3.896508334 | 1.90E-16 | 5.99E-16 | 26.3710821 |
| CREB1     | -1.1534687   | 6.573464397 | 1.91E-16 | 5.99E-16 | 26.3707909 |
| GIMAP6    | -1.648926587 | 7.391412631 | 1.91E-16 | 6.01E-16 | 26.3666917 |
| SIRT1     | -1.95674928  | 5.244542603 | 1.94E-16 | 6.11E-16 | 26.3510193 |
| WDR92     | -1.165310149 | 5.741312536 | 1.95E-16 | 6.13E-16 | 26.3475691 |
| TANK      | -1.142310523 | 5.866302285 | 2.07E-16 | 6.48E-16 | 26.29035   |
| CCDC28A   | -1.366053765 | 7.312651124 | 2.07E-16 | 6.50E-16 | 26.2861942 |
| DSC1      | -1.199320201 | 3.712947991 | 2.11E-16 | 6.62E-16 | 26.2678813 |
| ZBTB1     | -1.298697475 | 3.527739138 | 2.11E-16 | 6.62E-16 | 26.2671751 |
| ORC4      | -1.165614923 | 4.84903641  | 2.17E-16 | 6.81E-16 | 26.2385717 |
| CCR2      | -1.620417    | 6.078603229 | 2.22E-16 | 6.94E-16 | 26.2192375 |
| BC047651  | -1.618563714 | 4.213345584 | 2.22E-16 | 6.96E-16 | 26.216813  |
| BCLAF1    | -1.264758073 | 5.531303723 | 2.27E-16 | 7.10E-16 | 26.1954195 |
| C2orf47   | -1.181281053 | 5.383585807 | 2.33E-16 | 7.27E-16 | 26.1711858 |
| MAT2B     | -1.040410486 | 6.304202423 | 2.38E-16 | 7.45E-16 | 26.1467918 |
| USP14     | -1.131214263 | 6.785169638 | 2.44E-16 | 7.61E-16 | 26.1243453 |
| HMGCR     | -1.530439966 | 4.932351051 | 2.52E-16 | 7.84E-16 | 26.0935672 |
| ITGA4     | -2.113414504 | 4.795231576 | 2.52E-16 | 7.85E-16 | 26.0928338 |
| NRIP1     | -1.612986998 | 5.708047239 | 2.52E-16 | 7.85E-16 | 26.0924436 |
| CARKD     | -1.065897748 | 6.51415753  | 2.55E-16 | 7.93E-16 | 26.080784  |
| HLA-DPB1  | -1.056091569 | 7.354651871 | 2.56E-16 | 7.97E-16 | 26.076724  |
| RAB8B     | -1.644526836 | 6.019369375 | 2.57E-16 | 8.00E-16 | 26.0717167 |
| THEM4     | -1.108079094 | 5.696905083 | 2.60E-16 | 8.09E-16 | 26.0600561 |
| MIB1      | -1.363575584 | 4.43597616  | 2.62E-16 | 8.16E-16 | 26.0513212 |
| TM9SF3    | -1.066199452 | 5.263547276 | 2.67E-16 | 8.29E-16 | 26.0351275 |
| CXCR2     | -1.614549782 | 9.623725078 | 2.74E-16 | 8.51E-16 | 26.0075549 |
| DDX1      | -1.167599881 | 6.414128232 | 2.82E-16 | 8.75E-16 | 25.9789611 |
| RAD23B    | -1.310575807 | 5.540110678 | 2.85E-16 | 8.83E-16 | 25.9702421 |
| ABHD5     | -1.253940448 | 5.841648531 | 2.89E-16 | 8.97E-16 | 25.954148  |
| AKAP11    | -1.48559193  | 5.930921715 | 2.89E-16 | 8.97E-16 | 25.9537496 |
| ZBTB21    | -1.384595977 | 4.622206522 | 3.18E-16 | 9.83E-16 | 25.860768  |
| SMAP1     | -1.336481125 | 7.050171182 | 3.19E-16 | 9.85E-16 | 25.8578977 |
| PRPS2     | -1.25712485  | 4.539935192 | 3.25E-16 | 1.01E-15 | 25.8371983 |
| SLC37A3   | -1.383870306 | 4.833829553 | 3.33E-16 | 1.03E-15 | 25.812106  |
| ZFP36     | -1.208169451 | 9.104167598 | 3.34E-16 | 1.03E-15 | 25.8107633 |
| SESN1     | -1.003848501 | 5.322568782 | 3.39E-16 | 1.05E-15 | 25.7966289 |
| RPA3OS    | -1.319452277 | 3.512890219 | 3.43E-16 | 1.06E-15 | 25.7830264 |
| RHOA      | -1.111905661 | 7.53546146  | 3.51E-16 | 1.08E-15 | 25.7612373 |
| SNX2      | -1.188374842 | 5.076210211 | 3.55E-16 | 1.09E-15 | 25.750277  |
| GPCPD1    | -1.323987674 | 6.256372289 | 3.58E-16 | 1.10E-15 | 25.7400867 |
| RASGRP1   | -1.894222372 | 6.929740953 | 3.60E-16 | 1.11E-15 | 25.7363393 |
| PI4KA     | -1.057703222 | 6.616083074 | 3.70E-16 | 1.14E-15 | 25.7096303 |
| CAPZA2    | -1.577231348 | 5.524947162 | 3.71E-16 | 1.14E-15 | 25.706357  |
| GOLGA4    | -1.102206621 | 6.067973912 | 3.79E-16 | 1.17E-15 | 25.6840116 |
| ANXA5     | -1.176907564 | 8.52572489  | 3.87E-16 | 1.19E-15 | 25.6645817 |
| C6orf120  | -1.875214881 | 4.870228531 | 3.93E-16 | 1.21E-15 | 25.649302  |
| P2RX7     | -1.037132676 | 5.354161676 | 3.95E-16 | 1.21E-15 | 25.6431244 |
| NR3C1     | -1.24035705  | 8.087026713 | 4.03E-16 | 1.24E-15 | 25.6232358 |
| RWDD4     | -1.330513008 | 4.175233522 | 4.06E-16 | 1.25E-15 | 25.6150998 |
| ATRX      | -1.390031706 | 5.73005946  | 4.14E-16 | 1.27E-15 | 25.5959686 |
| FCHO2     | -1.245028126 | 3.594518643 | 4.21E-16 | 1.29E-15 | 25.5785138 |
| KMT2E     | -1.391531113 | 7.42508505  | 4.37E-16 | 1.34E-15 | 25.5424547 |



|              |              |             |          |          |            |
|--------------|--------------|-------------|----------|----------|------------|
| TM6SF1       | -1.897450184 | 6.18450635  | 4.67E-16 | 1.43E-15 | 25.476309  |
| AC068039.4   | -1.036036348 | 4.992695688 | 5.05E-16 | 1.54E-15 | 25.3980172 |
| SMC4         | -1.021380276 | 4.01125572  | 5.48E-16 | 1.67E-15 | 25.31591   |
| GHITM        | -1.172670874 | 7.467887173 | 5.53E-16 | 1.68E-15 | 25.3077985 |
| RP11-469M7.1 | -1.027038692 | 4.50652512  | 5.54E-16 | 1.68E-15 | 25.3062821 |
| SMIM15       | -2.420996681 | 4.297087282 | 5.62E-16 | 1.71E-15 | 25.2919587 |
| IRF2BPL      | -1.244986014 | 7.969387631 | 5.75E-16 | 1.74E-15 | 25.2691627 |
| CLNS1A       | -1.007841827 | 6.820371589 | 5.86E-16 | 1.78E-15 | 25.2500243 |
| FGFR1OP2     | -1.29889731  | 5.013977901 | 5.91E-16 | 1.79E-15 | 25.240871  |
| TSPAN2       | -1.308797683 | 4.3803211   | 6.01E-16 | 1.82E-15 | 25.2243776 |
| RMI1         | -1.445038046 | 5.166976675 | 6.05E-16 | 1.83E-15 | 25.2182266 |
| KIAA1279     | -1.279170203 | 4.498959476 | 6.07E-16 | 1.84E-15 | 25.2139221 |
| TOMM20       | -1.499194679 | 7.142968925 | 6.10E-16 | 1.85E-15 | 25.2088296 |
| ZNF146       | -1.091714631 | 4.931386412 | 6.12E-16 | 1.86E-15 | 25.2055779 |
| IER3IP1      | -1.007687967 | 4.524717665 | 6.19E-16 | 1.87E-15 | 25.1946692 |
| LRRC25       | -1.019109176 | 8.286323793 | 6.48E-16 | 1.96E-15 | 25.1486929 |
| DARS         | -1.047618302 | 5.302282544 | 6.99E-16 | 2.11E-15 | 25.0734064 |
| CCNH         | -1.226824905 | 6.024912769 | 7.50E-16 | 2.26E-15 | 25.0037162 |
| MTMR6        | -1.336131647 | 4.129756706 | 7.53E-16 | 2.27E-15 | 24.999095  |
| SDHD         | -1.286275177 | 6.732126207 | 7.54E-16 | 2.27E-15 | 24.9978231 |
| TMEM69       | -1.34681473  | 6.497839405 | 7.78E-16 | 2.34E-15 | 24.9667254 |
| TIMM9        | -1.037906199 | 5.160821239 | 8.02E-16 | 2.41E-15 | 24.9365368 |
| ZYG11B       | -1.152118661 | 6.304007721 | 8.35E-16 | 2.51E-15 | 24.896031  |
| CSF3R        | -1.191162498 | 9.802228565 | 8.36E-16 | 2.51E-15 | 24.8956086 |
| ACBD5        | -1.133763984 | 4.298538661 | 8.40E-16 | 2.52E-15 | 24.8898314 |
| LIPT1        | -1.359673135 | 5.017807354 | 8.98E-16 | 2.69E-15 | 24.8242523 |
| FAM206A      | -1.081310015 | 5.874434971 | 9.04E-16 | 2.70E-15 | 24.817201  |
| GSAP         | -2.313831261 | 5.512456568 | 9.27E-16 | 2.77E-15 | 24.7920733 |
| VIM          | -1.147777734 | 7.796024715 | 9.44E-16 | 2.82E-15 | 24.7737735 |
| AC079767.4   | -1.003596407 | 3.88349483  | 9.48E-16 | 2.83E-15 | 24.7694643 |
| SEN7         | -1.140412594 | 3.019298546 | 1.00E-15 | 2.98E-15 | 24.7149123 |
| TMEM126B     | -1.069622181 | 4.375182084 | 1.01E-15 | 3.01E-15 | 24.7077961 |
| RHOT1        | -1.185736351 | 6.156474956 | 1.02E-15 | 3.05E-15 | 24.6918475 |
| KLF10        | -2.118818153 | 5.717747301 | 1.03E-15 | 3.07E-15 | 24.6858207 |
| PTER         | -1.377276354 | 5.420332362 | 1.05E-15 | 3.13E-15 | 24.6654228 |
| UGP2         | -1.054434043 | 6.643084731 | 1.06E-15 | 3.15E-15 | 24.6600306 |
| RCN2         | -1.333679272 | 4.485586312 | 1.11E-15 | 3.28E-15 | 24.6159014 |
| BTN3A3       | -1.238434458 | 6.380467125 | 1.15E-15 | 3.40E-15 | 24.5798705 |
| ZNF195       | -1.29365101  | 4.114034642 | 1.21E-15 | 3.57E-15 | 24.5301754 |
| MICU2        | -2.534034323 | 5.451823236 | 1.21E-15 | 3.57E-15 | 24.5300186 |
| ERGIC2       | -1.165804842 | 4.923745972 | 1.25E-15 | 3.69E-15 | 24.4962843 |
| SLK          | -1.823388629 | 5.834667558 | 1.28E-15 | 3.80E-15 | 24.468555  |
| SLBP         | -1.943871363 | 6.551125216 | 1.29E-15 | 3.82E-15 | 24.4631312 |
| ACSL3        | -1.515609366 | 4.701909669 | 1.30E-15 | 3.86E-15 | 24.451603  |
| FPR2         | -1.74707528  | 6.788851349 | 1.31E-15 | 3.87E-15 | 24.4483925 |
| LRRC47       | -1.217933406 | 6.77262932  | 1.37E-15 | 4.03E-15 | 24.4053275 |
| SLU7         | -1.327250435 | 5.75648808  | 1.38E-15 | 4.06E-15 | 24.3985563 |
| ABHD3        | -2.374610334 | 6.385651543 | 1.39E-15 | 4.09E-15 | 24.3909046 |
| UBE2G1       | -1.476031018 | 6.269063313 | 1.40E-15 | 4.12E-15 | 24.383388  |
| NUFIP2       | -1.137628514 | 6.828610114 | 1.51E-15 | 4.44E-15 | 24.3073456 |
| GOLGA5       | -1.271089673 | 6.123525954 | 1.52E-15 | 4.47E-15 | 24.2984377 |
| USO1         | -1.147042404 | 6.157022707 | 1.55E-15 | 4.54E-15 | 24.282376  |
| ANKRD27      | -1.504753219 | 5.967990155 | 1.56E-15 | 4.58E-15 | 24.2732532 |
| NDUFAB1      | -1.076750134 | 7.796394619 | 1.57E-15 | 4.61E-15 | 24.265926  |
| C7orf60      | -2.143858782 | 4.222453621 | 1.57E-15 | 4.61E-15 | 24.2651614 |
| COPB1        | -1.059896951 | 7.319612036 | 1.61E-15 | 4.73E-15 | 24.2399751 |
| PABPN1       | -1.262837959 | 7.07106377  | 1.62E-15 | 4.74E-15 | 24.237972  |
| TBC1D10C     | -1.073825247 | 8.255502501 | 1.67E-15 | 4.89E-15 | 24.2047619 |

|              |              |             |          |          |            |
|--------------|--------------|-------------|----------|----------|------------|
| EBPL         | -1.274589337 | 6.163733804 | 1.69E-15 | 4.95E-15 | 24.1935507 |
| LCOR         | -1.591063428 | 6.021931654 | 1.72E-15 | 5.03E-15 | 24.1760877 |
| POLR2B       | -1.127840481 | 5.618779908 | 1.76E-15 | 5.14E-15 | 24.1527422 |
| TRG-AS1      | -1.323511674 | 7.637704941 | 1.87E-15 | 5.45E-15 | 24.0935361 |
| PDCD6IP      | -1.127585135 | 6.782867664 | 1.90E-15 | 5.55E-15 | 24.0741482 |
| DDHD2        | -1.708108722 | 4.757695495 | 1.93E-15 | 5.61E-15 | 24.0628344 |
| LINC00597    | -1.00034031  | 3.595549296 | 1.93E-15 | 5.62E-15 | 24.061441  |
| LOC101927451 | -1.138024351 | 6.526853205 | 1.93E-15 | 5.63E-15 | 24.058787  |
| ZNF121       | -1.451799998 | 5.656243299 | 1.96E-15 | 5.72E-15 | 24.0434028 |
| FKBP5        | -1.331011507 | 6.946174436 | 2.08E-15 | 6.03E-15 | 23.9883475 |
| EIF4E3       | -1.317845491 | 5.698276066 | 2.11E-15 | 6.14E-15 | 23.9710182 |
| KANSL2       | -1.299422068 | 5.525538879 | 2.18E-15 | 6.33E-15 | 23.9392422 |
| CCDC109B     | -1.132757459 | 7.289174161 | 2.24E-15 | 6.49E-15 | 23.913852  |
| ITK          | -2.163062585 | 7.811720152 | 2.34E-15 | 6.78E-15 | 23.8689418 |
| C1GALT1      | -1.031021317 | 5.170939347 | 2.39E-15 | 6.93E-15 | 23.8455738 |
| MORC3        | -2.131237371 | 5.15253599  | 2.41E-15 | 6.97E-15 | 23.8406279 |
| CD8A         | -1.336474618 | 7.602163668 | 2.41E-15 | 6.99E-15 | 23.8372602 |
| RP5-1074L1.4 | -1.446050088 | 4.904033661 | 2.48E-15 | 7.19E-15 | 23.8088947 |
| SATB1        | -1.362919028 | 7.024308827 | 2.56E-15 | 7.41E-15 | 23.777337  |
| TEP1         | -1.126688697 | 5.848438699 | 2.62E-15 | 7.57E-15 | 23.7558283 |
| PTGS2        | -1.715324497 | 4.158732789 | 2.65E-15 | 7.65E-15 | 23.745619  |
| IPO7         | -1.26910958  | 6.038483612 | 2.66E-15 | 7.69E-15 | 23.7394303 |
| TMEM106B     | -1.132385095 | 5.442784223 | 2.67E-15 | 7.70E-15 | 23.737884  |
| CRLF3        | -1.716354398 | 8.302157552 | 2.69E-15 | 7.76E-15 | 23.7302415 |
| CES1P1       | 1.05917341   | 4.52121293  | 2.71E-15 | 7.81E-15 | 23.7233199 |
| YTHDF2       | -1.094362881 | 7.409322717 | 2.74E-15 | 7.92E-15 | 23.709573  |
| FBXO33       | -1.294851424 | 5.875241761 | 2.78E-15 | 8.02E-15 | 23.6963887 |
| ZFAND1       | -1.39301667  | 3.754880051 | 2.82E-15 | 8.13E-15 | 23.6822169 |
| GPRASP1      | -1.341289143 | 4.991122008 | 2.88E-15 | 8.28E-15 | 23.6627952 |
| ACAP2        | -1.161188991 | 5.545452232 | 2.90E-15 | 8.34E-15 | 23.6553399 |
| SLC20A1      | -1.084822174 | 8.189332835 | 3.06E-15 | 8.80E-15 | 23.5997757 |
| BST1         | -1.310793384 | 5.946400227 | 3.18E-15 | 9.13E-15 | 23.56295   |
| MANBA        | -1.016949536 | 6.379056978 | 3.22E-15 | 9.24E-15 | 23.550241  |
| FAM60A       | -1.019769805 | 5.868309973 | 3.25E-15 | 9.32E-15 | 23.5419935 |
| TBC1D23      | -1.457335694 | 5.589824919 | 3.41E-15 | 9.78E-15 | 23.4925824 |
| H3F3A        | 1.276118942  | 6.185309908 | 3.48E-15 | 9.96E-15 | 23.4730965 |
| UPF2         | -1.424957231 | 6.071319038 | 3.50E-15 | 1.00E-14 | 23.4661885 |
| LY75         | -2.372412608 | 6.092216861 | 3.52E-15 | 1.01E-14 | 23.461241  |
| HSD17B7      | -1.126529749 | 6.681719275 | 3.56E-15 | 1.02E-14 | 23.4508096 |
| KIR2DS2      | -1.131595587 | 4.582664506 | 3.67E-15 | 1.05E-14 | 23.4192435 |
| OXCT1        | -1.249749546 | 5.219839244 | 3.67E-15 | 1.05E-14 | 23.4187665 |
| FBXL3        | -1.366078953 | 5.67132278  | 3.75E-15 | 1.07E-14 | 23.3993298 |
| PIGP         | -1.062682047 | 6.173103661 | 3.83E-15 | 1.09E-14 | 23.3776854 |
| LAX1         | -1.180697272 | 6.851701612 | 3.94E-15 | 1.12E-14 | 23.3491329 |
| PIK3R1       | -1.256016659 | 6.5452385   | 3.96E-15 | 1.13E-14 | 23.3433058 |
| THEMIS2      | -1.00747353  | 8.99130059  | 4.19E-15 | 1.19E-14 | 23.2873357 |
| UCHL3        | -1.248188756 | 5.512302946 | 4.30E-15 | 1.23E-14 | 23.2607772 |
| IFRD1        | -1.475418563 | 4.924376979 | 4.32E-15 | 1.23E-14 | 23.2576966 |
| MRFAP1L1     | -1.860080847 | 6.046384489 | 4.44E-15 | 1.26E-14 | 23.2310249 |
| TRIM52       | -1.20173645  | 5.880872069 | 4.55E-15 | 1.29E-14 | 23.2060827 |
| HERPUD2      | -1.26438571  | 7.368222016 | 4.85E-15 | 1.38E-14 | 23.1428011 |
| ARID4A       | -1.593262454 | 4.455970265 | 4.91E-15 | 1.39E-14 | 23.1295912 |
| DPY19L3      | -1.743865433 | 4.751057448 | 4.95E-15 | 1.40E-14 | 23.1211735 |
| EHBP1L1      | -1.004037645 | 6.692575933 | 4.96E-15 | 1.41E-14 | 23.1191143 |
| PCNA         | -1.226364716 | 6.550150306 | 5.08E-15 | 1.44E-14 | 23.0956626 |
| ST8SIA4      | -1.472951042 | 4.787106428 | 5.18E-15 | 1.47E-14 | 23.0761954 |
| RTN4         | -1.046392562 | 8.841261165 | 5.22E-15 | 1.48E-14 | 23.0694538 |
| VRK1         | -1.213601245 | 3.950718931 | 5.31E-15 | 1.50E-14 | 23.0509433 |

|              |              |             |          |          |            |
|--------------|--------------|-------------|----------|----------|------------|
| CCNC         | -1.068549219 | 4.113020448 | 5.33E-15 | 1.51E-14 | 23.0477753 |
| DPH3         | -1.439149593 | 5.144352022 | 5.42E-15 | 1.53E-14 | 23.0308471 |
| PRKAR1A      | -1.591129906 | 7.538676719 | 5.86E-15 | 1.65E-14 | 22.9533202 |
| ASNSD1       | -1.446302315 | 5.992319234 | 6.07E-15 | 1.71E-14 | 22.9176931 |
| SEC22B       | -1.35615612  | 7.482679857 | 6.08E-15 | 1.71E-14 | 22.9164126 |
| CCDC91       | -1.759956968 | 4.506822629 | 6.58E-15 | 1.85E-14 | 22.8373326 |
| LYPLA1       | -1.876791126 | 6.554904806 | 7.54E-15 | 2.11E-14 | 22.7018214 |
| SON          | -1.118680778 | 7.734697144 | 7.67E-15 | 2.15E-14 | 22.6853699 |
| LIMK2        | -1.006604143 | 6.889152209 | 7.82E-15 | 2.19E-14 | 22.6653957 |
| FUNDC1       | -1.297425394 | 4.066900887 | 8.00E-15 | 2.24E-14 | 22.6426154 |
| VAMP3        | -1.265927212 | 7.593813588 | 8.07E-15 | 2.26E-14 | 22.634147  |
| BC045784     | -1.074591507 | 3.942940978 | 8.14E-15 | 2.27E-14 | 22.6264169 |
| RANBP6       | -1.739623359 | 3.878762547 | 8.44E-15 | 2.35E-14 | 22.5900342 |
| HNRNPD       | -1.01154545  | 6.018298506 | 8.60E-15 | 2.40E-14 | 22.5711021 |
| VEZF1        | -1.11183922  | 7.057497721 | 9.63E-15 | 2.68E-14 | 22.4578957 |
| CDC42SE2     | -1.67070593  | 6.624531844 | 9.98E-15 | 2.77E-14 | 22.4230496 |
| UBE2Q2       | -2.311157258 | 5.066039739 | 1.02E-14 | 2.83E-14 | 22.4016341 |
| RP11-97C16.1 | -1.502099579 | 4.730982754 | 1.05E-14 | 2.92E-14 | 22.3696992 |
| KLRG1        | -1.274600356 | 7.285632077 | 1.06E-14 | 2.95E-14 | 22.3600002 |
| CLK4         | -1.160349829 | 4.427054648 | 1.10E-14 | 3.04E-14 | 22.3273333 |
| CCL4         | -1.057993359 | 7.455738004 | 1.11E-14 | 3.06E-14 | 22.3201372 |
| NARS         | -1.338350928 | 8.095422015 | 1.12E-14 | 3.09E-14 | 22.3116037 |
| TRMT61B      | -1.319840311 | 4.522299578 | 1.13E-14 | 3.13E-14 | 22.2990003 |
| IKZF3        | -1.037688351 | 5.716619926 | 1.14E-14 | 3.16E-14 | 22.2858517 |
| SACM1L       | -2.372715738 | 6.639108424 | 1.17E-14 | 3.23E-14 | 22.2658773 |
| MOB1A        | -1.543017498 | 7.310953716 | 1.19E-14 | 3.29E-14 | 22.2449242 |
| WWP1         | -1.214530335 | 5.638437793 | 1.21E-14 | 3.34E-14 | 22.2311949 |
| DNMT1        | -1.046564902 | 7.18077918  | 1.24E-14 | 3.41E-14 | 22.2097832 |
| ABI1         | -1.285549042 | 5.384144038 | 1.26E-14 | 3.48E-14 | 22.1879727 |
| FRAT2        | -1.164199911 | 9.288436799 | 1.28E-14 | 3.53E-14 | 22.1744195 |
| BTBD1        | -1.581752588 | 5.936848576 | 1.28E-14 | 3.53E-14 | 22.1723869 |
| PELI1        | -1.504341762 | 7.865923979 | 1.32E-14 | 3.62E-14 | 22.1472682 |
| C16orf72     | -1.516269006 | 6.323115381 | 1.37E-14 | 3.78E-14 | 22.1039261 |
| SMNDC1       | -1.934397638 | 6.421662248 | 1.39E-14 | 3.82E-14 | 22.0911037 |
| DMXL1        | -1.314386001 | 5.003402339 | 1.41E-14 | 3.88E-14 | 22.0766562 |
| DNAJA2       | -1.090748611 | 5.874664895 | 1.46E-14 | 3.99E-14 | 22.0458289 |
| STK17A       | -1.005229326 | 5.606827219 | 1.49E-14 | 4.09E-14 | 22.0200821 |
| KRCC1        | -1.477168872 | 5.011134515 | 1.51E-14 | 4.14E-14 | 22.0073116 |
| HMGN3        | -1.699564447 | 6.941899552 | 1.54E-14 | 4.21E-14 | 21.9913163 |
| LPIN2        | -1.089409023 | 7.617618556 | 1.60E-14 | 4.36E-14 | 21.9544009 |
| MAP3K1       | -1.249657214 | 6.724560307 | 1.78E-14 | 4.85E-14 | 21.8447567 |
| BZW1         | -2.12544427  | 6.208483096 | 1.78E-14 | 4.86E-14 | 21.8435142 |
| PRPF4B       | -1.782107066 | 5.578297331 | 1.80E-14 | 4.89E-14 | 21.8370642 |
| ATP6V1B2     | -1.245997971 | 9.879335718 | 1.82E-14 | 4.96E-14 | 21.822826  |
| DRAM2        | -1.380855145 | 5.495136184 | 1.84E-14 | 5.01E-14 | 21.8122563 |
| TXK          | -2.289382581 | 5.626031293 | 1.96E-14 | 5.32E-14 | 21.7495486 |
| PPP6C        | -1.025177125 | 7.082257686 | 2.07E-14 | 5.61E-14 | 21.6957177 |
| CUL4A        | -1.00459641  | 6.089197855 | 2.12E-14 | 5.75E-14 | 21.6708985 |
| LOC101060691 | -1.281214275 | 5.116849549 | 2.14E-14 | 5.80E-14 | 21.6619542 |
| CD164        | -1.800520345 | 7.047877568 | 2.19E-14 | 5.92E-14 | 21.6413626 |
| LOC100190986 | -1.831955342 | 7.284603475 | 2.24E-14 | 6.04E-14 | 21.6191837 |
| OSCAR        | -1.017653252 | 6.236365362 | 2.28E-14 | 6.15E-14 | 21.6010824 |
| STX3         | -1.047688415 | 6.607775798 | 2.37E-14 | 6.39E-14 | 21.5621752 |
| WAPAL        | -1.056275689 | 5.157674999 | 2.37E-14 | 6.40E-14 | 21.5607717 |
| POLE3        | -1.21521683  | 6.62826893  | 2.56E-14 | 6.89E-14 | 21.4855729 |
| STARD3NL     | -1.471294948 | 5.757064146 | 2.61E-14 | 7.02E-14 | 21.4648861 |
| HMGN1        | -1.294659787 | 8.539448572 | 2.70E-14 | 7.27E-14 | 21.4300887 |
| NRROS        | -1.012608725 | 6.457436657 | 2.70E-14 | 7.27E-14 | 21.4293283 |

|               |              |             |          |          |            |
|---------------|--------------|-------------|----------|----------|------------|
| ANKRD55       | -1.127904938 | 5.547312364 | 2.79E-14 | 7.48E-14 | 21.3999756 |
| MMGT1         | -1.116485477 | 7.005667102 | 2.80E-14 | 7.52E-14 | 21.3952661 |
| SCP2          | -1.580421875 | 6.71201789  | 2.89E-14 | 7.76E-14 | 21.3625114 |
| PDZD8         | -1.054121228 | 3.906290153 | 2.91E-14 | 7.81E-14 | 21.3555411 |
| ENTPD1        | -1.099679631 | 5.83037787  | 3.05E-14 | 8.16E-14 | 21.3109733 |
| TSNAX         | -2.213289059 | 4.786526112 | 3.22E-14 | 8.60E-14 | 21.2560803 |
| RHOBTB1       | -1.001705173 | 3.295003837 | 3.27E-14 | 8.74E-14 | 21.2401418 |
| NPTN          | -2.461078185 | 7.487744029 | 3.28E-14 | 8.75E-14 | 21.2382961 |
| SMAP2         | -1.079860225 | 10.21800127 | 3.30E-14 | 8.81E-14 | 21.2309749 |
| CDKN1B        | -1.812966436 | 7.963191046 | 3.48E-14 | 9.29E-14 | 21.1772466 |
| TOPORS        | -1.59583995  | 6.135538793 | 3.62E-14 | 9.62E-14 | 21.1404333 |
| MS4A1         | -1.910311684 | 6.237170921 | 3.64E-14 | 9.70E-14 | 21.1323874 |
| ERAP2         | -1.12607136  | 4.489466788 | 3.73E-14 | 9.92E-14 | 21.1094487 |
| ARL8B         | -1.499109356 | 6.396428842 | 3.75E-14 | 9.97E-14 | 21.1042942 |
| TIPARP        | -1.29844332  | 6.197084761 | 3.88E-14 | 1.03E-13 | 21.0704341 |
| ITM2B         | -1.230364917 | 11.50894492 | 3.91E-14 | 1.04E-13 | 21.0614014 |
| PPP4R1        | -1.514833955 | 7.768298774 | 4.05E-14 | 1.07E-13 | 21.0262957 |
| CCBL2         | -1.202037828 | 6.502409007 | 4.12E-14 | 1.09E-13 | 21.0106436 |
| XRN2          | -1.109806649 | 6.538095163 | 4.18E-14 | 1.11E-13 | 20.9949339 |
| FYB           | -1.047237049 | 7.627827111 | 4.35E-14 | 1.15E-13 | 20.9554985 |
| LOC101928893  | -1.465138523 | 3.004321452 | 4.52E-14 | 1.19E-13 | 20.9182354 |
| CRNKL1        | -1.735675566 | 5.009727331 | 4.55E-14 | 1.20E-13 | 20.9121993 |
| CNTNAP3       | -1.144666393 | 2.869879872 | 4.79E-14 | 1.26E-13 | 20.8593419 |
| FAR1          | -1.693572776 | 4.997956353 | 4.88E-14 | 1.29E-13 | 20.8408655 |
| MRPL32        | -1.151796853 | 5.565167439 | 4.88E-14 | 1.29E-13 | 20.8408623 |
| ARRDC3        | -2.142247002 | 6.104309778 | 4.90E-14 | 1.29E-13 | 20.8385015 |
| OSBPL9        | -1.307983296 | 7.132150731 | 4.92E-14 | 1.29E-13 | 20.8341397 |
| EPS15         | -1.503587554 | 6.305902602 | 4.92E-14 | 1.30E-13 | 20.8333037 |
| C4BPA         | -1.124937338 | 5.32806559  | 5.22E-14 | 1.37E-13 | 20.7744448 |
| DEGS1         | -1.113683389 | 7.277381022 | 5.38E-14 | 1.41E-13 | 20.7445933 |
| RAB33B        | -1.582607008 | 4.198286095 | 5.42E-14 | 1.42E-13 | 20.7372197 |
| CMC2          | -1.109275219 | 5.671446048 | 5.92E-14 | 1.55E-13 | 20.6486022 |
| FAM118A       | -1.149725934 | 5.423761939 | 6.07E-14 | 1.59E-13 | 20.6243822 |
| TRAPPC10      | -1.018382501 | 7.396603017 | 6.23E-14 | 1.63E-13 | 20.5982616 |
| LEMD3         | -1.563827831 | 6.226840819 | 6.27E-14 | 1.64E-13 | 20.591555  |
| C1QBP         | -1.2778636   | 6.045650204 | 6.32E-14 | 1.65E-13 | 20.5835145 |
| TM9SF2        | -1.399268928 | 8.714610994 | 6.34E-14 | 1.66E-13 | 20.5814356 |
| TTC19         | -1.382647588 | 6.055761414 | 6.58E-14 | 1.72E-13 | 20.5439234 |
| GOLT1B        | -1.398498328 | 4.966164093 | 6.91E-14 | 1.80E-13 | 20.4951628 |
| FASTKD1       | -1.326094599 | 5.106936538 | 7.09E-14 | 1.85E-13 | 20.4693891 |
| TNFAIP8       | -1.604573524 | 6.040404393 | 7.22E-14 | 1.88E-13 | 20.4512141 |
| TMEM87B       | -1.258718596 | 4.882581149 | 7.28E-14 | 1.89E-13 | 20.4431266 |
| DDX26B        | -1.344203877 | 4.793157876 | 7.35E-14 | 1.91E-13 | 20.4342723 |
| HIST2H2BE     | -1.282643712 | 6.423224745 | 7.73E-14 | 2.00E-13 | 20.3835467 |
| PAPD4         | -1.221004731 | 6.563502995 | 7.78E-14 | 2.02E-13 | 20.3767958 |
| NAP1L1        | -1.304931512 | 7.195344763 | 8.06E-14 | 2.09E-13 | 20.3424635 |
| CHUK          | -1.480070042 | 4.694329695 | 8.17E-14 | 2.12E-13 | 20.3281079 |
| UBE4A         | -1.520749069 | 7.38115946  | 8.23E-14 | 2.13E-13 | 20.321794  |
| CLEC5A        | -1.081895252 | 3.951800614 | 8.26E-14 | 2.14E-13 | 20.3178924 |
| CTD-3092A11.2 | -1.312879255 | 4.680087697 | 8.31E-14 | 2.15E-13 | 20.3111385 |
| GPR18         | -1.303014974 | 6.757886188 | 8.44E-14 | 2.18E-13 | 20.2960479 |
| GDI2          | -1.299603766 | 7.897657601 | 8.45E-14 | 2.18E-13 | 20.2953383 |
| RP11-158G18.1 | -1.528140852 | 6.621011124 | 8.81E-14 | 2.27E-13 | 20.2539164 |
| OAT           | -1.622739128 | 6.339882875 | 8.96E-14 | 2.31E-13 | 20.2365036 |
| MAN2A1        | -1.435778079 | 6.119785508 | 8.97E-14 | 2.31E-13 | 20.2358943 |
| ANAPC4        | -1.188780675 | 6.293833121 | 9.79E-14 | 2.52E-13 | 20.1484351 |
| AP3S1         | -1.469114919 | 7.313051762 | 1.02E-13 | 2.61E-13 | 20.1125036 |
| CREBL2        | -1.230933868 | 6.233794068 | 1.02E-13 | 2.62E-13 | 20.1061929 |

|              |              |             |          |          |            |
|--------------|--------------|-------------|----------|----------|------------|
| EIF5         | -1.041420968 | 6.72290254  | 1.13E-13 | 2.90E-13 | 20.0036514 |
| GTF2H2B      | -1.192116938 | 5.736697101 | 1.14E-13 | 2.92E-13 | 19.9971255 |
| PRKRIR       | -1.766553076 | 5.847736056 | 1.15E-13 | 2.93E-13 | 19.992044  |
| PTPLB        | -1.20162208  | 5.210561255 | 1.16E-13 | 2.96E-13 | 19.9818199 |
| UHMK1        | -1.201423668 | 6.663207451 | 1.19E-13 | 3.05E-13 | 19.9508721 |
| HIF1A        | -1.764645431 | 8.421727738 | 1.20E-13 | 3.07E-13 | 19.9442127 |
| RCSD1        | -1.070508758 | 8.009124854 | 1.22E-13 | 3.11E-13 | 19.9298944 |
| RALB         | -1.045446916 | 7.936989378 | 1.23E-13 | 3.15E-13 | 19.9176769 |
| 15-Sep       | -1.633289757 | 8.296563018 | 1.23E-13 | 3.15E-13 | 19.9176234 |
| YWHAQ        | -1.647796104 | 7.631541155 | 1.25E-13 | 3.19E-13 | 19.9042256 |
| UBE2E1       | -1.826392446 | 6.930278859 | 1.27E-13 | 3.23E-13 | 19.8920254 |
| ZNF101       | -1.161456047 | 6.200556344 | 1.36E-13 | 3.47E-13 | 19.8189605 |
| IFNGR2       | -1.008917782 | 9.04597727  | 1.37E-13 | 3.48E-13 | 19.81584   |
| ANKRD44      | -1.03639879  | 5.814873478 | 1.42E-13 | 3.62E-13 | 19.7759669 |
| AGTPBP1      | -1.215696395 | 5.985814399 | 1.42E-13 | 3.62E-13 | 19.7756306 |
| PCBP1        | -1.005325729 | 9.301336315 | 1.43E-13 | 3.64E-13 | 19.7693811 |
| DTX3L        | -1.029798795 | 8.612002268 | 1.45E-13 | 3.68E-13 | 19.7584165 |
| A2M-AS1      | -1.987697282 | 6.346792502 | 1.46E-13 | 3.69E-13 | 19.7533255 |
| SERTAD2      | -1.046819348 | 7.478458041 | 1.52E-13 | 3.87E-13 | 19.7073633 |
| AP1S2        | -1.131384525 | 7.11518163  | 1.56E-13 | 3.95E-13 | 19.6859156 |
| PPP2R5E      | -1.081335928 | 6.344652466 | 1.58E-13 | 4.00E-13 | 19.6738405 |
| COPS5        | -1.04486277  | 6.085081239 | 1.58E-13 | 4.01E-13 | 19.6707272 |
| ADRB2        | -1.176693657 | 6.88629708  | 1.58E-13 | 4.01E-13 | 19.6697455 |
| AZIN1        | -1.692106187 | 5.942670558 | 1.59E-13 | 4.02E-13 | 19.6673434 |
| SPDYE2       | -1.289239988 | 6.628417486 | 1.63E-13 | 4.11E-13 | 19.6437475 |
| LOC100127972 | -1.32998887  | 6.632135199 | 1.69E-13 | 4.27E-13 | 19.6050156 |
| FOXN2        | -1.053217018 | 5.040861439 | 1.72E-13 | 4.34E-13 | 19.586882  |
| SNORA21      | -1.205338634 | 5.731498486 | 1.87E-13 | 4.72E-13 | 19.5035456 |
| CHRM3-AS2    | -1.485616792 | 4.977991873 | 1.88E-13 | 4.73E-13 | 19.5012431 |
| PAG1         | -1.228671792 | 7.061559629 | 1.88E-13 | 4.75E-13 | 19.4965032 |
| OXNAD1       | -1.079373538 | 6.541913902 | 2.06E-13 | 5.18E-13 | 19.4067439 |
| GPR34        | -1.068260277 | 4.102750558 | 2.15E-13 | 5.41E-13 | 19.3633938 |
| PNMA1        | -1.348358512 | 5.695876102 | 2.20E-13 | 5.52E-13 | 19.3433802 |
| ITGAV        | -1.454340434 | 3.653676354 | 2.20E-13 | 5.53E-13 | 19.34138   |
| STAT1        | -1.133388402 | 7.352666441 | 2.25E-13 | 5.65E-13 | 19.3190372 |
| RBM39        | -1.047334765 | 6.882772007 | 2.28E-13 | 5.71E-13 | 19.3076918 |
| ITGAM        | -1.006780307 | 7.866417626 | 2.31E-13 | 5.79E-13 | 19.2938075 |
| ATP10D       | -1.614172121 | 5.81324972  | 2.35E-13 | 5.87E-13 | 19.2788798 |
| NAIP         | -1.106151955 | 6.675950321 | 2.37E-13 | 5.92E-13 | 19.270226  |
| GPBP1        | -1.776753885 | 5.971523237 | 2.37E-13 | 5.93E-13 | 19.2686799 |
| BOD1L1       | -1.052038773 | 6.162733626 | 2.44E-13 | 6.09E-13 | 19.2407123 |
| PAN3         | -1.637060556 | 7.475503885 | 2.45E-13 | 6.13E-13 | 19.2348996 |
| KLF3         | -1.070227274 | 6.027861366 | 2.47E-13 | 6.16E-13 | 19.2283521 |
| CHMP2B       | -1.23757048  | 5.841114216 | 2.48E-13 | 6.19E-13 | 19.2244203 |
| GNA13        | -1.295578043 | 5.53520946  | 2.57E-13 | 6.41E-13 | 19.1875736 |
| BLNK         | -1.654061412 | 5.523266631 | 2.62E-13 | 6.53E-13 | 19.1684218 |
| WRB          | -1.314303432 | 5.252889847 | 2.66E-13 | 6.63E-13 | 19.1538406 |
| NUP107       | -1.28666735  | 5.495822336 | 2.67E-13 | 6.65E-13 | 19.1507127 |
| HEXB         | -1.218887288 | 8.128322236 | 2.69E-13 | 6.70E-13 | 19.1429515 |
| ZMPSTE24     | -1.575848682 | 6.825123    | 2.75E-13 | 6.85E-13 | 19.1193619 |
| LYRM5        | -1.192371519 | 5.749633897 | 2.85E-13 | 7.08E-13 | 19.0859673 |
| MGC57346     | -1.088318285 | 3.951419477 | 2.95E-13 | 7.32E-13 | 19.0513371 |
| EID1         | -1.166693994 | 5.720340533 | 2.98E-13 | 7.41E-13 | 19.0391727 |
| TRAT1        | -1.71040553  | 5.040726938 | 3.15E-13 | 7.80E-13 | 18.9868706 |
| TM2D3        | -1.619140822 | 6.812620839 | 3.33E-13 | 8.25E-13 | 18.928862  |
| ARGLU1       | -1.013439592 | 5.504113413 | 3.34E-13 | 8.27E-13 | 18.9270659 |
| C16orf54     | -1.005879194 | 9.475166659 | 3.35E-13 | 8.29E-13 | 18.9243999 |
| CX3CR1       | -1.072254853 | 8.816558089 | 3.49E-13 | 8.61E-13 | 18.8848965 |

|               |              |             |          |          |            |
|---------------|--------------|-------------|----------|----------|------------|
| FGFBP2        | -1.716166771 | 7.273404907 | 3.51E-13 | 8.67E-13 | 18.8778132 |
| ATP6V1A       | -1.45058491  | 8.118454516 | 3.57E-13 | 8.82E-13 | 18.860219  |
| ADNP          | -1.205387433 | 6.238144692 | 3.59E-13 | 8.86E-13 | 18.8549999 |
| PMS2P5        | -2.006626771 | 5.483866992 | 3.68E-13 | 9.06E-13 | 18.8320574 |
| TBC1D9        | -1.021441239 | 5.285517912 | 3.72E-13 | 9.17E-13 | 18.8197366 |
| H1FX          | -1.152031504 | 6.972655833 | 3.85E-13 | 9.47E-13 | 18.7862558 |
| ZNF652        | -1.075326697 | 7.587660083 | 3.90E-13 | 9.58E-13 | 18.7738181 |
| CXCR4         | -1.528437302 | 9.032381365 | 4.06E-13 | 9.97E-13 | 18.7339054 |
| F2RL1         | -1.424470545 | 5.311118598 | 4.17E-13 | 1.02E-12 | 18.7060272 |
| ESCO1         | -1.127397175 | 4.992780185 | 4.29E-13 | 1.05E-12 | 18.6773451 |
| HHEX          | -1.395821717 | 6.514209219 | 4.35E-13 | 1.07E-12 | 18.6650025 |
| CLINT1        | -1.124626996 | 6.026303268 | 4.35E-13 | 1.07E-12 | 18.6646411 |
| KIAA1468      | -1.136075878 | 5.419334855 | 4.41E-13 | 1.08E-12 | 18.6513693 |
| ANP32E        | -1.513915655 | 4.788650607 | 4.64E-13 | 1.14E-12 | 18.5997406 |
| BACH2         | -1.064367201 | 5.78074336  | 4.97E-13 | 1.21E-12 | 18.5320501 |
| DNAJB14       | -2.037458943 | 5.652206744 | 5.08E-13 | 1.24E-12 | 18.5099242 |
| RNF125        | -1.640937708 | 6.720670245 | 5.24E-13 | 1.28E-12 | 18.4789213 |
| IER5          | -1.323398448 | 6.93998367  | 5.30E-13 | 1.29E-12 | 18.4672802 |
| KDM6B         | -1.010925049 | 7.650080222 | 5.90E-13 | 1.43E-12 | 18.3613389 |
| RNF138        | -1.815434386 | 4.297712594 | 5.96E-13 | 1.45E-12 | 18.3519711 |
| USP9Y         | -1.424795906 | 3.224180602 | 6.02E-13 | 1.46E-12 | 18.3418921 |
| SH3BGRL       | -1.155138613 | 8.627769126 | 6.02E-13 | 1.46E-12 | 18.3406912 |
| TRAPPC6B      | -1.316384426 | 4.796019422 | 6.17E-13 | 1.50E-12 | 18.3169022 |
| MAN1A1        | -1.601169171 | 4.748719045 | 6.27E-13 | 1.52E-12 | 18.3006567 |
| PIGB          | -1.176580735 | 6.191940792 | 6.44E-13 | 1.56E-12 | 18.2746099 |
| SGK223        | -1.158203866 | 7.772997436 | 6.44E-13 | 1.56E-12 | 18.2744273 |
| ZNF266        | -1.123212847 | 7.57262305  | 6.72E-13 | 1.63E-12 | 18.2314834 |
| ZNF514        | -1.518768831 | 5.563105512 | 6.73E-13 | 1.63E-12 | 18.2299801 |
| HDHD2         | -1.580336288 | 5.864618054 | 7.06E-13 | 1.71E-12 | 18.1834446 |
| HPS5          | -1.046209099 | 5.110044268 | 7.62E-13 | 1.84E-12 | 18.1074442 |
| ZNF600        | -1.963940164 | 4.82449212  | 7.62E-13 | 1.84E-12 | 18.1072886 |
| CYP1B1        | -1.106434278 | 5.458336134 | 7.75E-13 | 1.87E-12 | 18.0904147 |
| PARP12        | -1.133235804 | 7.728401242 | 7.82E-13 | 1.89E-12 | 18.0808505 |
| HNRNPU-AS1    | -2.13932699  | 5.59231217  | 8.13E-13 | 1.96E-12 | 18.0422599 |
| RAN           | -1.362648965 | 5.730082997 | 8.23E-13 | 1.98E-12 | 18.0298526 |
| FAM126B       | -1.342116598 | 5.425580443 | 8.54E-13 | 2.05E-12 | 17.9938423 |
| RP11-271C24.3 | -1.216422423 | 6.720499012 | 8.73E-13 | 2.10E-12 | 17.971903  |
| WSB2          | -1.338163684 | 7.380199839 | 9.46E-13 | 2.27E-12 | 17.8914834 |
| DMXL2         | -1.265188464 | 6.398773782 | 9.60E-13 | 2.30E-12 | 17.8777356 |
| LOC158402     | -1.316044921 | 4.72795925  | 9.62E-13 | 2.30E-12 | 17.8755617 |
| TMEM128       | -1.345761297 | 4.292258739 | 9.74E-13 | 2.33E-12 | 17.8626618 |
| RPS6KA3       | -1.457314645 | 6.921373502 | 9.89E-13 | 2.37E-12 | 17.8475819 |
| RAD21         | -1.419458423 | 7.487239475 | 1.04E-12 | 2.48E-12 | 17.7993069 |
| CAB39         | -1.451880076 | 6.398522818 | 1.07E-12 | 2.56E-12 | 17.7686282 |
| CLK1          | -2.03573828  | 4.419049728 | 1.09E-12 | 2.61E-12 | 17.7490733 |
| TRBC1         | -1.037421431 | 10.09427983 | 1.14E-12 | 2.71E-12 | 17.7106232 |
| PDP1          | -1.397475548 | 5.147597204 | 1.15E-12 | 2.75E-12 | 17.6939097 |
| LOC340085     | -1.038478523 | 6.176635612 | 1.19E-12 | 2.84E-12 | 17.6623596 |
| EVL           | -1.067961511 | 8.384953626 | 1.24E-12 | 2.95E-12 | 17.6248026 |
| CCT6A         | -1.049808451 | 5.509190932 | 1.24E-12 | 2.96E-12 | 17.6201984 |
| NRAS          | -1.235295752 | 4.834733683 | 1.24E-12 | 2.96E-12 | 17.6189982 |
| CPNE3         | -1.339495982 | 6.951172411 | 1.29E-12 | 3.08E-12 | 17.5801629 |
| SLC25A46      | -1.659189382 | 4.818963052 | 1.32E-12 | 3.13E-12 | 17.5643196 |
| SCOC          | -1.096700903 | 3.135052582 | 1.33E-12 | 3.16E-12 | 17.5545262 |
| TMEM243       | -1.444003831 | 5.915003807 | 1.42E-12 | 3.37E-12 | 17.4868287 |
| CREBRF        | -1.058338787 | 7.555338884 | 1.44E-12 | 3.42E-12 | 17.4709992 |
| NABP1         | -1.500259785 | 5.128921375 | 1.47E-12 | 3.49E-12 | 17.452417  |
| MTIF2         | -1.012838095 | 5.010471373 | 1.58E-12 | 3.73E-12 | 17.3837242 |

|            |              |             |          |          |            |
|------------|--------------|-------------|----------|----------|------------|
| CEBPB      | -1.092424872 | 10.96909854 | 1.63E-12 | 3.86E-12 | 17.3497228 |
| MMADHC     | -1.320285808 | 7.491017628 | 1.64E-12 | 3.87E-12 | 17.3457109 |
| ADD3       | -1.316848755 | 8.935422956 | 1.69E-12 | 3.98E-12 | 17.3165591 |
| PPP1R15B   | -1.759960665 | 6.467093167 | 1.77E-12 | 4.17E-12 | 17.2678192 |
| NKG7       | -1.432984036 | 9.418611494 | 1.80E-12 | 4.23E-12 | 17.2539275 |
| GOLGA7     | -1.089996606 | 7.606633054 | 1.87E-12 | 4.40E-12 | 17.2143051 |
| RAP2C      | -1.732633115 | 5.473146397 | 1.91E-12 | 4.50E-12 | 17.1917503 |
| PCMTD2     | -1.070191312 | 6.152596552 | 1.94E-12 | 4.56E-12 | 17.1767344 |
| HMGB1      | -1.180522151 | 7.665122444 | 1.96E-12 | 4.59E-12 | 17.1696744 |
| MRPL1      | -1.173679179 | 4.261076097 | 2.04E-12 | 4.77E-12 | 17.1297913 |
| MBNL1      | -1.101637885 | 6.358517333 | 2.18E-12 | 5.09E-12 | 17.0634149 |
| KB-431C1.4 | -1.882385128 | 5.249313173 | 2.25E-12 | 5.25E-12 | 17.0314719 |
| BC043356   | -1.178399571 | 5.26492362  | 2.25E-12 | 5.27E-12 | 17.0291244 |
| PICALM     | -1.270129398 | 6.725453512 | 2.32E-12 | 5.41E-12 | 17.0013131 |
| LAMP2      | -1.386532676 | 7.619797615 | 2.39E-12 | 5.56E-12 | 16.9726407 |
| MDH1       | -1.12834163  | 7.521249849 | 2.41E-12 | 5.63E-12 | 16.9612265 |
| TDG        | -1.501468148 | 5.463484694 | 2.46E-12 | 5.74E-12 | 16.9410239 |
| STX11      | -1.268995615 | 5.982464001 | 2.48E-12 | 5.78E-12 | 16.9329796 |
| DHX15      | -1.514013484 | 7.416614726 | 2.67E-12 | 6.21E-12 | 16.8598809 |
| LYRM1      | -1.028128311 | 7.126098816 | 2.78E-12 | 6.46E-12 | 16.8200675 |
| FOXO6      | 1.001540617  | 4.40019831  | 2.79E-12 | 6.47E-12 | 16.8179759 |
| LBR        | -2.081133957 | 7.465080088 | 2.88E-12 | 6.68E-12 | 16.785265  |
| SLC35A1    | -1.803107565 | 5.747705402 | 2.98E-12 | 6.89E-12 | 16.7529836 |
| RPS11      | 1.51459266   | 7.568108658 | 3.03E-12 | 7.02E-12 | 16.7350553 |
| KLRF1      | -1.705832574 | 6.378131404 | 3.11E-12 | 7.19E-12 | 16.7095171 |
| UBA3       | -2.013237017 | 6.565111703 | 3.29E-12 | 7.60E-12 | 16.6534442 |
| AX747730   | -1.470655935 | 4.445925169 | 3.41E-12 | 7.87E-12 | 16.6181476 |
| SCYL2      | -1.221772674 | 5.930966194 | 3.41E-12 | 7.87E-12 | 16.6181462 |
| BNIP2      | -1.629817793 | 5.426845852 | 3.42E-12 | 7.90E-12 | 16.6134486 |
| FBXL5      | -1.015471744 | 8.271927992 | 3.76E-12 | 8.65E-12 | 16.5205239 |
| UBR7       | -1.12835004  | 5.580733252 | 3.79E-12 | 8.71E-12 | 16.5126476 |
| ND2        | -1.01253687  | 11.30857506 | 3.94E-12 | 9.05E-12 | 16.4743631 |
| PAX8-AS1   | -1.008991873 | 4.586755254 | 4.18E-12 | 9.58E-12 | 16.4156623 |
| IMPA1      | -1.706134329 | 5.758764529 | 4.25E-12 | 9.74E-12 | 16.3987843 |
| RNF139     | -1.542721628 | 5.921292804 | 4.46E-12 | 1.02E-11 | 16.3502967 |
| PTTG1IP    | -1.016889112 | 8.909527956 | 4.97E-12 | 1.13E-11 | 16.2440114 |
| LUC7L3     | -1.003412914 | 6.589351933 | 5.17E-12 | 1.18E-11 | 16.2045567 |
| GLO1       | -1.032875074 | 7.050447248 | 5.36E-12 | 1.22E-11 | 16.1685284 |
| ARMC1      | -1.45227649  | 6.383606148 | 5.64E-12 | 1.28E-11 | 16.1187324 |
| LILRA5     | -1.020165586 | 5.603918171 | 5.64E-12 | 1.28E-11 | 16.1183061 |
| RASA2      | -1.377597753 | 7.045601672 | 5.99E-12 | 1.36E-11 | 16.0577805 |
| CD69       | -1.546789727 | 3.312455587 | 6.04E-12 | 1.37E-11 | 16.0502893 |
| CD160      | -1.130145474 | 5.839375185 | 6.07E-12 | 1.38E-11 | 16.0449501 |
| SLTM       | -1.569990877 | 6.11418548  | 6.41E-12 | 1.45E-11 | 15.9917253 |
| KIAA0226L  | -1.23464859  | 6.378279886 | 6.42E-12 | 1.45E-11 | 15.98954   |
| RBMXL1     | -1.175843154 | 6.603820415 | 6.68E-12 | 1.51E-11 | 15.9505513 |
| EIF3J      | -1.106303302 | 5.095235658 | 6.68E-12 | 1.51E-11 | 15.9497277 |
| LRRN3      | -1.662512523 | 5.330965545 | 6.71E-12 | 1.52E-11 | 15.9459478 |
| CRIM1      | -1.033830731 | 6.198873865 | 6.81E-12 | 1.54E-11 | 15.93034   |
| ZNF12      | -1.535711062 | 5.105144894 | 7.13E-12 | 1.61E-11 | 15.8849579 |
| CMC1       | -1.139535569 | 4.018092049 | 7.56E-12 | 1.70E-11 | 15.8274224 |
| PPIL3      | -1.371325736 | 5.743054296 | 7.56E-12 | 1.71E-11 | 15.8265483 |
| BTAf1      | -1.557367631 | 5.694896492 | 8.13E-12 | 1.83E-11 | 15.7553086 |
| CYBRD1     | -1.002831755 | 5.514281955 | 8.19E-12 | 1.84E-11 | 15.7481791 |
| NOC3L      | -1.440446843 | 4.854369445 | 8.51E-12 | 1.91E-11 | 15.7101159 |
| EOMES      | -1.361772041 | 6.694537165 | 8.76E-12 | 1.97E-11 | 15.6812388 |
| DOCK11     | -1.296116453 | 6.828651485 | 9.28E-12 | 2.08E-11 | 15.6237438 |
| SLC16A6    | -1.038716305 | 5.627867662 | 9.70E-12 | 2.17E-11 | 15.5801912 |

|               |              |             |          |          |            |
|---------------|--------------|-------------|----------|----------|------------|
| GZMB          | -1.128199907 | 8.571820711 | 1.08E-11 | 2.41E-11 | 15.4756562 |
| MRPL15        | -1.002048273 | 5.448564018 | 1.14E-11 | 2.55E-11 | 15.4158337 |
| IVNS1ABP      | -1.020731638 | 5.624562258 | 1.15E-11 | 2.55E-11 | 15.4150475 |
| GYG1          | -1.034795993 | 7.49699768  | 1.15E-11 | 2.56E-11 | 15.4140737 |
| KTN1          | -1.040759484 | 6.165830604 | 1.16E-11 | 2.58E-11 | 15.4031901 |
| TMEM181       | -1.415414246 | 6.707914221 | 1.16E-11 | 2.59E-11 | 15.4017894 |
| 1-Mar         | -1.05865617  | 5.202821968 | 1.17E-11 | 2.62E-11 | 15.3901177 |
| DUSP6         | -1.456288773 | 8.537319769 | 1.23E-11 | 2.73E-11 | 15.346304  |
| DCK           | -1.978643557 | 5.235551572 | 1.24E-11 | 2.77E-11 | 15.3336575 |
| CLPX          | -1.072216167 | 5.311269191 | 1.29E-11 | 2.86E-11 | 15.2985829 |
| STT3B         | -1.847581483 | 6.58150442  | 1.29E-11 | 2.87E-11 | 15.2949666 |
| DNAJC3        | -1.045359264 | 6.398044898 | 1.35E-11 | 2.99E-11 | 15.2549632 |
| STXBP5        | -1.1294402   | 4.607894416 | 1.40E-11 | 3.10E-11 | 15.2165442 |
| TXNDC9        | -1.050645653 | 4.283032031 | 1.42E-11 | 3.15E-11 | 15.2013975 |
| SF3B1         | -1.023724248 | 7.920900724 | 1.50E-11 | 3.32E-11 | 15.1476382 |
| RP11-589P10.5 | -1.007308324 | 7.265680857 | 1.53E-11 | 3.40E-11 | 15.124409  |
| C21orf91      | -1.211294847 | 5.656728224 | 1.66E-11 | 3.67E-11 | 15.0450713 |
| EFR3A         | -1.617311653 | 5.744473016 | 1.77E-11 | 3.90E-11 | 14.9840896 |
| PPP1R12A      | -1.511348919 | 6.189997899 | 1.80E-11 | 3.97E-11 | 14.9652314 |
| SARAF         | -1.683054117 | 9.358196828 | 2.12E-11 | 4.65E-11 | 14.8047815 |
| ARHGEF3       | -1.541204735 | 6.190702034 | 2.20E-11 | 4.82E-11 | 14.7686354 |
| GVINP1        | -1.22698593  | 5.979758788 | 2.25E-11 | 4.94E-11 | 14.7438496 |
| GNLY          | -1.288684576 | 9.727261186 | 2.29E-11 | 5.02E-11 | 14.7270932 |
| CYP4F3        | -1.459440754 | 8.197318057 | 2.36E-11 | 5.17E-11 | 14.6962623 |
| AGL           | -1.937941268 | 4.059904483 | 2.54E-11 | 5.55E-11 | 14.6256109 |
| CHD1          | -1.059687387 | 6.922955885 | 2.61E-11 | 5.69E-11 | 14.5989297 |
| CDKN2AIP      | -1.179717252 | 5.328440658 | 3.02E-11 | 6.57E-11 | 14.4530709 |
| NOD2          | -1.213708391 | 6.79713363  | 3.05E-11 | 6.64E-11 | 14.4417751 |
| ACTR3         | -1.002070318 | 8.148940164 | 3.06E-11 | 6.66E-11 | 14.4396434 |
| MAP1LC3B      | -1.010375962 | 8.434039506 | 3.37E-11 | 7.31E-11 | 14.343818  |
| C2CD5         | -1.641318529 | 6.091960146 | 3.42E-11 | 7.41E-11 | 14.3304041 |
| C6orf211      | -1.916767469 | 4.33636534  | 3.47E-11 | 7.51E-11 | 14.3157753 |
| VNN1          | -1.240788904 | 4.528834736 | 3.58E-11 | 7.75E-11 | 14.2846516 |
| CMPK1         | -1.204427859 | 4.970065962 | 3.90E-11 | 8.43E-11 | 14.1986476 |
| SERINC1       | -1.77049795  | 7.554628599 | 3.93E-11 | 8.49E-11 | 14.1917118 |
| HIST1H2BC     | -1.155194129 | 5.551982168 | 3.93E-11 | 8.49E-11 | 14.1916428 |
| CHSY1         | -1.350541023 | 6.398266781 | 3.98E-11 | 8.59E-11 | 14.1796854 |
| ZNF559        | -1.324935297 | 5.626534017 | 4.15E-11 | 8.95E-11 | 14.13676   |
| DLD           | -1.113679951 | 5.866119909 | 4.65E-11 | 9.99E-11 | 14.0253152 |
| LAP3          | -1.362910374 | 7.128978907 | 4.69E-11 | 1.01E-10 | 14.015745  |
| RB1CC1        | -1.233205964 | 5.439871978 | 4.78E-11 | 1.03E-10 | 13.9983171 |
| ZBTB16        | -1.023347029 | 5.816846014 | 4.83E-11 | 1.04E-10 | 13.9873292 |
| TVP23B        | -1.152018194 | 3.040834563 | 4.85E-11 | 1.04E-10 | 13.9825107 |
| FAM35A        | -1.58374854  | 5.699966555 | 5.06E-11 | 1.08E-10 | 13.9420756 |
| GCA           | -1.761639433 | 8.719966272 | 5.13E-11 | 1.10E-10 | 13.9281591 |
| C12orf29      | -1.080779563 | 3.950620886 | 5.49E-11 | 1.17E-10 | 13.8605052 |
| NRBF2         | -1.577308176 | 6.870182602 | 5.54E-11 | 1.18E-10 | 13.8513492 |
| MARCKS        | -1.064021998 | 7.03701376  | 5.72E-11 | 1.22E-10 | 13.8204687 |
| TMEM123       | -1.907096719 | 7.8862232   | 6.11E-11 | 1.30E-10 | 13.7546267 |
| CGGBP1        | -1.128580666 | 6.67069063  | 6.40E-11 | 1.36E-10 | 13.7086239 |
| LYSMD2        | -1.252946883 | 8.443411942 | 6.42E-11 | 1.37E-10 | 13.7059957 |
| SHOC2         | -1.495192975 | 7.291881495 | 6.44E-11 | 1.37E-10 | 13.7028368 |
| DSERG1        | -1.057001725 | 7.266173217 | 6.46E-11 | 1.38E-10 | 13.69922   |
| UGCG          | -1.040878838 | 6.331256466 | 7.37E-11 | 1.56E-10 | 13.5683171 |
| ZNF267        | -1.751008369 | 4.02296632  | 7.57E-11 | 1.61E-10 | 13.5416494 |
| CPD           | -1.007049222 | 5.629070609 | 8.58E-11 | 1.81E-10 | 13.4183482 |
| EXOC1         | -1.52472399  | 6.020031709 | 8.82E-11 | 1.86E-10 | 13.3905073 |
| SLC9A6        | -1.344691386 | 5.787257209 | 8.87E-11 | 1.87E-10 | 13.3854305 |



|           |              |             |          |          |            |
|-----------|--------------|-------------|----------|----------|------------|
| SGTB      | -1.023688333 | 4.07097449  | 9.18E-11 | 1.94E-10 | 13.3508052 |
| REEP5     | -1.126259549 | 7.211580326 | 9.47E-11 | 1.99E-10 | 13.3207673 |
| PSMD14    | -1.148842751 | 5.97750821  | 9.71E-11 | 2.04E-10 | 13.2956041 |
| GMFB      | -1.313283221 | 4.936408174 | 9.90E-11 | 2.08E-10 | 13.2763272 |
| EXOSC8    | -1.014621426 | 5.609685352 | 1.02E-10 | 2.15E-10 | 13.2421393 |
| NOP58     | -1.33425451  | 6.496143029 | 1.07E-10 | 2.25E-10 | 13.1966656 |
| SRP9      | -2.359679755 | 7.149366141 | 1.13E-10 | 2.37E-10 | 13.1448211 |
| LOC286052 | -1.362713171 | 5.46465568  | 1.15E-10 | 2.42E-10 | 13.123732  |
| PNPLA8    | -1.327302584 | 5.94780682  | 1.16E-10 | 2.43E-10 | 13.1169728 |
| KIAA1033  | -1.396974361 | 6.479022499 | 1.20E-10 | 2.52E-10 | 13.0835925 |
| ATP2B1    | -1.339966004 | 6.177557576 | 1.34E-10 | 2.79E-10 | 12.9780723 |
| CNEP1R1   | -1.326267779 | 6.483980304 | 1.41E-10 | 2.93E-10 | 12.9295772 |
| TCF15     | 1.126112528  | 5.639776207 | 1.48E-10 | 3.07E-10 | 12.8814077 |
| RNF111    | -1.469680767 | 6.397012321 | 1.59E-10 | 3.30E-10 | 12.8087912 |
| GIMAP7    | -1.11169943  | 7.623984751 | 1.75E-10 | 3.62E-10 | 12.7135695 |
| KIAA1324  | -1.106993379 | 5.797703836 | 1.81E-10 | 3.75E-10 | 12.6764613 |
| SERP1     | -1.355776299 | 6.589189527 | 1.82E-10 | 3.77E-10 | 12.6720239 |
| NLRC3     | -1.120022348 | 7.599497084 | 1.82E-10 | 3.77E-10 | 12.67119   |
| CPPED1    | -1.006099777 | 8.858328363 | 1.89E-10 | 3.90E-10 | 12.6379497 |
| CST7      | -1.018030277 | 9.157513484 | 1.89E-10 | 3.90E-10 | 12.6367306 |
| MAP3K7CL  | -1.371182759 | 5.746568597 | 1.90E-10 | 3.93E-10 | 12.6287157 |
| KLHL2     | -2.023850246 | 5.165893765 | 2.04E-10 | 4.21E-10 | 12.5586584 |
| HSD17B11  | -1.269702455 | 8.855788601 | 2.18E-10 | 4.48E-10 | 12.4968958 |
| SH3BGR2   | -1.067530135 | 6.324761454 | 2.61E-10 | 5.35E-10 | 12.3165012 |
| RTP4      | -1.063887729 | 6.003060633 | 2.78E-10 | 5.69E-10 | 12.2542917 |
| TMCC3     | -1.13032381  | 6.397537958 | 2.85E-10 | 5.83E-10 | 12.229861  |
| DDX21     | -1.016966578 | 7.162554424 | 2.88E-10 | 5.89E-10 | 12.2189598 |
| MYC       | -1.150820594 | 7.009159729 | 3.06E-10 | 6.25E-10 | 12.1576399 |
| HSPE1     | -1.033449849 | 5.132463697 | 3.14E-10 | 6.39E-10 | 12.1346525 |
| CLIC3     | -1.314065411 | 6.127087073 | 3.16E-10 | 6.43E-10 | 12.1288686 |
| LEPROTL1  | -1.082966322 | 7.252502479 | 3.22E-10 | 6.55E-10 | 12.1099601 |
| CD46      | -1.624582226 | 7.062454733 | 3.34E-10 | 6.80E-10 | 12.0715281 |
| ITM2A     | -1.073532181 | 7.628061231 | 3.36E-10 | 6.82E-10 | 12.0675526 |
| CCT2      | -1.083461304 | 6.228097355 | 3.41E-10 | 6.92E-10 | 12.0527531 |
| TGFBR3    | -1.12439746  | 6.579618867 | 3.49E-10 | 7.09E-10 | 12.0285679 |
| HIAT1     | -1.642986323 | 6.568649572 | 3.77E-10 | 7.63E-10 | 11.9536274 |
| IGJ       | -1.695327779 | 5.47069069  | 3.81E-10 | 7.71E-10 | 11.9424186 |
| TMEM170B  | -1.620129856 | 5.322295259 | 3.81E-10 | 7.72E-10 | 11.9416886 |
| NOL11     | -1.005683129 | 6.119929131 | 3.85E-10 | 7.79E-10 | 11.931433  |
| FMR1      | -1.782471033 | 5.74990009  | 4.13E-10 | 8.34E-10 | 11.8626421 |
| GCH1      | -1.612394206 | 7.03993444  | 4.31E-10 | 8.69E-10 | 11.8209736 |
| FBXO6     | -1.014745075 | 5.833776778 | 4.47E-10 | 9.01E-10 | 11.7841662 |
| LIPA      | -1.126327398 | 8.331107747 | 4.68E-10 | 9.41E-10 | 11.7387595 |
| IL13RA1   | -1.054122753 | 7.013589495 | 5.72E-10 | 1.14E-09 | 11.5407926 |
| PTPRC     | -1.256546424 | 8.163306779 | 5.83E-10 | 1.17E-09 | 11.5216472 |
| TMEM71    | -1.476555802 | 7.66953165  | 6.14E-10 | 1.23E-09 | 11.4709996 |
| ZNF700    | -1.225071485 | 4.928956363 | 6.78E-10 | 1.35E-09 | 11.3717416 |
| ZNF281    | -1.004060526 | 6.449915819 | 7.11E-10 | 1.41E-09 | 11.3257635 |
| CSF2RB    | -1.427730879 | 9.716531851 | 7.15E-10 | 1.42E-09 | 11.3199831 |
| SELT      | -1.154597691 | 5.884472726 | 7.53E-10 | 1.49E-09 | 11.2682497 |
| GNAI3     | -1.122402481 | 6.304610755 | 8.57E-10 | 1.70E-09 | 11.1405265 |
| KCTD9     | -1.059061743 | 4.614415687 | 9.13E-10 | 1.80E-09 | 11.0781247 |
| PTGES3    | -1.342731647 | 8.781623702 | 9.85E-10 | 1.94E-09 | 11.003493  |
| PGRMC1    | -1.111947921 | 6.873036002 | 1.04E-09 | 2.04E-09 | 10.9509021 |
| CASP3     | -1.165474565 | 4.912991116 | 1.09E-09 | 2.15E-09 | 10.901465  |
| TAB2      | -1.321419839 | 6.347545779 | 1.18E-09 | 2.32E-09 | 10.8240752 |
| EXOC8     | -1.664868336 | 4.824996156 | 1.20E-09 | 2.36E-09 | 10.8068065 |
| AKR1C3    | -1.148433562 | 4.408240665 | 1.30E-09 | 2.54E-09 | 10.730073  |

|               |              |             |          |          |            |
|---------------|--------------|-------------|----------|----------|------------|
| BAZ1A         | -1.131671938 | 7.415849691 | 1.32E-09 | 2.59E-09 | 10.7116788 |
| PPP3CA        | -1.118406655 | 7.506819886 | 1.44E-09 | 2.81E-09 | 10.6278096 |
| NELL2         | -1.219181897 | 7.26328436  | 1.46E-09 | 2.85E-09 | 10.6129831 |
| RASSF3        | -1.101296605 | 7.338431035 | 1.89E-09 | 3.67E-09 | 10.3578352 |
| FAM65B        | -1.040805004 | 9.352689567 | 2.05E-09 | 3.96E-09 | 10.2814756 |
| GALNT7        | -1.321949618 | 5.827830948 | 2.29E-09 | 4.42E-09 | 10.1706586 |
| HSPBAP1       | -1.020561218 | 6.918792418 | 2.30E-09 | 4.44E-09 | 10.1649979 |
| ANP32A-IT1    | -1.479478662 | 5.978369501 | 2.43E-09 | 4.68E-09 | 10.1131758 |
| GIMAP2        | -1.425088104 | 7.470190346 | 2.56E-09 | 4.92E-09 | 10.061535  |
| SAMD9         | -1.017192118 | 5.164870478 | 2.57E-09 | 4.95E-09 | 10.0546112 |
| ZBTB34        | -1.193213485 | 6.506544916 | 2.60E-09 | 5.00E-09 | 10.0460438 |
| OSBPL11       | -1.107418816 | 6.836176728 | 2.77E-09 | 5.32E-09 | 9.9813468  |
| ZRANB2        | -1.212974849 | 6.491624086 | 2.85E-09 | 5.46E-09 | 9.95565781 |
| PARP8         | -1.350093109 | 6.6814381   | 3.11E-09 | 5.95E-09 | 9.86733258 |
| HSP90AA1      | -1.318951883 | 7.942920129 | 3.36E-09 | 6.42E-09 | 9.79045334 |
| BAZ2B         | -1.453400164 | 6.522937481 | 3.52E-09 | 6.71E-09 | 9.7468071  |
| TAF1D         | -1.194490958 | 6.058335451 | 3.56E-09 | 6.80E-09 | 9.7331353  |
| AGAP4         | -1.252135966 | 6.396220762 | 3.77E-09 | 7.17E-09 | 9.67803179 |
| FAS           | -1.33060862  | 5.20636893  | 3.99E-09 | 7.58E-09 | 9.62183047 |
| TCL1A         | -1.075800575 | 6.426902217 | 4.85E-09 | 9.17E-09 | 9.42957764 |
| GBP3          | -1.869222854 | 5.090183276 | 4.90E-09 | 9.26E-09 | 9.41932412 |
| SUCO          | -1.333735152 | 5.038666024 | 5.03E-09 | 9.49E-09 | 9.39402057 |
| PPA1          | -1.137185334 | 7.401168156 | 5.60E-09 | 1.05E-08 | 9.28791067 |
| GBP5          | -1.150412705 | 6.295273202 | 5.69E-09 | 1.07E-08 | 9.27202559 |
| LAMTOR3       | -1.2013605   | 4.848156391 | 5.71E-09 | 1.08E-08 | 9.26798164 |
| ACSL4         | -1.0431212   | 5.627221966 | 6.91E-09 | 1.29E-08 | 9.08095478 |
| KCTD12        | -1.249801634 | 8.191130904 | 7.66E-09 | 1.43E-08 | 8.97910366 |
| MFS1          | -1.272996027 | 7.874544986 | 7.96E-09 | 1.48E-08 | 8.94093171 |
| SMCHD1        | -1.159016995 | 7.072621811 | 8.85E-09 | 1.65E-08 | 8.83626684 |
| DYNLT3        | -1.11302462  | 5.695669013 | 9.48E-09 | 1.76E-08 | 8.76914418 |
| RP11-549J18.1 | -1.655242601 | 3.044979223 | 9.75E-09 | 1.81E-08 | 8.74138431 |
| PPT1          | -1.018718339 | 10.02577569 | 9.94E-09 | 1.84E-08 | 8.72201891 |
| GSKIP         | -1.661262052 | 5.132072377 | 1.07E-08 | 1.97E-08 | 8.65415031 |
| CDC42-IT1     | -1.154304963 | 7.535716754 | 1.14E-08 | 2.10E-08 | 8.59012016 |
| DDX60         | -1.160850056 | 4.239929416 | 1.25E-08 | 2.30E-08 | 8.49790885 |
| TDP2          | -1.69655743  | 6.781432968 | 1.28E-08 | 2.34E-08 | 8.4761913  |
| HIST1H2AC     | -1.194927095 | 9.375639236 | 1.42E-08 | 2.59E-08 | 8.37433552 |
| TRIM22        | -1.416003728 | 8.820347628 | 1.44E-08 | 2.63E-08 | 8.36034255 |
| FAM96A        | -1.079018117 | 6.937483964 | 1.49E-08 | 2.73E-08 | 8.32171279 |
| MME           | -1.08971891  | 7.80920771  | 1.60E-08 | 2.92E-08 | 8.25223845 |
| POMZP3        | -1.097698313 | 5.086484955 | 1.78E-08 | 3.24E-08 | 8.14608738 |
| SPOPL         | -1.233149636 | 6.181738127 | 1.82E-08 | 3.30E-08 | 8.12746905 |
| PHOSPHO1      | -1.023963676 | 7.214504756 | 2.17E-08 | 3.94E-08 | 7.95146471 |
| ANKRD49       | -1.106131494 | 6.379908034 | 2.35E-08 | 4.24E-08 | 7.87578992 |
| RRN3P2        | -1.004429445 | 5.90403788  | 2.35E-08 | 4.24E-08 | 7.87519561 |
| QPCT          | -1.097762183 | 8.454175985 | 2.84E-08 | 5.10E-08 | 7.6903606  |
| FAM174A       | -1.190784426 | 6.072481089 | 2.86E-08 | 5.13E-08 | 7.68334044 |
| SLC38A2       | -1.651795757 | 7.306136613 | 3.03E-08 | 5.45E-08 | 7.62374446 |
| CTB-181H17.1  | -1.10885136  | 5.276657044 | 3.39E-08 | 6.07E-08 | 7.51430688 |
| DENND6A       | -1.188597146 | 6.028578652 | 3.61E-08 | 6.44E-08 | 7.4539611  |
| ZNHIT3        | -1.106068974 | 4.884085371 | 3.72E-08 | 6.64E-08 | 7.42371055 |
| CCNG1         | -1.538427643 | 6.735742621 | 3.73E-08 | 6.65E-08 | 7.4216057  |
| LOC100505874  | -1.278987349 | 3.973024939 | 4.01E-08 | 7.14E-08 | 7.35078999 |
| GPR183        | -1.036161969 | 6.771539192 | 4.32E-08 | 7.69E-08 | 7.27606525 |
| TLR8          | -1.098492227 | 7.47806195  | 4.60E-08 | 8.18E-08 | 7.21404367 |
| TLR1          | -1.191461296 | 7.893875735 | 4.98E-08 | 8.84E-08 | 7.13589764 |
| RBM38         | 1.106418137  | 9.832165374 | 5.05E-08 | 8.95E-08 | 7.12290001 |
| USP1          | -1.159988963 | 6.600678079 | 5.07E-08 | 8.98E-08 | 7.11917629 |

|              |              |             |          |          |            |
|--------------|--------------|-------------|----------|----------|------------|
| GOLGA8N      | -1.242466965 | 6.907545803 | 5.56E-08 | 9.82E-08 | 7.0293638  |
| SNORD89      | -1.145490453 | 7.604525805 | 6.54E-08 | 1.15E-07 | 6.86867237 |
| NAE1         | -1.070754902 | 5.929742904 | 6.67E-08 | 1.17E-07 | 6.85053956 |
| PSMC6        | -1.496994012 | 5.459629028 | 6.91E-08 | 1.21E-07 | 6.81573668 |
| SDCBP        | -1.044566136 | 11.23681924 | 6.98E-08 | 1.23E-07 | 6.80481694 |
| PPP1CC       | -1.188152157 | 8.448718091 | 7.13E-08 | 1.25E-07 | 6.78389187 |
| CCR7         | -1.011373773 | 8.423265349 | 7.76E-08 | 1.36E-07 | 6.70133763 |
| DHX29        | -1.057352369 | 5.894689904 | 7.88E-08 | 1.38E-07 | 6.68630121 |
| VBP1         | -1.471897701 | 6.312706868 | 7.99E-08 | 1.40E-07 | 6.67282474 |
| SDPR         | -1.053116129 | 5.730412701 | 8.02E-08 | 1.40E-07 | 6.66869318 |
| YPEL5        | -1.038625081 | 8.242507976 | 8.04E-08 | 1.41E-07 | 6.66694741 |
| VAMP7        | -1.095648362 | 7.083406203 | 8.33E-08 | 1.46E-07 | 6.63160056 |
| MYL4         | 1.076200549  | 9.364609791 | 8.76E-08 | 1.53E-07 | 6.5818314  |
| MYOM2        | -1.218422546 | 5.760626931 | 9.20E-08 | 1.60E-07 | 6.53464946 |
| NPTN-IT1     | -1.174271449 | 6.173458728 | 9.44E-08 | 1.64E-07 | 6.50930368 |
| DPM1         | -1.177774704 | 6.323234435 | 9.89E-08 | 1.72E-07 | 6.46352367 |
| CTBS         | -1.035771613 | 6.747803955 | 1.06E-07 | 1.84E-07 | 6.39555765 |
| TUBB1        | -1.196891871 | 7.728955455 | 1.23E-07 | 2.13E-07 | 6.24877017 |
| ITLN1        | 1.096279857  | 5.403979104 | 1.64E-07 | 2.81E-07 | 5.96830802 |
| SIRPB2       | -1.081867287 | 7.887734443 | 1.69E-07 | 2.91E-07 | 5.9354157  |
| CSGALNACT1   | -1.385032503 | 5.394884331 | 1.76E-07 | 3.02E-07 | 5.8955258  |
| OLIG1        | -1.056288896 | 6.898510876 | 1.81E-07 | 3.10E-07 | 5.87056163 |
| SNRNP200     | -1.109260296 | 6.430192948 | 2.27E-07 | 3.86E-07 | 5.6506945  |
| CCZ1B        | -1.053089837 | 6.378258472 | 2.28E-07 | 3.88E-07 | 5.64484066 |
| WLS          | -1.051520795 | 5.989551475 | 2.73E-07 | 4.63E-07 | 5.46785892 |
| DEK          | -1.587704361 | 6.720268076 | 2.91E-07 | 4.93E-07 | 5.40465932 |
| HLA-DRB4     | -1.795255905 | 5.139862567 | 3.13E-07 | 5.29E-07 | 5.33385064 |
| SOD2         | 1.02046075   | 7.973189867 | 3.46E-07 | 5.82E-07 | 5.23752384 |
| RNF149       | -1.100301647 | 9.948199741 | 3.50E-07 | 5.89E-07 | 5.22516623 |
| ZNF23        | -1.037636612 | 3.931086023 | 3.67E-07 | 6.18E-07 | 5.1780318  |
| COMMD8       | -1.460855949 | 5.020333859 | 4.06E-07 | 6.80E-07 | 5.08091357 |
| GPR65        | -1.275430055 | 6.501257143 | 4.21E-07 | 7.05E-07 | 5.04495455 |
| RAP1B        | -1.330387274 | 9.034234211 | 4.41E-07 | 7.39E-07 | 4.99817561 |
| NFXL1        | -1.183603819 | 4.034685781 | 5.78E-07 | 9.61E-07 | 4.73381316 |
| GPR160       | -1.239473246 | 6.079211357 | 5.86E-07 | 9.73E-07 | 4.72124033 |
| ADAT1        | -1.001952694 | 6.198603596 | 6.40E-07 | 1.06E-06 | 4.63430339 |
| RPS24        | -1.145069477 | 7.079650963 | 6.62E-07 | 1.10E-06 | 4.60126821 |
| TMEM167A     | -1.073519179 | 6.322816599 | 7.02E-07 | 1.16E-06 | 4.54467282 |
| RP11-68I3.11 | -1.116380056 | 5.524133088 | 7.50E-07 | 1.24E-06 | 4.47948759 |
| RNF13        | -1.145710829 | 7.95210324  | 7.73E-07 | 1.27E-06 | 4.45088127 |
| AHSP         | 1.50707113   | 10.20486513 | 8.73E-07 | 1.43E-06 | 4.33183453 |
| P2RY14       | -1.37411889  | 5.593410215 | 1.12E-06 | 1.83E-06 | 4.08751283 |
| VPS4B        | -1.1677501   | 7.24380994  | 1.39E-06 | 2.26E-06 | 3.87704461 |
| RGS18        | -1.818720034 | 6.683566623 | 1.61E-06 | 2.60E-06 | 3.73726382 |
| FGL2         | -1.055771971 | 9.329328408 | 1.62E-06 | 2.62E-06 | 3.72681979 |
| HAT1         | -1.187488977 | 4.407886285 | 2.04E-06 | 3.28E-06 | 3.50398671 |
| ACSL1        | -1.124292307 | 9.09551315  | 2.67E-06 | 4.25E-06 | 3.2428208  |
| BC044596     | -1.230488494 | 6.603716    | 2.71E-06 | 4.32E-06 | 3.22659258 |
| GNG10        | -1.286780562 | 8.897307801 | 2.84E-06 | 4.53E-06 | 3.18054567 |
| FLJ12120     | -1.318041428 | 6.284578223 | 5.16E-06 | 8.07E-06 | 2.60112584 |
| TAF7         | -1.122041276 | 7.642654838 | 5.32E-06 | 8.31E-06 | 2.57209369 |
| FAM8A1       | -1.106952788 | 7.725285015 | 6.10E-06 | 9.48E-06 | 2.43983556 |
| GZMH         | -1.227533189 | 8.347079698 | 6.25E-06 | 9.72E-06 | 2.41554371 |
| SNX10        | -1.31845132  | 6.931322294 | 8.17E-06 | 1.26E-05 | 2.1559972  |
| LYZ          | -1.175487076 | 10.74142117 | 8.47E-06 | 1.31E-05 | 2.1206327  |
| TXLNGY       | -1.08951745  | 4.205630063 | 1.26E-05 | 1.92E-05 | 1.73802986 |
| NAMPT        | -1.016192931 | 9.327638111 | 1.45E-05 | 2.21E-05 | 1.59833397 |
| PPP1CB       | -1.132672785 | 6.592561472 | 1.69E-05 | 2.55E-05 | 1.45526907 |

|              |              |             |             |             |            |
|--------------|--------------|-------------|-------------|-------------|------------|
| LOC102724387 | 1.064825441  | 4.091686697 | 1.89E-05    | 2.85E-05    | 1.34617552 |
| IFI44        | -1.085270635 | 4.585670928 | 2.69E-05    | 4.01E-05    | 1.00403372 |
| NEK7         | -1.297920098 | 6.837496273 | 4.40E-05    | 6.48E-05    | 0.52979271 |
| PRKAR2B      | -1.10816076  | 7.374646353 | 5.79E-05    | 8.45E-05    | 0.26627083 |
| RGS2         | -1.017180028 | 10.73228077 | 6.10E-05    | 8.90E-05    | 0.21585124 |
| ABCB10       | -1.163482289 | 4.599812551 | 8.29E-05    | 0.000119779 | -0.0774897 |
| PF4V1        | -1.161472378 | 6.392290154 | 0.000111256 | 0.000159448 | -0.3595206 |
| LRRK2        | -1.066401911 | 7.464303274 | 0.000192494 | 0.000271808 | -0.8829375 |
| KRT1         | 1.243475499  | 9.436360118 | 0.000346464 | 0.000481312 | -1.4417174 |
| CMPK2        | -1.0635043   | 6.596959522 | 0.000530235 | 0.000727093 | -1.8445994 |
| KDM5D        | -1.081175605 | 5.800888392 | 0.001952627 | 0.002580662 | -3.067889  |
| APOBEC3B     | -1.037409123 | 3.784904302 | 0.025806494 | 0.031265504 | -5.4128863 |

## Degree data

| name   | Degree | Edge Count | Indegree | Neighborhood<br>Connectivity | Number of<br>Directed Edges | Topological<br>Coefficient |
|--------|--------|------------|----------|------------------------------|-----------------------------|----------------------------|
| ACVR1C | 1      | 1          | 0        | 2                            | 1                           | 0                          |
| ACVR2A | 2      | 2          | 1        | 1.5                          | 2                           | 0.5                        |
| TGFBR3 | 2      | 2          | 2        | 3                            | 2                           | 0.5                        |
| ADRB2  | 7      | 7          | 0        | 8                            | 7                           | 0.27093596                 |
| PTGER2 | 4      | 4          | 2        | 4.75                         | 4                           | 0.67857143                 |
| EGF    | 12     | 12         | 3        | 19.66666667                  | 12                          | 0.28381643                 |
| MC4R   | 4      | 4          | 1        | 4.75                         | 4                           | 0.67857143                 |
| PTGER4 | 4      | 4          | 3        | 4.75                         | 4                           | 0.67857143                 |
| VIPR1  | 4      | 4          | 4        | 4.75                         | 4                           | 0.67857143                 |
| CCL4   | 14     | 14         | 1        | 10.5                         | 14                          | 0.1779661                  |
| CXCR4  | 14     | 14         | 7        | 15.21428571                  | 14                          | 0.2237395                  |
| APC    | 9      | 9          | 0        | 6.77777778                   | 9                           | 0.28502415                 |
| PSMD7  | 8      | 8          | 5        | 12.75                        | 8                           | 0.27717391                 |
| PSME3  | 8      | 8          | 6        | 12.75                        | 8                           | 0.27717391                 |
| CACYBP | 1      | 1          | 1        | 9                            | 1                           | 0                          |
| PSMC6  | 8      | 8          | 2        | 12.75                        | 8                           | 0.27717391                 |
| PSMD14 | 8      | 8          | 4        | 12.75                        | 8                           | 0.27717391                 |
| HDAC1  | 7      | 7          | 5        | 5.14285714                   | 7                           | 0.21118012                 |
| PSMD11 | 8      | 8          | 3        | 12.75                        | 8                           | 0.27717391                 |
| CASP3  | 9      | 9          | 1        | 8.77777778                   | 9                           | 0.16326531                 |
| TCF7L2 | 4      | 4          | 4        | 6.25                         | 4                           | 0.31578947                 |
| ATF1   | 2      | 2          | 0        | 7.5                          | 2                           | 0.625                      |
| ATF2   | 9      | 9          | 1        | 9.11111111                   | 9                           | 0.19806763                 |
| CREB1  | 6      | 6          | 2        | 14.83333333                  | 6                           | 0.29333333                 |
| NR3C1  | 12     | 12         | 6        | 15.58333333                  | 12                          | 0.19479167                 |
| IRF1   | 9      | 9          | 4        | 11.33333333                  | 9                           | 0.18888889                 |
| EED    | 2      | 2          | 1        | 8                            | 2                           | 0.61538462                 |
| HMGB1  | 10     | 10         | 2        | 13                           | 10                          | 0.21666667                 |
| RELA   | 26     | 26         | 24       | 11.61538462                  | 26                          | 0.13994439                 |
| FOS    | 8      | 8          | 3        | 12                           | 8                           | 0.21428571                 |
| BCL10  | 5      | 5          | 0        | 15.8                         | 5                           | 0.36744186                 |
| PRKCQ  | 15     | 15         | 14       | 14.53333333                  | 15                          | 0.2127451                  |
| MALT1  | 5      | 5          | 3        | 15.8                         | 5                           | 0.36744186                 |
| CHUK   | 16     | 16         | 1        | 8.875                        | 16                          | 0.17401961                 |
| IKBKB  | 17     | 17         | 7        | 8.58823529                   | 17                          | 0.17058824                 |
| BLNK   | 11     | 11         | 0        | 18.09090909                  | 11                          | 0.36181818                 |
| PIK3R1 | 30     | 30         | 25       | 13                           | 30                          | 0.15116279                 |
| VAV3   | 11     | 11         | 11       | 18.09090909                  | 11                          | 0.31578947                 |
| PIK3CA | 36     | 36         | 27       | 12.83333333                  | 36                          | 0.14750958                 |
| CBLB   | 11     | 11         | 1        | 17.09090909                  | 11                          | 0.35416667                 |
| FGR    | 9      | 9          | 4        | 17.33333333                  | 9                           | 0.36111111                 |
| FYN    | 28     | 28         | 10       | 14.57142857                  | 28                          | 0.18214286                 |
| LCK    | 31     | 31         | 16       | 14.35483871                  | 31                          | 0.16312317                 |
| LAT    | 13     | 13         | 8        | 16.30769231                  | 13                          | 0.28609987                 |
| CD19   | 6      | 6          | 2        | 16.33333333                  | 6                           | 0.38492063                 |
| ZAP70  | 15     | 15         | 15       | 14.13333333                  | 15                          | 0.27712418                 |
| NCK1   | 9      | 9          | 6        | 16.88888889                  | 9                           | 0.3015873                  |
| BRAF   | 6      | 6          | 0        | 13.33333333                  | 6                           | 0.33760684                 |
| CSK    | 18     | 18         | 5        | 15.94444444                  | 18                          | 0.26574074                 |
| RAF1   | 11     | 11         | 9        | 18.63636364                  | 11                          | 0.24521531                 |
| NGF    | 8      | 8          | 4        | 19.875                       | 8                           | 0.29477612                 |
| PAK2   | 17     | 17         | 10       | 11.82352941                  | 17                          | 0.19607843                 |
| NRAS   | 16     | 16         | 9        | 18                           | 16                          | 0.2278481                  |
| MAP2K1 | 10     | 10         | 5        | 17.3                         | 10                          | 0.31272727                 |

|          |    |    |    |             |    |            |
|----------|----|----|----|-------------|----|------------|
| GZMB     | 4  | 4  | 3  | 4.75        | 4  | 0.28333333 |
| TNFRSF10 | 5  | 5  | 4  | 9.6         | 5  | 0.368      |
| SLK      | 1  | 1  | 1  | 9           | 1  | 0          |
| VIM      | 1  | 1  | 1  | 9           | 1  | 0          |
| RHOA     | 19 | 19 | 14 | 15.10526316 | 19 | 0.19365722 |
| UBR1     | 1  | 1  | 1  | 11          | 1  | 0          |
| PIK3CG   | 9  | 9  | 6  | 19.44444444 | 9  | 0.32956685 |
| CCR7     | 8  | 8  | 1  | 11.25       | 8  | 0.41666667 |
| CXCL5    | 8  | 8  | 4  | 11.25       | 8  | 0.41666667 |
| S1PR1    | 14 | 14 | 14 | 16.92857143 | 14 | 0.27751756 |
| CXCR2    | 8  | 8  | 5  | 11.25       | 8  | 0.41666667 |
| CX3CR1   | 8  | 8  | 2  | 11.25       | 8  | 0.41666667 |
| CXCL1    | 9  | 9  | 3  | 10          | 9  | 0.38034188 |
| TNF      | 18 | 18 | 17 | 9.61111111  | 18 | 0.14478114 |
| FPR2     | 15 | 15 | 9  | 12.6        | 15 | 0.23333333 |
| CD81     | 1  | 1  | 1  | 6           | 1  | 0          |
| CD1D     | 1  | 1  | 0  | 14          | 1  | 0          |
| CD3E     | 14 | 14 | 3  | 15.64285714 | 14 | 0.27318296 |
| CD247    | 12 | 12 | 0  | 17.5        | 12 | 0.32407407 |
| CD28     | 13 | 13 | 1  | 18.07692308 | 13 | 0.296343   |
| CD8B     | 11 | 11 | 4  | 18.72727273 | 11 | 0.34680135 |
| SH3BP2   | 5  | 5  | 3  | 16.6        | 5  | 0.48823529 |
| CD8A     | 11 | 11 | 3  | 18.72727273 | 11 | 0.34680135 |
| ITGAV    | 12 | 12 | 6  | 17.91666667 | 12 | 0.26348039 |
| ITGAL    | 3  | 3  | 2  | 13.33333333 | 3  | 0.44444444 |
| HLA-DPB  | 10 | 10 | 2  | 12          | 10 | 0.25319149 |
| CDK4     | 3  | 3  | 0  | 9.66666667  | 3  | 0.44444444 |
| HSP90AA  | 15 | 15 | 3  | 14.46666667 | 15 | 0.2159204  |
| HSP90AB  | 7  | 7  | 3  | 11.42857143 | 7  | 0.2484472  |
| IFIH1    | 5  | 5  | 1  | 15.6        | 5  | 0.35348837 |
| NOD2     | 4  | 4  | 3  | 10.5        | 4  | 0.58333333 |
| FAS      | 5  | 5  | 1  | 20.8        | 5  | 0.4        |
| TLR1     | 3  | 3  | 3  | 14.33333333 | 3  | 0.65151515 |
| CYLD     | 5  | 5  | 1  | 14.2        | 5  | 0.355      |
| TLR4     | 7  | 7  | 6  | 15.57142857 | 7  | 0.31142857 |
| TNFAIP3  | 4  | 4  | 4  | 13.75       | 4  | 0.47413793 |
| CSF2RB   | 5  | 5  | 0  | 23          | 5  | 0.38965517 |
| STAT1    | 16 | 16 | 15 | 9.1875      | 16 | 0.13257576 |
| ZYX      | 6  | 6  | 6  | 18.33333333 | 6  | 0.39492754 |
| LYZ      | 1  | 1  | 1  | 9           | 1  | 0          |
| F2R      | 5  | 5  | 0  | 18.2        | 5  | 0.40444444 |
| F2RL1    | 4  | 4  | 1  | 21.5        | 4  | 0.48863636 |
| NCK2     | 5  | 5  | 4  | 17.4        | 5  | 0.39090909 |
| GNLY     | 2  | 2  | 0  | 3           | 2  | 0.75       |
| PRF1     | 2  | 2  | 2  | 3           | 2  | 0.75       |
| RXRβ     | 1  | 1  | 1  | 7           | 1  | 0          |
| TRIM22   | 2  | 2  | 2  | 9.5         | 2  | 0.59375    |
| TRIM5    | 2  | 2  | 2  | 9.5         | 2  | 0.59375    |
| LGMN     | 1  | 1  | 1  | 10          | 1  | 0          |
| HSPA4    | 2  | 2  | 2  | 11          | 2  | 0.73333333 |
| NR3C2    | 3  | 3  | 3  | 11.33333333 | 3  | 0.53968254 |
| TANK     | 3  | 3  | 1  | 10          | 3  | 0.48333333 |
| IFNGR2   | 1  | 1  | 0  | 16          | 1  | 0          |
| IL10RA   | 1  | 1  | 0  | 16          | 1  | 0          |
| IL12RB2  | 2  | 2  | 0  | 23.5        | 2  | 0.55952381 |
| IL13RA1  | 1  | 1  | 0  | 16          | 1  | 0          |
| IL15     | 1  | 1  | 0  | 4           | 1  | 0          |
| IL18     | 4  | 4  | 1  | 11.75       | 4  | 0.359375   |

|          |   |   |   |             |   |            |
|----------|---|---|---|-------------|---|------------|
| IL18R1   | 2 | 2 | 1 | 15          | 2 | 0.55555556 |
| IL1RAP   | 3 | 3 | 0 | 30.66666667 | 3 | 0.55757576 |
| IL21R    | 1 | 1 | 0 | 16          | 1 | 0          |
| IL6R     | 2 | 2 | 0 | 13          | 2 | 0.52173913 |
| TGFBR1   | 4 | 4 | 3 | 8.5         | 4 | 0.34782609 |
| LIMS1    | 2 | 2 | 0 | 5.5         | 2 | 0.5        |
| NLK      | 1 | 1 | 0 | 4           | 1 | 0          |
| NR2C2    | 1 | 1 | 0 | 4           | 1 | 0          |
| PPP3CA   | 1 | 1 | 0 | 1           | 1 | 0          |
| PPP3CB   | 1 | 1 | 1 | 1           | 1 | 0          |
| PTGS2    | 1 | 1 | 0 | 18          | 1 | 0          |
| RFX5     | 1 | 1 | 0 | 1           | 1 | 0          |
| RFXAP    | 1 | 1 | 1 | 1           | 1 | 0          |
| TNFRSF10 | 1 | 1 | 1 | 5           | 1 | 0          |
| TXK      | 1 | 1 | 0 | 11          | 1 | 0          |

Transcription factor

| TF ID  | Count | P. Value | Benjamini | FDR      | Genes                                                                                                                                                                                                                                                                                                                                                                                                                                                                                                                                                                                                   |
|--------|-------|----------|-----------|----------|---------------------------------------------------------------------------------------------------------------------------------------------------------------------------------------------------------------------------------------------------------------------------------------------------------------------------------------------------------------------------------------------------------------------------------------------------------------------------------------------------------------------------------------------------------------------------------------------------------|
| POU6F1 | 83    | 4.35E-04 | 0.041277  | 0.037055 | SCYL3, ATF2, VIPR1, GMFB, LEAP2, CBLB, HMGB1, IL1RAP, NR3C1, PIK3CG, BACH2, NR3C2, IFIH1, IKBKB, PPP3CA, PPP3CB, SLK, NAMPT, BLNK, NCK2, ITGAV, FAM3C, TRIM22, IL13RA1, VAV3, MAP2K1, MME, CHUK, IL15, SPINK5, FOS, NGF, DCK, TGFBR1, TGFBR3, FGR, PIK3CA, RFX5, PRKCQ, RAF1, TLR4, PSMD11, PSMD14, TXK, IREB2, CXCR4, UBR1, CD1D, PIK3R1, PTGS2, NLK, RLF, TANK, RXRB, NRAS, ACVR1C, PDGFD, S1PR1, FYN, PAK2, TCF7L2, ERAP2, CMTM4, KLRC3, STAT1, IL10RA, ERAP1, CRIM1, SH2D1B, BRAF, ACVR2A, AIMP1, CYLD, PSMC6, APC, TNFSF4, CD28, ZYX, VIM, CD247, CRLF3, SMAP2, IL18R1                             |
| IRF7   | 87    | 6.07E-04 | 0.041277  | 0.037055 | ATF2, GMFB, HSP90AB1, CD81, CBLB, IL1RAP, NR3C1, PIK3CG, BACH2, CXCL5, NR3C2, IFIH1, PPP3CA, PPP3CB, SLK, NAMPT, NCK2, ITGAV, SCYL2, PF4V1, NCK1, VAV3, MAP2K1, MME, IL15, EED, LANCL1, F2R, SPINK5, IL18, SYTL1, FOS, TMEM173, RHOA, TAPBP, TGFBR3, FGR, PIK3CA, CD8A, IRF1, PSME3, RFX5, PRKCQ, PIGF, PSMD14, PTGER2, TXK, IREB2, CXCR4, CSF2RB, UBR1, NOD2, NR2C2, NLK, TANK, RXRB, PGRMC2, ACVR1C, CD19, PDGFD, CCL4, S1PR1, CSK, FYN, ICOS, IL12RB2, MICB, TCF7L2, HLA-DRB4, EGF, CMTM4, HSPA4, STAT1, IL10RA, ERAP1, CRIM1, ACVR2A, AIMP1, CYLD, APC, CD28, VIM, CD247, SMAP2, LAT, IL18R1, LIMS1 |
| FOXD3  | 69    | 7.04E-04 | 0.041277  | 0.037055 | SCYL3, ATF2, CBLB, HMGB1, IL1RAP, NR3C1, PIK3CG, BACH2, CXCL5, NR3C2, IFIH1, MC4R, PPP3CA, PPP3CB, SLK, GNLY, CASP3, NAMPT, BLNK, TNFRSF8, FAM3C, IL6R, IL13RA1, VAV3, MME, CHUK, IL15, IL18, NGF, TGFBR1, TAPBP, TGFBR3, FGR, CREB1, NOV, LAP3, CX3CR1, PSMD14, PTGER2, IREB2, CXCR4, UBR1, CD1D, ADRB2, PIK3R1, NR2C2, NLK, TANK, MALT1, ACVR1C, S1PR1, FYN, IL12RB2, TCF7L2, ERAP2, EGF, STAT1, ERAP1, CRIM1, BRAF, ACVR2A, AIMP1, CYLD, PSMC6, APC, CDK4, CD28, CD247, SMAP2                                                                                                                        |



|      |    |          |        |          |                                                                                                                                                                                                                                                                                                                                                                                                                                                                                                                                                                                                  |
|------|----|----------|--------|----------|--------------------------------------------------------------------------------------------------------------------------------------------------------------------------------------------------------------------------------------------------------------------------------------------------------------------------------------------------------------------------------------------------------------------------------------------------------------------------------------------------------------------------------------------------------------------------------------------------|
| ISRE | 84 | 9.50E-04 | 0.0418 | 0.037525 | CSF3R, GMFB, HSP90AB1, LEAP2, SECTM1, CBLB, HMGB1, IL1RAP, NR3C1, PIK3CG, BACH2, CXCL5, NR3C2, PPP3CA, PPP3CB, PSMD7, FCGRT, CASP3, NAMPT, BLNK, NCK2, CCR7, ITGAV, FAM3C, CCR6, TRIM27, IL6R, PF4V1, IL13RA1, NCK1, VAV3, MAP2K1, MME, IL15, EED, LANCL1, SPINK5, RHOA, TAPBP, TGFBR3, FGR, CREB1, CD8B, PIK3CA, NOV, CD8A, IRF1, PSME3, RFX5, PRKCQ, PIGF, TLR4, PSMD11, PSMD14, TXK, CXCR4, CSF2RB, ADRB2, NOD2, TANK, MALT1, RXRB, NRAS, ACVR1C, PDGFD, SH3BP2, S1PR1, FYN, IL12RB2, TCF7L2, EGF, CMTM4, HSPA4, IL10RA, ERAP1, CRIM1, SH2D1B, ACVR2A, CYLD, PSMC6, APC, RFXAP, SMAP2, IL18R1 |
|------|----|----------|--------|----------|--------------------------------------------------------------------------------------------------------------------------------------------------------------------------------------------------------------------------------------------------------------------------------------------------------------------------------------------------------------------------------------------------------------------------------------------------------------------------------------------------------------------------------------------------------------------------------------------------|
